# Supplementary material for: Dopamine neuron dependent behaviors mediated by glutamate cotransmission
Source: eLife. 2017 Jul 13;6:e27566. doi: 10.7554/eLife.27566 (PMC5599237; doi:10.7554/eLife.27566)
Supplement: Figure 1—source data 1. — DOI: http://dx.doi.org/10.7554/eLife.27566.004 [file elife-27566-fig1-data1.xlsx]

## Sheet: Figure 1C & D
Stereology of TH and PAG positive cells in the VTA and SNc in Juvenile and Adult
JUVENILE
SN					VTA
	Mouse 1513	SN % total	SN % TH			Mouse 1513	VTA % total	VTA % TH
TH	2871.31	36.5269	51.046		TH	4758.03	47.4299	62.4616
TH/PAG	2753.64	35.03	48.954		TH/PAG	2859.5	28.5046	37.5384
PAG	2235.86	28.4431			PAG	2414.17	24.0654
Total cells	7860.81				Total cells	10031.7
total TH cells	5624.95				total TH cells	7617.53
	Mouse 1514	% total	% TH			Mouse 1514	% total	% TH
TH	1957.18	27.2402	43.9307		TH	3885.97	41.0526	56.7273
TH/PAG	2497.97	34.767	56.0693		TH/PAG	2964.3	31.3158	43.2727
PAG	2729.74	37.9928			PAG	2615.56	27.6316
Total cells	7184.89				Total cells	9465.83
total TH cells	4455.15				total TH cells	6850.27
	Mouse 1597	% total	% TH			Mouse 1597	% total	% TH
TH	2953.78	30.914	51.5695		TH	5067.47	37.7143	52.9412
TH/PAG	2773.98	29.0322	48.4305		TH/PAG	4504.42	33.5238	47.0588
PAG	3827.07	40.0538			PAG	3864.58	28.7619
Total cells	9554.83				Total cells	13436.5
total TH cells	5727.76				total TH cells	9571.89
	Mouse 1588	% total	% TH			Mouse 1588	% total	% TH
TH	2475.64	32.2684	51.2691		TH	5012.85	35.4949	53.4705
TH/PAG	2353.08	30.6709	48.7309		TH/PAG	4362.14	30.8874	46.5295
PAG	2843.31	37.0607			PAG	4747.75	33.6178
Total cells	7672.03				Total cells	14122.7
total TH cells	4828.72				total TH cells	9374.99
	AVER.SN	SEM	SN AVG % total	SEM	SN % TH	SEM	AVER.VTA	SEM	VTA % total	SEM	VTA % TH	SEM
TH	2564.48	262.975	31.7374	2.21419	49.4538	2.12945	4681.08	315.786	40.4229	3.00216	56.4001	2.52533
TH / PAG	2594.67	117.917	32.375	1.72719	50.5462	2.12945	3672.59	508.834	31.0579	1.18769	43.5999	2.52533
PAG	2908.99	384.768	35.8876	2.95494			3410.51	634.125	28.5192	2.27739
Total cells	8068.14	595.377					11764.2	1359.87
total TH cells	5159.14	356.696					8353.67	769.507
ADULT
SN					VTA
	Mouse 1540	SN % total	SN % TH			Mouse 1540	VTA % total	VTA % TH
TH	2721.94	27.1954	39.834		TH	3513.53	26.1604	36.9048
TH/PAG	4111.27	41.0765	60.166		TH/PAG	6007	44.7258	63.0952
PAG	3175.6	31.728			PAG	3910.21	29.1139
Total cells	10008.8				Total cells	13430.7
total TH cells	6833.21				total TH cells	9520.53
	Mouse 1547	% total	% TH			Mouse 1547	% total	% TH
TH	2895	34.2205	50.2794		TH	3679.33	31.1798	46.4435
TH/PAG	2862.83	33.8403	49.7206		TH/PAG	4242.83	35.9551	53.5565
PAG	2702	31.9392			PAG	3878.21	32.8652
Total cells	8459.83				Total cells	11800.4
total TH cells	5757.83				total TH cells	7922.16
	Mouse 3530	% total	% TH			Mouse 3530	% total	% TH
TH	2625.17	27.0271	41.1985		TH	4541.75	37.1373	52.7473
TH/PAG	3746.83	38.5749	58.8015		TH/PAG	4068.65	33.2688	47.2527
PAG	3341.12	34.398			PAG	3619.21	29.5938
Total cells	9713.12				Total cells	12229.6
total TH cells	6372				total TH cells	8610.4
	AVER.SN	SEM	SN % total	SEM	SN % TH	SEM	AVER.VTA	SEM	VTA % total	SEM	VTA % TH	SEM
TH	2747.37	96.662	29.481	2.90297	43.7706	4.01486	3911.54	390.352	31.4925	3.88566	45.3652	5.63996
TH/PAG	3573.64	453.953	37.8306	2.59868	56.2294	4.01486	4772.83	758.278	37.9832	4.23676	54.6348	5.63996
PAG	3072.91	234.551	32.6884	1.04957			3802.54	112.837	30.5243	1.4435
Total cells	9393.92	581.486					12486.9	597.572
total TH cells	6321.01	381.484					8684.36	566.921
STATISTICS
Figure 1C (stereology cell type effect) - ANOVA 2 (region) x 3 (cell type)
Tests of Between-Subjects Effects
Dependent Variable:	estnumber
Source	Type III Sum of Squares	df	Mean Square	F	Sig.	Partial Eta Squared	Noncent. Parameter	Observed Powerb
Corrected Model	12998467.530a	5	2.59969e+06	5.24208	0.00382906	0.592856	26.2104	0.944858
Intercept	2.62214e+08	1	2.62214e+08	528.735	8.55599e-15	0.967077	528.735	1
celltype	1.21158e+06	2	605788	1.22153	0.318083	0.119505	2.44305	0.232335
region	9.10717e+06	1	9.10717e+06	18.3639	0.000445368	0.505004	18.3639	0.981565
celltype * region	2.67972e+06	2	1.33986e+06	2.70173	0.0941741	0.230883	5.40346	0.466514
Error	8.92669e+06	18	495927
Total	2.84139e+08	24
Corrected Total	2.19252e+07	23
Figure 1E (stereology age effect) - ANOVA 2 (age) x 2 (region)
	Tests of Between-Subjects Effects
	Dependent Variable:	percentage
	Source	Type III Sum of Squares	df	Mean Square	F	Sig.	Partial Eta Squared	Noncent. Parameter	Observed Powerb
	Corrected Model	339.943a	3	113.314	3.90625	0.0439183	0.539569	11.7188	0.650313
	Intercept	36025.5	1	36025.5	1241.9	8.02987e-12	0.992012	1241.9	1
	age	239.669	1	239.669	8.26204	0.0165442	0.452416	8.26204	0.736067
	region	62.4884	1	62.4884	2.15414	0.172921	0.177235	2.15414	0.264479
	age * region	24.5489	1	24.5489	0.846265	0.379267	0.0780236	0.846265	0.132726
	Error	290.085	10	29.0085
	Total	36554	14
	Corrected Total	630.028	13
