# Supplementary material for: Dopamine neuron dependent behaviors mediated by glutamate cotransmission
Source: eLife. 2017 Jul 13;6:e27566. doi: 10.7554/eLife.27566 (PMC5599237; doi:10.7554/eLife.27566)
Supplement: Figure 2—figure supplement 1—sourcedata 1. — DOI: http://dx.doi.org/10.7554/eLife.27566.008 [file elife-27566-fig1.xlsx]

## Sheet: Figure 2 - Suppl 1A
mRNA expression
Ventral Midbrain									Dorsal Striatum
Gene	ID	Genotype	C(t)	C(t) GAPDH	dCT (C(t)marker-C(t)GAPDH)	COPY NUMBER (1000*2^-dCT)			Gene	ID	Genotype	C(t)	C(t) GAPDH	dCT (C(t)marker-C(t)GAPDH)	COPY NUMBER (1000*2^-dCT)
D2	3020	ctrl	25.56	18.24	7.32	6.25836			D1	3020	ctrl	22.81	19.14	3.67	78.5633
D2	3022	ctrl	25.64	18.43	7.21	6.7542			D1	3022	ctrl	22.74	18.97	3.77	73.3022
D2	3023	ctrl	25.23	18.44	6.79	9.03663			D1	3023	ctrl	23.16	19.4	3.76	73.812
D2	3026	ctrl	25.86	18.16	7.7	4.80916			D1	3026	ctrl	23.77	19.92	3.85	69.3481
D2	3027	ctrl	25.18	18.35	6.83	8.78952			D1	3027	ctrl	22.3	19.12	3.18	110.338
D2	3018	het	25.39	18.96	6.43	11.5978			D1	3028	ctrl	22.37	18.84	3.53	86.5693
D2	3021	het	29.87	23.09	6.78	9.09948			D1	3018	het	23.01	19.21	3.8	71.7936
D2	3024	het	24.8	18.79	6.01	15.5171			D1	3021	het	22.59	19.05	3.54	85.9714
D2	3025	het	25.7	18.85	6.85	8.66851			D1	3024	het	21.99	19.11	2.88	135.842
D2	3029	het	25.63	18.51	7.12	7.18897			D1	3025	het	22.7	18.59	4.11	57.9118
									D1	3029	het	22.69	18.9	3.79	72.293
DAT	3020	ctrl	21.85	18.24	3.61	81.8996			D1	3030	het	21.79	18.73	3.06	119.908
DAT	3022	ctrl	22.52	18.43	4.09	58.7202
DAT	3023	ctrl	21.76	18.44	3.32	100.134			D2	3020	ctrl	22.92	19.14	3.78	72.7958
DAT	3026	ctrl	22.93	18.16	4.77	36.6511			D2	3022	ctrl	22.75	18.97	3.78	72.7958
DAT	3027	ctrl	22.52	18.35	4.17	55.5527			D2	3023	ctrl	23.19	19.4	3.79	72.293
DAT	3018	het	22.43	18.96	3.47	90.2456			D2	3026	ctrl	23.73	19.92	3.81	71.2977
DAT	3021	het	27.03	23.09	3.94	65.1541			D2	3027	ctrl	22.26	19.12	3.14	113.44
DAT	3024	het	22.54	18.79	3.75	74.3254			D2	3028	ctrl	22.35	18.84	3.51	87.7778
DAT	3025	het	23.29	18.85	4.44	46.0709			D2	3018	het	23.39	19.21	4.18	55.1689
DAT	3029	het	23.18	18.51	4.67	39.2817			D2	3021	het	22.88	19.05	3.83	70.3162
									D2	3024	het	22.52	19.11	3.41	94.0779
TH	3020	ctrl	25.51	18.24	7.27	6.47906			D2	3025	het	22.96	18.59	4.37	48.3614
TH	3022	ctrl	26.1	18.43	7.67	4.91021			D2	3029	het	22.58	18.9	3.68	78.0207
TH	3023	ctrl	25.06	18.44	6.62	10.1667			D2	3030	het	21.69	18.73	2.96	128.514
TH	3026	ctrl	26.4	18.16	8.24	3.3076
TH	3027	ctrl	25.77	18.35	7.42	5.83925
TH	3018	het	26.31	18.96	7.35	6.12956
TH	3021	het	29.92	23.09	6.83	8.78952
TH	3024	het	25.54	18.79	6.75	9.29068
TH	3025	het	26.9	18.85	8.05	3.77319
TH	3029	het	25.67	18.51	7.16	6.99238
VMAT	3020	ctrl	22.87	18.24	4.63	40.386
VMAT	3022	ctrl	22.61	18.43	4.18	55.1689
VMAT	3023	ctrl	22.73	18.44	4.29	51.1189
VMAT	3026	ctrl	23.05	18.16	4.89	33.7259
VMAT	3027	ctrl	22.55	18.35	4.2	54.4094
VMAT	3018	het	22.48	18.96	3.52	87.1715
VMAT	3021	het	26.86	23.09	3.77	73.3022
VMAT	3024	het	22.67	18.79	3.88	67.9209
VMAT	3025	het	23.49	18.85	4.64	40.1071
VMAT	3029	het	23.28	18.51	4.77	36.6511
STATISTICS
Figure 2—figure supplement 1A (mRNA Dopamine markers DAT-Ires-cre mice) - multivariate ANOVA genotype effect
Ventral Midbrain											Dorsal Striatum
Tests of Between-Subjects Effects											Tests of Between-Subjects Effects
Source		Type III Sum of Squares	df	Mean Square	F	Sig.	Partial Eta Squared	Noncent. Parameter	Observed Powere		Source		Type III Sum of Squares	df	Mean Square	F	Sig.	Partial Eta Squared	Noncent. Parameter	Observed Powerc
Corrected Model	DATvm	31.968a	1	31.9678	0.0614169	0.810513	0.00761862	0.0614169	0.0555436		Corrected Model	D1str	223.489a	1	223.489	0.383801	0.54943	0.0369616	0.383801	0.0869161
	THvm	1.825b	1	1.82541	0.320427	0.586874	0.0385109	0.320427	0.0792523			D2str	21.176b	1	21.1758	0.0374026	0.850519	0.00372632	0.0374026	0.0535394
	VMATvm	494.822c	1	494.822	1.74225	0.22337	0.178835	1.74225	0.214372		Intercept	D1str	89381.3	1	89381.3	153.496	2.16241e-07	0.938836	153.496	1
	D2vm	26.975d	1	26.9748	3.90269	0.0836262	0.327883	3.90269	0.412732			D2str	77579.5	1	77579.5	137.028	3.68803e-07	0.931986	137.028	1
Intercept	DATvm	41994.9	1	41994.9	80.6811	1.88018e-05	0.909789	80.6811	1		genotype	D1str	223.489	1	223.489	0.383801	0.54943	0.0369616	0.383801	0.0869161
	THvm	431.362	1	431.362	75.7202	2.37253e-05	0.904444	75.7202	1			D2str	21.1758	1	21.1758	0.0374026	0.850519	0.00372632	0.0374026	0.0535394
	VMATvm	29155.9	1	29155.9	102.657	7.69604e-06	0.927704	102.657	1		Error	D1str	5823.04	10	582.304
	D2vm	769.475	1	769.475	111.327	5.67882e-06	0.932957	111.327	1			D2str	5661.6	10	566.16
genotype	DATvm	31.9678	1	31.9678	0.0614169	0.810513	0.00761862	0.0614169	0.0555436		Total	D1str	95427.9	12
	THvm	1.82541	1	1.82541	0.320427	0.586874	0.0385109	0.320427	0.0792523			D2str	83262.3	12
	VMATvm	494.822	1	494.822	1.74225	0.22337	0.178835	1.74225	0.214372		Corrected Total	D1str	6046.53	11
	D2vm	26.9748	1	26.9748	3.90269	0.0836262	0.327883	3.90269	0.412732			D2str	5682.77	11
Error	DATvm	4164.04	8	520.505
	THvm	45.5744	8	5.6968
	VMATvm	2272.1	8	284.013
	D2vm	55.2949	8	6.91186
Total	DATvm	46190.9	10
	THvm	478.762	10
	VMATvm	31922.8	10
	D2vm	851.745	10
Corrected Total	DATvm	4196.01	9
	THvm	47.3998	9
	VMATvm	2766.93	9
	D2vm	82.2697	9

## Sheet: Figure 2 - Suppl 1B & 1C
DAT-IREScre HETs - ACUTE AMPHETAMINE STUDY - males
TOTAL AMBULATORY DISTANCE
WT								Bins of 10 min
mouse ID	Group	Chamber	GENOTYPE	DRUG	SUM baseline	SUM post-inj		1	2	3	4	5	6	7	8	9	10	11	12	13	14	15	16	17	18
1103	m1 group1	2	WT	veh	3896.53	1466.81		1912.17	1091.43	892.933	870.198	175.082	0	0	112.272	177.425	0	0	0	0	0	0	131.835	0	0
1114	m2 group1	2	WT	veh	7217.83	2443.55		2781.03	2267.09	2169.71	1267.79	628.88	198.807	103.069	0	0	0	0	0	0	22.7356	222.262	0	0	0
1115	m2 group2	2	WT	veh	4090.52	1158.44		2054.12	1255.88	780.526	674.339	141.988	188.958	0	0	89.1515	64.003	0	0	0	0	0	0	0	0
1225	m8 group2	5	WT	veh	3536.59	1676.75		1999.54	1108.18	428.868	875.729	41.077	152.073	28.286	0	0	301.032	61.8613	0	0	216.69	0	0	0	0
1289	m11 group1	1	WT	veh	6026.79	2414.47		2762.69	1665.11	1599	792.448	288.101	238.855	70.7446	227.94	244.048	142.514	67.0953	0	0	0	0	141.267	201.462	0
1297	m13 group1	7	WT	veh	4299	855.83		2124.71	1216.11	958.178	375.724	0	207.76	136.073	0	0	0	0	0	0	0	0	0	136.273	0
				AVG	4844.54	1669.31		2272.38	1433.96	1138.2	809.372	212.521	164.409	56.362	56.7019	85.1041	84.5915	21.4928	0	0	39.9043	37.0437	45.5171	56.2891	0
		n=	6	SE	547.875	246.026		148.59	173.219	239.045	110.172	86.1895	32.2445	21.3031	35.9646	39.8321	45.3849	12.6004	0	0	32.9144	34.2958	26.6759	33.8679	0
1176	m5 group2	3	WT	3mg/kg	4560.41	20752.1		1982.73	1370.26	1207.42	1151.05	829.759	638.245	297.749	503.052	1486.66	2215.71	1925.97	2530.59	2650.49	870.757	2132.22	1410.88	1536.9	572.1
1129	m3 group2	1	WT	3mg/kg	4824.16	65709.4		2129.56	1173.3	1521.3	2962.89	5171.79	8394.15	10104.4	9146.03	7735.14	4849.98	3542.15	2807.59	2947.38	2355.99	1583.76	1222.62	688.811	2196.74
1218	m7 group 2	3	WT	3mg/kg	5144.22	77747.7		2144.14	1506.09	1493.98	2282.36	4267.77	7046.28	9580.84	9126.87	8729.19	6637.2	6732.04	6693.67	4971.4	5360.22	4163.02	1929.59	227.21	0
1254	m9 group1	3	WT	3mg/kg	3816.08	29530.6		1945.4	1220.13	650.559	832.774	1495.24	2233.36	2870.63	3295.81	4124.64	3095	3037.23	3470.69	1907.61	879.449	847.501	345.814	0	1094.9
1291	m11 group1	4	WT	3mg/kg	2272.51	36729.8		1209.5	755.218	307.794	974.096	3878.91	6607.99	7145.28	7484.71	3279.29	851.835	700.622	641.491	1581.24	1032.26	1037.04	1189.54	325.506	0
1293	m13 group1	4	WT	3mg/kg	3917.61	23744.3		1646.56	1020.28	1250.77	1191.69	2996.82	4579.69	4510.11	3236.49	2363.55	2123.31	1674.96	291.932	637.891	0	0	0	0	137.835
				AVG	4089.17	42369		1842.98	1174.21	1071.97	1565.81	3106.72	4916.62	5751.5	5465.49	4619.74	3295.51	2935.5	2739.33	2449.34	1749.78	1627.26	1016.41	463.072	666.928
		n=	6	SE	388.391	8955.79		135.513	99.9916	184.535	323.584	632.509	1135.24	1465.19	1366.24	1115.37	795.255	799.908	871.953	560.044	727.215	542.252	269.645	220.875	325.225
1171	m4m5 group1	2	WT	5mg/kg	5864.06	108258		2152.38	1430.85	2280.84	8269.41	11894.7	9491.21	8902.35	8792.43	9667.48	8405.16	8223.37	6603.52	5019.68	4416.2	4838.52	4777.82	5055.95	3900.49
1211	m7 group1	4	WT	5mg/kg	7242.45	155231		2930.93	2688.36	1623.16	12611	12472.5	12530.7	13838.4	13866.6	14544.7	13236.6	13579.8	13921.8	8817.31	5665.2	5844.11	5483.57	5952.17	2866.58
1230	m6 group2	7	WT	5mg/kg	5219.97	93194.7		2510.27	1500.17	1209.53	7943.23	7846.91	7029.93	7423.72	7675.71	8876.46	6998.66	6225.18	5309.23	5077.81	4998.73	5313.77	4229.21	4009.6	4236.53
1261	m10 group1	5	WT	5mg/kg	9222.91	71725.1		4107.95	2470.17	2644.79	8233.85	11877.5	5507.81	2500.9	2432.31	3857.13	4465.75	6409.92	5964.22	5919.12	5388.74	3036.91	2445.43	1721.92	1963.59
1292	m11 group1	5	WT	5mg/kg	4820.26	111762		2277.54	1054	1488.72	7108.13	8992.07	10041.8	10477.2	10012.1	8750.23	8446.78	9001.38	9609.12	8416.46	6658.46	4350.04	4821.7	2835.47	2241.32
1300	m12 group1	1	WT	5mg/kg	3752.12	136254		2084.3	1040.09	627.73	4812.81	11972.5	14564.1	15090.2	16051.9	15354.7	15527.8	14787.1	11666.7	10796.6	4523.97	510.037	187.53	407.992	0
				AVG	6020.3	112738		2677.23	1697.27	1645.8	8163.07	10842.7	9860.91	9705.47	9805.19	10175.1	9513.45	9704.46	8845.76	7341.16	5275.22	3982.23	3657.55	3330.52	2534.75
		n=	6	SE	736.79	11267.8		289.136	269.134	275.33	958.958	727.224	1269.21	1727.34	1816.43	1601.9	1551.07	1378.4	1310.88	891.38	314.282	737.91	751.792	787.132	578.389
HET								Bins of 10 min
mouse ID	Group	Chamber	GENOTYPE	DRUG	SUM baseline	SUM post-inj		1	2	3	4	5	6	7	8	9	10	11	12	13	14	15	16	17	18
1107	m1 group2	2	HET	veh	4201.22	3310.23		2272.32	1042.8	886.106	884.104	538.372	651.337	358.084	0	0	0	381.548	0	0	0	0	154.923	273.648	68.2113
1127	m3 group2	1	HET	veh	3721.23	1490.89		1494.96	1040.98	1185.29	423.464	445.689	173.727	31.75	136.343	0	0	0	279.92	0	0	0	0	0	0
1205	m6 group1	1	HET	veh	9247.65	6671.95		4113.63	3055.96	2078.06	2544.09	1461.73	381.544	465.459	0	311.608	236.136	0	63.1313	0	0	269.307	0	0	938.941
1227	m6 group2	6	HET	veh	3004.88	2922.18		1741.86	1166.99	96.0342	1163.1	116.585	0	746.678	46.7471	0	590.919	116.21	0	0	141.942	0	0	0	0
1252	m9 group1	1	HET	veh	6309.84	1184.64		3513.46	1811.38	984.991	906.145	0	134.219	0	0	0	0	0	0	144.273	0	0	0	0	0
				AVG	5296.97	3115.98		2627.25	1623.62	1046.1	1184.18	512.476	268.165	320.394	36.618	62.3216	165.411	99.5516	68.6102	28.8547	28.3885	53.8614	30.9845	54.7295	201.43
		n=	5	SE	1264.2	1092.34		569.356	431.002	354.99	402.79	287.835	127.095	156.155	29.6545	69.6777	129.456	82.7386	60.6237	32.2605	31.7393	60.2189	34.6418	61.1895	206.669
1102	m1 group1	1	HET	3mg/kg	7248.31	43585.4		3401.1	1777.06	2070.15	1977.82	6121.26	6181.39	6164.09	5194.24	3375.43	3144.69	2561.88	1999.92	1883.83	1575.3	1542.29	33.9213	480.58	1348.73
1113	m2 group2	1	HET	3mg/kg	8008.23	37404.8		3222.96	2516.55	2268.72	2089.38	6980.15	7060.05	6034	6648.64	2915.07	1175.25	1453.26	441.249	1693.99	609.108	0	251.338	53.34	0
1209	m6 group2	1	HET	3mg/kg	5323.72	28239.3		2438.63	1640.93	1244.16	1924.12	2947.61	2702.99	2292.01	2395.87	2234.31	2679.4	2109.08	2112.8	1765.22	1622	1268.78	683.021	937.491	564.615
1288	m11 group1	1	HET	3mg/kg	4582.45	40937.4		2309.42	1454.39	818.644	2256.68	4524.79	5610.79	5148.68	4632.48	3500.37	3816.35	3419.57	1605.1	1242.89	1581.56	1218.95	1247.97	1061.39	69.85
1530	last group	1	HET	3mg/kg	6574.93	46188.6		2790.24	1640.88	2143.81	1575.98	4996.28	5812.37	6627.78	6495.15	6477.81	6224.68	3778.22	1548.19	218.976	601.064	0	0	587.723	1244.38
1551	last group	7	HET	3mg/kg	7965.23	54691		3028.66	2702.06	2234.51	2576.04	4348.82	5969.02	6732.31	6890.29	6254.25	5075.53	5021.62	3406.05	3469.37	3225.89	1690.96	30.8922	0	0
				AVG	6617.15	41841.1		2865.17	1955.31	1796.67	2066.67	4986.49	5556.1	5499.81	5376.11	4126.21	3685.98	3057.27	1852.22	1712.38	1535.82	953.497	374.523	520.087	537.93
		n=	6	SE	631.365	3962.68		193.738	232.64	273.616	150.342	633.697	664.296	746.493	765.042	801.5	800.069	573.655	431.205	472.027	428.952	339.336	223.393	196.134	279.644
1105	m1 group2	1	HET	5mg/kg	6990.67	70340.8		3334.26	2058.86	1597.55	5970.75	14209.5	12122.4	10535.8	8813.68	6476.99	4720.57	1410.64	1526.7	1618.08	902.514	376.298	813.484	152.56	690.85
1112	m2 group1	1	HET	5mg/kg	2766.66	119730		1587.4	1179.26	0	5570.87	12541.4	11500.4	12288.7	13390.6	12219.3	11180.5	7742.73	7737.79	9357.17	5572.28	4893.27	2571.51	1883.14	1280.57
1126	m3 group1	3	HET	5mg/kg	5983.79	110129		2454.65	1805.9	1723.24	5830.75	11862.4	11990.6	10648.4	9886.68	9443.78	8236.19	7341.79	6947.78	6494.56	5726.76	4537.98	3898.37	3746.38	3536.45
1268	m10 group1	7	HET	5mg/kg	6596.94	76991.3		3868.84	1837.99	890.111	867.11	2831.57	8737.23	9127.77	8445.51	8192.69	6602.83	3951.27	3827.65	5369.42	5127.72	4239.7	4038.67	2816.11	2816.11
1548	last group	8	HET	5mg/kg	5345.48	97016.1		2819.59	1190.43	1335.46	5683.7	11727	11701.5	12664.8	11285.4	7803.48	5288.14	5130.58	5606.39	5937.1	4489.84	4776.7	2230.52	1709.73	981.33
				AVG	5536.71	94841.5		2812.95	1614.49	1109.27	4784.64	10634.4	11210.4	11053.1	10364.4	8827.25	7205.65	5115.4	5129.26	5755.26	4363.82	3764.79	2710.51	2061.58	1861.06
		n=	5	SE	630.977	7965.97		434.241	202.069	348.662	1097.57	2236.12	701.882	718.613	1009.98	1085.72	1300.9	1297.6	1250.29	1387.86	996.808	955.337	662.544	671.187	622.462
STATISTICS
Figure 2—figure supplement 1B (acute amphetamine DAT-Ires-cre mice) - ANOVA 2 (genotype) x 3(amph dose)
Tests of Between-Subjects Effects
Dependent Variable:	postinjection
Source	Type III Sum of Squares	df	Mean Square	F	Sig.	Partial Eta Squared	Noncent. Parameter	Observed Powerb
Corrected Model	59159855459.425a	5	1.1832e+10	34.6966	3.64349e-11	0.86103	173.483	1
Intercept	8.21461e+10	1	8.21461e+10	240.889	2.77262e-15	0.895868	240.889	1
genotype	2.88444e+08	1	2.88444e+08	0.845846	0.365586	0.029323	0.845846	0.144164
drug	5.66794e+10	2	2.83397e+10	83.1045	1.67664e-12	0.855825	166.209	1
genotype * drug	6.63538e+08	2	3.31769e+08	0.972893	0.390402	0.064977	1.94579	0.201757
Error	9.54836e+09	28	3.41013e+08
Total	151588789790	34
Corrected Total	6.87082e+10	33
Figure 2—figure supplement 1B (acute amphetamine DAT-Ires-cre mice) - ANOVA genotpe effect for 3 mg/kg and 5 mg/kg
3 mg/kg												5 mg/kg
Tests of Within-Subjects Effectsa												Tests of Within-Subjects Effectsa
Measure:	MEASURE_1											Measure:	MEASURE_1
Source		Type III Sum of Squares	df	Mean Square	F	Sig.	Partial Eta Squared	Noncent. Parameter	Observed Powerb			Source		Type III Sum of Squares	df	Mean Square	F	Sig.	Partial Eta Squared	Noncent. Parameter	Observed Powerb
bins	Sphericity Assumed	5.433e+08	14	3.88071e+07	20.5258	2.49415e-27	0.672408	287.361	1			bins	Sphericity Assumed	1.41248e+09	14	1.00891e+08	20.4482	5.16445e-26	0.694379	286.275	1
	Greenhouse-Geisser	5.433e+08	2.3668	2.2955e+08	20.5258	2.96079e-06	0.672408	48.5804	0.999973				Greenhouse-Geisser	1.41248e+09	2.50709	5.63392e+08	20.4482	2.96068e-06	0.694379	51.2656	0.999982
	Huynh-Feldt	5.433e+08	3.45879	1.57078e+08	20.5258	2.87055e-08	0.672408	70.9943	1				Huynh-Feldt	1.41248e+09	3.93938	3.58553e+08	20.4482	9.30929e-09	0.694379	80.5533	1
	Lower-bound	5.433e+08	1	5.433e+08	20.5258	0.00109048	0.672408	20.5258	0.982304				Lower-bound	1.41248e+09	1	1.41248e+09	20.4482	0.00144271	0.694379	20.4482	0.979422
bins * genotype	Sphericity Assumed	2.07575e+07	14	1.48268e+06	0.784215	0.684796	0.0727188	10.979	0.47902			bins * genotype	Sphericity Assumed	1.14905e+08	14	8.20752e+06	1.66347	0.0714678	0.155997	23.2886	0.868837
	Greenhouse-Geisser	2.07575e+07	2.3668	8.77027e+06	0.784215	0.487532	0.0727188	1.85608	0.177256				Greenhouse-Geisser	1.14905e+08	2.50709	4.58321e+07	1.66347	0.207803	0.155997	4.17047	0.346559
	Huynh-Feldt	2.07575e+07	3.45879	6.00137e+06	0.784215	0.526972	0.0727188	2.71243	0.212375				Huynh-Feldt	1.14905e+08	3.93938	2.91684e+07	1.66347	0.180916	0.155997	6.55303	0.454812
	Lower-bound	2.07575e+07	1	2.07575e+07	0.784215	0.39665	0.0727188	0.784215	0.12652				Lower-bound	1.14905e+08	1	1.14905e+08	1.66347	0.22929	0.155997	1.66347	0.211414
Error(bins)	Sphericity Assumed	2.64691e+08	140	1.89065e+06								Error(bins)	Sphericity Assumed	6.21682e+08	126	4.93398e+06
	Greenhouse-Geisser	2.64691e+08	23.668	1.11835e+07									Greenhouse-Geisser	6.21682e+08	22.5638	2.75521e+07
	Huynh-Feldt	2.64691e+08	34.5879	7.65272e+06									Huynh-Feldt	6.21682e+08	35.4544	1.75347e+07
	Lower-bound	2.64691e+08	10	2.64691e+07									Lower-bound	6.21682e+08	9	6.90757e+07
Tests of Between-Subjects Effectsa												Tests of Between-Subjects Effectsa
Measure:	MEASURE_1											Measure:	MEASURE_1
Transformed Variable:	Average											Transformed Variable:	Average
Source	Type III Sum of Squares	df	Mean Square	F	Sig.	Partial Eta Squared	Noncent. Parameter	Observed Powerb				Source	Type III Sum of Squares	df	Mean Square	F	Sig.	Partial Eta Squared	Noncent. Parameter	Observed Powerb
Intercept	1.41827e+09	1	1.41827e+09	66.488	9.9598e-06	0.869261	66.488	1				Intercept	7.79202e+09	1	7.79202e+09	166.25	4.16626e-07	0.948645	166.25	1
genotype	55932.9	1	55932.9	0.00262212	0.960169	0.000262143	0.00262212	0.0502477				genotype	6.19504e+07	1	6.19504e+07	1.32177	0.279908	0.128056	1.32177	0.177664
Error	2.13312e+08	10	2.13312e+07									Error	4.21825e+08	9	4.68694e+07
