# Supplementary material for: Dopamine neuron dependent behaviors mediated by glutamate cotransmission
Source: eLife. 2017 Jul 13;6:e27566. doi: 10.7554/eLife.27566 (PMC5599237; doi:10.7554/eLife.27566)
Supplement: Figure 3—figure supplement 2—source data 1. — DOI: http://dx.doi.org/10.7554/eLife.27566.013 [file elife-27566-fig3-figsupp2-data1.xlsx]

## Sheet: Figure 3 - Suppl 2B-I
Slice Patch Clamp Experiments (supplemental figure)
Current Clamp - Cholinergic Interneurons - Figure 3 Suppl 2B to E
mouse ID	genotype	cell type	Vrest	AP threshold	InputR	IhRatio
1047	ctrl	ChI	-61	-42	174	0.92
1047	ctrl	ChI	-57	-36	203	0.82
2000	ctrl	ChI	-51	-47	164	0.82
1098	ctrl	ChI	-49	-37	379	0.81
1044	ctrl	ChI	-58	-40	323	0.84
1047	ctrl	ChI	-46	-36	297	0.8
2000	ctrl	ChI	-54	-48	405	0.68
2000	ctrl	ChI	-44	-34	431	0.81
1246	ctrl	ChI	-40	-34	195	0.61
1248	ctrl	ChI	-47	-36	218	0.75
1248	ctrl	ChI	-52	-38	289	0.87
1248	ctrl	ChI	-52	-37	407	0.93
1253	ctrl	ChI	-56	-39	314	0.93
1253	ctrl	ChI	-49	-41	231	0.84
1253	ctrl	ChI	-57	-37	403	0.87
1313	ctrl	ChI	-56	-43	342	0.93
1313	ctrl	ChI	-65	-36	360	0.89
1323	ctrl	ChI	-43	-35	184	0.88
1323	ctrl	ChI	-50	-33	216	0.93
1323	ctrl	ChI	-57	-34	309	0.93
		average	-52.2	-38.15	292.2	0.843
n=	20	SEM	1.45971	0.965542	20.2731	0.019932
mouse ID	genotype	cell type	Vrest	AP threshold	InputR	IhRatio
1357	het	ChI	-39	-32	284	0.74
1052	het	ChI	-55	-36	257	0.84
1040	het	ChI	-41	-36	127	0.44
1029	het	ChI	-48	-37	243	0.79
4076	het	ChI	-60	-46	253	0.9
1089	het	ChI	-63	-43	299	0.95
1091	het	ChI	-57	-46	226	0.92
1001	het	ChI	-53	-39	280	0.89
1001	het	ChI	-42	-33	242	0.89
1001	het	ChI	-54	-45	342	0.85
1029	het	ChI	-41	-36	372	0.84
1029	het	ChI	-53	-40	314	0.87
1045	het	ChI	-44	-38	243	0.82
1045	het	ChI	-53	-40	216	0.73
1053	het	ChI	-48	-40	179	0.63
1999	het	ChI	-43	-37	436	0.85
4071	het	ChI	-56	-46	207	0.79
4071	het	ChI	-47	-42	249	0.75
4077	het	ChI	-42	-30	295	0.9
4077	het	ChI	-52	-30	376	0.91
1308	het	ChI	-65	-44	300	0.8
1308	het	ChI	-52	-30	302	0.92
1308	het	ChI	-46	-28	235	0.84
1305	het	ChI	-42	-31	234	0.78
1322	het	ChI	-59	-34	276	0.83
1322	het	ChI	-49	-37	335	0.86
		average	-50.1538	-37.5385	273.923	0.820385
n=	26	SEM	1.45843	1.10161	13.089	0.0211091
Current Clamp - Spiny Projection Neurons - Figure 3 Suppl 2B to E
mouse ID	genotype	cell type	Vrest	AP threshold	InputR	IhRatio
1248	ctrl	SPN	-73	-31	223	0.92
1250	ctrl	SPN	-79	-31	133	0.88
1253	ctrl	SPN	-82	-32	162	1.02
1267	ctrl	SPN	-76	-34	193	0.88
1313	ctrl	SPN	-93	-40	206	0.87
1313	ctrl	SPN	-91	-34	102	0.88
1323	ctrl	SPN	-66	-38	284	0.92
1344	ctrl	SPN	-66	-39	177	0.93
		average	-78.25	-34.875	185	0.9125
n=	8	SEM	3.85317	1.37674	21.1583	0.0185989
mouse ID	genotype	cell type	Vrest	AP threshold	InputR	IhRatio
1040	het	SPN	-64	-41	322	0.97
1052	het	SPN	-80	-39	220	0.94
1053	het	SPN	-89	-38	178	0.9
1086	het	SPN	-78	-38	320	0.97
1086	het	SPN	-67	-35	300	0.91
1089	het	SPN	-65	-40	245	0.96
4077	het	SPN	-89	-37	118	0.89
4076	het	SPN	-88	-35	163	0.9
1308	het	SPN	-66	-32	162	1
1308	het	SPN	-62	-43	257	0.93
1308	het	SPN	-84	-35	135	0.88
1305	het	SPN	-63	-20	250	0.95
		average	-74.5833	-36.0833	222.5	0.933333
n=	12	SEM	3.34382	1.77893	21.4416	0.0113788
STATISTICS
Figure 3—figure supplement 2B-E (membrane properties measured in CC) - ANOVA 2 (cell type) x 2 (genotype effect)
Vrest - Sup 2B											AP threshold supp2C											Imput R supp2D											Ih ratio supp2E
Tests of Between-Subjects Effects											Tests of Between-Subjects Effects											Tests of Between-Subjects Effects											Tests of Between-Subjects Effects
Dependent Variable:	Vrest										Dependent Variable:	APthreshold										Dependent Variable:	InputR										Dependent Variable:	IhRatio
Source	Type III Sum of Squares	df	Mean Square	F	Sig.	Partial Eta Squared	Noncent. Parameter	Observed Powerb			Source	Type III Sum of Squares	df	Mean Square	F	Sig.	Partial Eta Squared	Noncent. Parameter	Observed Powerb			Source	Type III Sum of Squares	df	Mean Square	F	Sig.	Partial Eta Squared	Noncent. Parameter	Observed Powerb			Source	Type III Sum of Squares	df	Mean Square	F	Sig.	Partial Eta Squared	Noncent. Parameter	Observed Powerb
Corrected Model	8715.413a	3	2905.14	43.9646	2.3577e-15	0.680237	131.894	1			Corrected Model	75.445a	3	25.1482	0.984642	0.405911	0.0454772	2.95392	0.255838			Corrected Model	87390.018a	3	29130	5.42683	0.00222386	0.207976	16.2805	0.922144			Corrected Model	.131a	3	0.043822	5.94651	0.00124518	0.223442	17.8395	0.944627
Intercept	218845	1	218845	3311.87	1.58511e-55	0.981623	3311.87	1			Intercept	72581	1	72581	2841.8	1.66228e-53	0.978649	2841.8	1			Intercept	3.19215e+06	1	3.19215e+06	594.687	1.78177e-33	0.905587	594.687	1			Intercept	41.4657	1	41.4657	5626.78	1.46167e-62	0.989101	5626.78	1
genotype	110.584	1	110.584	1.67351	0.200588	0.0262827	1.67351	0.246868			genotype	1.35591	1	1.35591	0.0530887	0.818532	0.000855537	0.0530887	0.0559164			genotype	1249.01	1	1249.01	0.232687	0.631237	0.00373898	0.232687	0.0762172			genotype	6.97462e-06	1	6.97462e-06	0.000946436	0.975556	1.52649e-05	0.000946436	0.0501051
celtype	8476.43	1	8476.43	128.277	9.76224e-17	0.674159	128.277	1			celtype	71.0777	1	71.0777	2.78294	0.100317	0.0429579	2.78294	0.375558			celtype	84525.2	1	84525.2	15.7468	0.000190612	0.202539	15.7468	0.974177			celtype	0.110766	1	0.110766	15.0306	0.000258127	0.195126	15.0306	0.968291
genotype * celtype	9.13924	1	9.13924	0.138308	0.711237	0.0022258	0.138308	0.0654968			genotype * celtype	12.2515	1	12.2515	0.479689	0.491149	0.00767752	0.479689	0.104739			genotype * celtype	10505.2	1	10505.2	1.95708	0.166809	0.0305999	1.95708	0.280491			genotype * celtype	0.00631183	1	0.00631183	0.856497	0.358309	0.0136262	0.856497	0.149186
Error	4096.9	62	66.0791								Error	1583.51	62	25.5405								Error	332802	62	5367.78								Error	0.4569	62	0.00736936
Total	239222	66									Total	92769.7	66									Total	4.85585e+06	66									Total	49.2645	66
Corrected Total	12812.3	65									Corrected Total	1658.96	65									Corrected Total	420192	65									Corrected Total	0.588366	65
Voltage Clamp - Cholinergic Interneurons - Figure 3 Suppl 2F & G
mouse ID	genotype	cell type	Rise Time	Decay Time
1581	ctrl	ChI	1.9	6.4
1581	ctrl	ChI	2.4	18.2
1581	ctrl	ChI	1.3	4.5
1590	ctrl	ChI	1.8	5.6
rec15a	ctrl	ChI	2.1	5.8
rec15a	ctrl	ChI	3.5	4.6
rec15b	ctrl	ChI	2.3	15.4
rec16a	ctrl	ChI	1.7	8.2
1376	ctrl	ChI	2.4	8.4
1387	ctrl	ChI	1.3	3.6
1383	ctrl	ChI	2.1	4.7
1381	ctrl	ChI	2.3	12.1
		average	2.09167	8.125
n=	12	SEM	0.176962	1.41667
mouse ID	genotype	cell type	Rise Time	Decay Time
1467	het	ChI	1.8	5.6
1484	het	ChI	14.9	61.7
1484	het	ChI	1.5	4.5
1500	het	ChI	2.2	9.2
1595	het	ChI	2.2	17.6
1501	het	ChI	3.7	39.2
rec16b	het	ChI	2.5	10
rec16c	het	ChI	3.1	8.6
1232	het	ChI	1.8	5.9
1367	het	ChI	1.9	7.3
1384	het	ChI	2	6.2
1384	het	ChI	2.4	5
		average	3.33333	15.0667
n=	12	SEM	1.11343	5.29383
Voltage Clamp - Spiny Projection Neurons - Figure 3 Suppl 2F & G
mouse ID	genotype	cell type	Rise Time	Decay Time
rec15a	ctrl	SPN	3.8	22.4
rec15a	ctrl	SPN	3.3	10.2
rec15b	ctrl	SPN	4.8	8.1
rec15b	ctrl	SPN	4	7.9
rec15b	ctrl	SPN	7	6.6
rec16a	ctrl	SPN	6.2	8.6
rec16a	ctrl	SPN	2.6	8.4
1931	ctrl	SPN	3.8	9.6
1931	ctrl	SPN	3.5	7.6
1930	ctrl	SPN	4.5	9.4
1232	ctrl	SPN	2	5.4
1269	ctrl	SPN	3.2	9.3
1269	ctrl	SPN	2.5	8.6
		average	3.93846	9.39231
n=	13	SEM	0.411221	1.18729
mouse ID	genotype	cell type	Rise Time	Decay Time
1749	het	SPN	7.5	13.4
1749	het	SPN	3.4	9.4
rec16b	het	SPN	3.2	6.6
1762	het	SPN	3.8	9.1
1762	het	SPN	2.9	8.3
1766	het	SPN	4.1	11.4
1764	het	SPN	6.6	21.7
1927	het	SPN	3.7	8.5
1933	het	SPN	3	8
1934	het	SPN	4.2	11.6
1233	het	SPN	3.8	11.2
1367	het	SPN	2.2	4.3
1386	het	SPN	2.8	9.2
		average	3.93846	10.2077
n=	13	SEM	0.43358	1.2043
STATISTICS
Figure 3—figure supplement 2F & G (evoked responses porperties measured in VC) - ANOVA 2 (cell type) x 2 (genotype effect)
Rising time - Sup 2F
											Decay time - Sup 2G
Tests of Between-Subjects Effects											Tests of Between-Subjects Effects
Dependent Variable:	risetime										Dependent Variable:	decay
Source	Type III Sum of Squares	df	Mean Square	F	Sig.	Partial Eta Squared	Noncent. Parameter	Observed Powerb			Source	Type III Sum of Squares	df	Mean Square	F	Sig.	Partial Eta Squared	Noncent. Parameter	Observed Powerb
Corrected Model	28.008a	3	9.33588	2.09266	0.114184	0.120088	6.27798	0.500673			Corrected Model	333.690a	3	111.23	1.26471	0.297578	0.0761961	3.79412	0.315644
Intercept	552.056	1	552.056	123.745	1.23492e-14	0.729005	123.745	1			Intercept	5713.12	1	5713.12	64.9592	2.41513e-10	0.585433	64.9592	1
celltype	18.7572	1	18.7572	4.20448	0.0460404	0.0837471	4.20448	0.519026			celltype	40.2482	1	40.2482	0.45763	0.502121	0.00985048	0.45763	0.101593
genotype	4.81022	1	4.81022	1.07822	0.304523	0.0229028	1.07822	0.174254			genotype	187.736	1	187.736	2.1346	0.150806	0.0443464	2.1346	0.298619
celltype * genotype	4.81022	1	4.81022	1.07822	0.304523	0.0229028	1.07822	0.174254			celltype * genotype	117.098	1	117.098	1.33142	0.254512	0.0281298	1.33142	0.204246
Error	205.217	46	4.46125								Error	4045.67	46	87.9493
Total	794.35	50									Total	10063.3	50
Corrected Total	233.225	49									Corrected Total	4379.36	49
Spontaneous EPSCs - Cholinergic Interneurons - Figure 3 Suppl 2H & I
mouse ID	genotype	cell type	Amplitude	Frequency
1482	ChI	CTRL	13.39	4.44
1581	ChI	CTRL	20	1.42
1581	ChI	CTRL	16.69	3.82
1581	ChI	CTRL	14.31	5.49
1586	ChI	CTRL	17.97	5.27
1590	ChI	CTRL	14.4	4.98
rec15a	ChI	CTRL	16.54	14.09
rec15a	ChI	CTRL	13.84	17.79
rec15b	ChI	CTRL	11.87	0.62
rec16a	ChI	CTRL	13.89	0.77
		average	15.29	5.869
n=	10	SEM	0.816575	1.89402
mouse ID	genotype	cell type	Amplitude	Frequency
1467	ChI	cHET	10.08	4.68
1483	ChI	cHET	11.64	4.29
1484	ChI	cHET	9.41	4.93
1484	ChI	cHET	17.13	15.9
1500	ChI	cHET	13.77	5.75
1595	ChI	cHET	14.16	10.44
1501	ChI	cHET	8.22	5.69
rec16b	ChI	cHET	20.47	6.53
rec16c	ChI	cHET	16.63	4.04
1766	ChI	cHET	14.82	28.22
		average	13.633	9.047
n=	10	SEM	1.28328	2.55484
Spontaneous EPSCs - Spiny Projection Neurons - Figure 3 Suppl 2H & I
mouse ID	genotype	cell type	Rise Time	Decay Time
rec15a C	SPN	CTRL	11.19	10.24
rec15a C	SPN	CTRL	13.08	2.74
rec15b C	SPN	CTRL	15.44	4.61
rec15b C	SPN	CTRL	14.41	5.88
rec15b C	SPN	CTRL	12.39	10.95
rec16a C	SPN	CTRL	10.12	6.5
rec16a C	SPN	CTRL	9.12	5.42
1931 Cel	SPN	CTRL	12.95	7.78
1931 Cel	SPN	CTRL	11.46	4.97
1930 Cel	SPN	CTRL	8.6	8.18
		average	11.876	6.727
n=	10	SEM	0.737408	0.855895
mouse ID	genotype	cell type	Amplitude	Frequency
1749 Cel	SPN	cHET	10.48	6.07
1749 Cel	SPN	cHET	11.56	3.3
rec16b C	SPN	cHET	13.91	7.47
1762 Cel	SPN	cHET	15.74	4.44
1762 Cel	SPN	cHET	16.71	7.57
1766 Cel	SPN	cHET	7.95	1.92
1764 Cel	SPN	cHET	14.19	10.98
1927 Cel	SPN	cHET	9.03	5.09
1933 Cel	SPN	cHET	13.93	4.74
1934 Cel	SPN	cHET	12.51	1.93
		average	12.601	5.351
n=	10	SEM	0.947487	0.933397
STATISTICS
Figure 3—figure supplement 2H &I (sEPSCs in ChI and SPN) - ANOVA 2 (cell type) x 2 (genotype effect)
Amplitude											Frequency
Tests of Between-Subjects Effects											Tests of Between-Subjects Effects
Dependent Variable:	amplitude										Dependent Variable:	frequency
Source	Type III Sum of Squares	df	Mean Square	F	Sig.	Partial Eta Squared	Noncent. Parameter	Observed Powerb			Source	Type III Sum of Squares	df	Mean Square	F	Sig.	Partial Eta Squared	Noncent. Parameter	Observed Powerb
Corrected Model	65.774a	3	21.9246	2.59493	0.0674824	0.177797	7.7848	0.588698			Corrected Model	80.101a	3	26.7003	1.01267	0.398399	0.077822	3.03802	0.252093
Intercept	7128.9	1	7128.9	843.758	1.394e-26	0.95908	843.758	1			Intercept	1821.69	1	1821.69	69.0919	6.78062e-10	0.657443	69.0919	1
celltype	49.4173	1	49.4173	5.8489	0.0207713	0.139762	5.8489	0.653069			celltype	20.1356	1	20.1356	0.763691	0.387969	0.020773	0.763691	0.136141
genotype	2.17156	1	2.17156	0.25702	0.615266	0.00708884	0.25702	0.0783443			genotype	8.11801	1	8.11801	0.307895	0.582406	0.0084801	0.307895	0.0840473
celltype * genotype	14.1848	1	14.1848	1.67888	0.20332	0.0445575	1.67888	0.243015			celltype * genotype	51.8473	1	51.8473	1.96643	0.169392	0.0517939	1.96643	0.276376
Error	304.163	36	8.44898								Error	949.183	36	26.3662
Total	7498.84	40									Total	2850.97	40
Corrected Total	369.937	39									Corrected Total	1029.28	39
