# Supplementary material for: Dopamine neuron dependent behaviors mediated by glutamate cotransmission
Source: eLife. 2017 Jul 13;6:e27566. doi: 10.7554/eLife.27566 (PMC5599237; doi:10.7554/eLife.27566)
Supplement: Figure 3—source data 1. — DOI: http://dx.doi.org/10.7554/eLife.27566.010 [file elife-27566-fig3-data1.xlsx]

## Sheet: Figure 3B, 3C, 3D & 3E
Slice Patch Clamp Experiments (main figure)
Voltage Clamp - 0.1 Hz Stimulation - Cholinergic Interneurons - Figure 3B
mouse ID	psnt day		genotype	peak amp (pA)	CNQX
1581	73		ctrl	99.8534
1581	73		ctrl	52.7548
1581	73		ctrl	61.4795
1590	60		ctrl	67.1459
rec15a	61		ctrl	29.3393
rec15a	61		ctrl	21.2758
rec15b	63		ctrl	104.44
rec16a	70		ctrl	47.8577
1376	61		ctrl	38.9962
1387	61		ctrl	54.5075
1383	66		ctrl	40.1565
1381	68		ctrl	33.489
1376	61		ctrl	38.9962	2.15927
1387	61		ctrl	54.5075	3.46475
1383	66		ctrl	40.1565	3.34777
1381	68		ctrl	33.489	3.11504
			average	51.1528
	n=	16	SEM	6.01462
mouse ID	psnt day		genotype	peak amp (pA)	CNQX
1467	67		het	46.4949
1484	64		het	56.6697
1484	64		het	69.96
1500	76		het	97.0382
1595	70		het	57.8256
1501	68		het	136.945
rec16b	70		het	84.3933
rec16c	74		het	94.6729
1232	60		het	47.3774
1367	61		het	46.6865
1384	67		het	67.432
1384	67		het	45.3885
1232	60		het	47.3774	1.06857
1367	61		het	46.6865	2.84899
1384	67		het	67.432	3.68045
1384	67		het	45.3885	1.40618
			average	66.1105
	n=	16	SEM	6.66674
Voltage Clamp - 0.1 Hz Stimulation - Spiny Projections Neurons - Figure 3B
mouse ID	psnt day		genotype	peak amp (pA)	CNQX
rec15a	61		ctrl	8.27094
rec15a	61		ctrl	14.2016
rec15b	63		ctrl	11.3911
rec15b	63		ctrl	25.1106
rec15b	63		ctrl	25.7122
rec16a	70		ctrl	10.3639
rec16a	70		ctrl	13.3515
1931	62		ctrl	18.2694
1931	62		ctrl	31.3158
1930	63		ctrl	14.4715
1232	61		ctrl	30.3278
1269	62		ctrl	33.1492
1269	62		ctrl	22.0882
1232	61		ctrl	30.3278	1.94445
1269	62		ctrl	33.1492	1.22684
1269	62		ctrl	22.0882	2.11384
			average	21.4743
	n=	16	SEM	2.24677
mouse ID	psnt day		genotype	peak amp (pA)	CNQX
1749	60		het	12.8743
1749	60		het	33.4834
rec16b	70		het	20.5404
1762	69		het	28.0812
1762	69		het	18.333
1766	69		het	12.5131
1764	87		het	18.34
1927	66		het	28.9253
1933	63		het	26.45
1934	69		het	7.27714
1233	60		het	9.6764
1367	61		het	31.8247
1386	68		het	24.7918
1233	60		het	9.6764	2.36824
1367	61		het	31.8247	1.06133
1386	68		het	24.7918	2.97666
			average	21.2127
	n=	16	SEM	2.26871
Voltage Clamp - 20 Hz Stimulation - Cholinergic Interneurons - Figure 3C
										Percentage of 1st response
mouse ID	psnt day		genotype	peak amp 1st peak	peak amp 2nd peak	peak amp 3rd peak	peak amp 4th peak	peak amp 5th peak		1st Peak	2nd Peak	3rd Peak	4th Peak	5th Peak
1482	63		ctrl	335.566	124.402	78.9678	56.0563	31.641		100	37.0723	23.5327	16.705	9.42914
1581	73		ctrl	122.793	69.7196	59.802	43.8485	35.7388		100	56.7782	48.7015	35.7093	29.1049
1581	73		ctrl	67.726	19.3087	17.4841	9.92146	9.24063		100	28.51	25.8159	14.6494	13.6441
1581	73		ctrl	79.0419	59.5661	43.8936	29.9032	17.9355		100	75.3602	55.5321	37.8321	22.6911
1586	72		ctrl	22.7827	18.9742	18.2108	15.6056	11.451		100	83.2834	79.9326	68.4976	50.2618
1590	60		ctrl	78.541	30.7808	23.9108	18.354	7.63528		100	39.1907	30.4437	23.3687	9.72139
rec15a	61		ctrl	36.5518	13.4676	6.11507	6.79582	7.1117		100	36.8452	16.7299	18.5923	19.4565
rec15a	61		ctrl	22.0371	11.7124	10.3136	10.8546	7.50298		100	53.1486	46.8011	49.256	34.047
rec15b	63		ctrl	130.878	38.7589	26.4567	16.5776	15.8255		100	29.6145	20.2148	12.6665	12.0918
rec16a	70		ctrl	55.1822	19.6882	16.7071	19.6155	15.3103		100	35.6785	30.2762	35.5468	27.745
			average	95.11	40.6379	30.1862	22.7533	15.9393		100	47.5482	37.798	31.2824	22.8193
	n=	10	SEM	29.2008	11.1849	7.42271	5.03821	3.20768		0	6.0426	6.23657	5.62542	4.08842
										Percentage of 1st response
mouse ID	psnt day		genotype	peak amp 1st peak	peak amp 2nd peak	peak amp 3rd peak	peak amp 4th peak	peak amp 5th peak		1st Peak	2nd Peak	3rd Peak	4th Peak	5th Peak
1467	67		het	52.0301	10.1477	10.1477	8.51042	9.28929		100	19.5035	19.5035	16.3567	17.8537
1483	72		het	187.853	45.266	33.3155	36.5402	29.4248		100	24.0965	17.7349	19.4515	15.6637
1484	64		het	78.0869	0	0	0	1.51551		100	0	0	0	1.9408
1484	64		het	92.592	1.205	3.78598	3.57988	3.06607		100	1.30141	4.08888	3.8663	3.31138
1500	76		het	129.671	63.0367	70.7563	41.5419	27.4904		100	48.6128	54.566	32.0364	21.2001
1595	70		het	79.0261	42.5798	48.4396	28.6563	26.6479		100	53.8807	61.2957	36.2618	33.7204
1501	68		het	131.819	13.2099	10.6471	12.0452	10.0628		100	10.0212	8.07706	9.13768	7.6338
rec16b	70		het	98.849	35.7613	35.8641	32.5545	18.9304		100	36.1777	36.2817	32.9336	19.1508
rec16c	74		het	92.5829	3.35144	0.734235	1.64531	0.804427		100	3.61993	0.793057	1.77712	0.868872
1766	69		het	125.194	6.20102	30.1599	28.4484	16.5339		100	4.95313	24.0905	22.7235	13.2066
			average	106.77	22.0759	24.385	19.3522	14.3765		100	20.2167	22.6431	17.4545	13.455
	n=	10	SEM	12.0737	7.12563	7.41135	4.98794	3.49034		0	6.31471	6.89743	4.27285	3.25776
Voltage Clamp - 20 Hz Stimulation - Spiny Projection Neurons - Figure 3C
										Percentage of 1st response
mouse ID	psnt day		genotype	peak amp 1st peak	peak amp 2nd peak	peak amp 3rd peak	peak amp 4th peak	peak amp 5th peak		1st Peak	2nd Peak	3rd Peak	4th Peak	5th Peak
rec15a Cell 3	61		ctrl	12.304	8.00501	3.37953	4.96264	3.52862		100	65.0602	27.4669	40.3336	28.6786
rec15a Cell 5	61		ctrl	27.2733	9.07966	7.16819	4.02001	3.71629		100	33.2914	26.2828	14.7397	13.6261
rec15b Cell 2	63		ctrl	17.5332	6.68796	7.5019	5.7079	3.11156		100	38.1445	42.7868	32.5548	17.7467
rec15b Cell 3	63		ctrl	31.1145	15.5037	9.97074	3.9466	1.91298		100	49.8279	32.0453	12.6841	6.14819
rec15b Cell 4	63		ctrl	34.6626	15.8377	1.95703	3.00445	1.47928		100	45.691	5.64594	8.6677	4.26765
rec16a Cell 1	70		ctrl	11.8477	7.11872	11.9537	13.6198	8.04028		100	60.0852	100.895	114.957	67.8636
rec16a Cell 3	70		ctrl	16.2357	13.9391	13.8786	7.97296	5.96163		100	85.8546	85.482	49.1076	36.7193
1931 Cell 2	62		ctrl	27.7506	11.299	19.6814	14.5802	11.009		100	40.7162	70.9224	52.5401	39.6712
1931 Cell 2	62		ctrl	54.5833	23.0086	20.7864	16.1169	8.15972		100	42.1532	38.082	29.5272	14.9491
1930 Cell 1	63		ctrl	40.7575	7.3514	3.77819	4.55432	2.00117		100	18.0369	9.26993	11.1742	4.90994
			average	27.4062	11.7831	10.0056	7.84858	4.89205		100	47.8861	43.8879	36.6286	23.458
	n=	10	SEM	4.31508	1.66706	2.08281	1.57802	1.02437		0	5.94149	10.0699	10.0594	6.3696
										Percentage of 1st response
mouse ID	psnt day		genotype	peak amp 1st peak	peak amp 2nd peak	peak amp 3rd peak	peak amp 4th peak	peak amp 5th peak		1st Peak	2nd Peak	3rd Peak	4th Peak	5th Peak
1749 Cell 2	60		het	17.7239	4.97388	6.67595	5.31989	3.73547		100	28.0631	37.6664	30.0153	21.0759
1749 Cell 3	60		het	37.6658	6.80134	5.24305	2.98612	2.70373		100	18.0571	13.9199	7.92793	7.17821
rec16b Cell 3	70		het	28.455	17.6227	18.335	12.697	9.93023		100	61.9318	64.4351	44.6213	34.898
1762 Cell 2	69		het	46.1345	6.14837	5.39252	4.0666	0.790129		100	13.3271	11.6887	8.81466	1.71266
1762 Cell 3	69		het	14.797	3.80014	2.08093	3.50975	3.43447		100	25.6818	14.0632	23.7193	23.2106
1766 Cell 2	69		het	13.0911	2.79211	1.95001	1.69467	3.21927		100	21.3283	14.8957	12.9452	24.5913
1764 Cell 3	87		het	17.5742	2.32	0.23	0.35	3.8		100	13.2012	1.30874	1.99156	21.6226
1927 Cell 1	66		het	32.4444	5.89455	6.28841	3.37785	2.74692		100	18.1682	19.3821	10.4112	8.46655
1933 Cell 1	63		het	59.4072	5.86264	8.7794	12.2837	7.35723		100	9.86857	14.7783	20.6771	12.3844
1934 Cell 1	69		het	11.288	4.32944	2.15952	2.35748	0.6399		100	38.3544	19.1311	20.8848	5.66885
			average	27.8581	6.05452	5.71348	4.86431	3.83573		100	24.7981	21.1269	18.2009	16.0809
	n=	10	SEM	5.07569	1.36735	1.63416	1.33967	0.894751		0	4.90411	5.59661	3.98063	3.33127
Curent Clamp - 20 Hz Stimulation - Cholinergic Interneuons - Figure 3D
mouseID	genotype		Baseline 2 sec	Post- Stimulation 0 - 0.5 ms	Post-Stimulation 0.5 - 1 ms	Fire Ratio 0 - 0.5 ms	Fire Ratio 0.5 - 1 ms
1047	CTRL		2.3	12.8	2.6	5.56522	1.13043
1098	CTRL		1.35	11	1	8.14815	0.740741
1983	CTRL		8.6	13.4	8.8	1.55814	1.02326
1985	CTRL		4.8	9.2	2.6	1.91667	0.541667
1985	CTRL		12.95	16.6	11.4	1.28185	0.880309
2000	CTRL		11.4	14	11.4	1.22807	1
2000	CTRL		3.5	11.6	1.4	3.31429	0.4
1246	CTRL		6.05	8.8	2.8	1.45455	0.46281
1248	CTRL		6.75	11.6	4.4	1.71852	0.651852
1253	CTRL		1.3	9.8	0.8	7.53846	0.615385
1253	CTRL		5.9	13	2	2.20339	0.338983
1253	CTRL		3.7	9.2	1.8	2.48649	0.486486
1313	CTRL		2.5	10.4	0.6	4.16	0.24
1313	CTRL		1.85	9	0.6	4.86486	0.324324
1323	CTRL		1.5	11.2	0	7.46667	0
1323	CTRL		0.8	10.8	0	13.5	0
n=	16	average	4.70312	11.4	3.2625	4.27533	0.552265
mice=	10	SEM	0.954597	0.55265	0.987336	0.887078	0.0882973
mouseID	genotype		Baseline 2 sec	Post- Stimulation 0 - 0.5 ms	Post-Stimulation 0.5 - 1 ms	Fire Ratio 0 - 0.5 ms	Fire Ratio 0.5 - 1 ms
1001	HET		2.35	7.4	0.4	3.14894	0.170213
1001	HET		3.3	4.6	3	1.39394	0.909091
1001	HET		3.9	7	3.6	1.79487	0.923077
1029	HET		5.3	6.6	4.2	1.24528	0.792453
1029	HET		2.25	5.6	3.8	2.48889	1.68889
1029	HET		1.8	3.2	1.2	1.77778	0.666667
1045	HET		4.05	14	2.2	3.45679	0.54321
1053	HET		2	8.8	0	4.4	0
1987	HET		9.55	13.6	5.6	1.42408	0.586387
1989	HET		2.9	5.8	2.2	2	0.758621
1999	HET		9.05	11.2	8.2	1.23757	0.906077
4071	HET		9.45	13	9	1.37566	0.952381
4076	HET		1.55	4.8	0	3.09677	0
4077	HET		2.6	3.2	1	1.23077	0.384615
4077	HET		2.15	8.4	3.2	3.90698	1.48837
1308	HET		2	3	2.2	1.5	1.1
1305	HET		2.5	3.8	0.8	1.52	0.32
1322	HET		3.7	5	3	1.35135	0.810811
1322	HET		3.1	5.4	3.4	1.74194	1.09677
n=	19	Average	3.86842	7.07368	3	2.11008	0.741981
mice=	13	SEM	0.614237	0.837576	0.585841	0.235316	0.106145
Curent Clamp - 20 Hz Stimulation - Cholinergic Interneuons - Figure 3E - firing ration in 250 ms window bewteen 0.5 and 1 sec
mouseID	genotype		Baseline 2 sec	Post- Stimulation 0.5-0.75 ms	Post-Stimulation 0.75 - 1 ms	Fire Ratio 0.5 - 0.75 ms	Fire Ratio 0.75-1ms
1047	CTRL		1.06667	1.6	0.4	1.5	0.375
1098	CTRL		0.716667	0.8	0.2	1.11628	0.27907
1983	CTRL		4.38333	4.4	4.2	1.0038	0.958175
1985	CTRL		2.5	1.4	1.2	0.56	0.48
1985	CTRL		6.45	6.4	5.2	0.992248	0.806202
2000	CTRL		5.75	5.8	6	1.0087	1.04348
2000	CTRL		1.68333	0.4	0.8	0.237624	0.475248
1246	CTRL		2.86667	0.4	2.2	0.139535	0.767442
1248	CTRL		3.4	2.2	2	0.647059	0.588235
1253	CTRL		0.666667	0.4	0.2	0.6	0.3
1253	CTRL		2.98333	1.4	0.8	0.469274	0.268156
1253	CTRL		1.78333	0.6	0.8	0.336449	0.448598
1313	CTRL		1.23333	0	0.6	0	0.486486
1313	CTRL		1.03333	0.4	0	0.387097	0
1323	CTRL		0.7	0	0	0	0
1323	CTRL		0.333333	0	0	0	0
n=	16	average	2.34688	1.6375	1.5375	0.562379	0.454756
mice=	10	SEM	0.480653	0.533406	0.49736	0.11732	0.0832035
mouseID	genotype		Baseline 2 sec	Post- Stimulation 0 - 0.5 ms	Post-Stimulation 0.5 - 1 ms	Fire Ratio 0 - 0.5 ms	Fire Ratio 0.5 - 1 ms
1001	HET		1.06667	0	0	0	0
1001	HET		1.56667	1.4	1.4	0.893617	0.893617
1001	HET		1.95	1.8	1.8	0.923077	0.923077
1029	HET		2.65	2.6	2.6	0.981132	0.981132
1029	HET		1.06667	2	2	1.875	1.875
1029	HET		0.9	0.8	0.8	0.888889	0.888889
1045	HET		2.13333	0.4	0.4	0.1875	0.1875
1053	HET		0.983333	0	0	0	0
1987	HET		4.95	3	3	0.606061	0.606061
1989	HET		1.45	1.4	1.4	0.965517	0.965517
1999	HET		4.45	4.2	4.2	0.94382	0.94382
4071	HET		4.86667	5.8	5.8	1.19178	1.19178
4076	HET		0.483333	0	0	0	0
4077	HET		1.35	0.2	0.2	0.148148	0.148148
4077	HET		1	1.4	1.4	1.4	1.4
1308	HET		1.05	1.8	1.8	1.71429	1.71429
1305	HET		1.41667	0.4	0.4	0.282353	0.282353
1322	HET		1.95	1	1	0.512821	0.512821
1322	HET		1.58333	1.6	1.6	1.01053	1.01053
n=	19	Average	1.94035	1.56842	1.56842	0.764449	0.764449
mice=	13	SEM	0.318735	0.356687	0.356687	0.133173	0.133173
STATISTICS
Figure 3B (ChL VC recordings) - Univariate Analysis of Variance - ANOVA 2 (genotype) x 2 (cell type) 0.1 Hz stimulation
Tests of Between-Subjects Effects
Dependent Variable:	Amplitude
Source	Type III Sum of Squares	df	Mean Square	F	Sig.	Partial Eta Squared	Noncent. Parameter	Observed Powerb
Corrected Model	24041.752a	3	8013.92	23.5579	3.37006e-10	0.540841	70.6737	1
Intercept	102352	1	102352	300.877	4.70902e-25	0.833738	300.877	1
genotype	862.891	1	862.891	2.53658	0.116491	0.0405615	2.53658	0.347453
celtype	22253.2	1	22253.2	65.416	3.46838e-11	0.521592	65.416	1
genotype * celtype	925.681	1	925.681	2.72115	0.104253	0.043385	2.72115	0.368317
Error	20410.8	60	340.179
Total	146805	64
Corrected Total	44452.5	63
Figure 3C (ChL VC recordings) -Amplitude of First responses in ChI and SPNs - Mann-Whitney U test
		Test Statisticsa
		celltype		peakamp
		ChI	Mann-Whitney U	30.5
			Wilcoxon W	85.5
			Z	-1.47517
			Asymp. Sig. (2-tailed)	0.140167
			Exact Sig. [2*(1-tailed Sig.)]	.143b
		SPN	Mann-Whitney U	48
			Wilcoxon W	103
			Z	-0.151186
			Asymp. Sig. (2-tailed)	0.879829
			Exact Sig. [2*(1-tailed Sig.)]	.912b
Figure 3C (ChL VC recordings) - Univariate Analysis of Variance - RM ANOVA 2 (genotype) x 4 (pulses) at 20 Hz stimulation for ChI and SPNs (percentage of first response)
ChI												SPN
Tests of Within-Subjects Effectsa													Tests of Within-Subjects Effectsa
Measure:	MEASURE_1												Measure:	MEASURE_1
Source		Type III Sum of Squares	df	Mean Square	F	Sig.	Partial Eta Squared	Noncent. Parameter	Observed Powerb				Source		Type III Sum of Squares	df	Mean Square	F	Sig.	Partial Eta Squared	Noncent. Parameter	Observed Powerb
pulses	Sphericity Assumed	2855.16	3	951.72	20.9373	3.96619e-09	0.537718	62.8119	1				pulses	Sphericity Assumed	3081.26	3	1027.09	7.73013	0.000219007	0.300431	23.1904	0.983222
	Greenhouse-Geisser	2855.16	1.74153	1639.45	20.9373	3.84684e-06	0.537718	36.463	0.999788					Greenhouse-Geisser	3081.26	2.13904	1440.49	7.73013	0.00121764	0.300431	16.535	0.943382
	Huynh-Feldt	2855.16	2.01929	1413.94	20.9373	8.36301e-07	0.537718	42.2786	0.999951					Huynh-Feldt	3081.26	2.57114	1198.4	7.73013	0.000513125	0.300431	19.8752	0.969017
	Lower-bound	2855.16	1	2855.16	20.9373	0.000234435	0.537718	20.9373	0.99087					Lower-bound	3081.26	1	3081.26	7.73013	0.0123464	0.300431	7.73013	0.748456
pulses * genotype	Sphericity Assumed	887.182	3	295.727	6.50584	0.000773164	0.265481	19.5175	0.960452				pulses * genotype	Sphericity Assumed	809.174	3	269.725	2.03002	0.120547	0.101349	6.09005	0.492845
	Greenhouse-Geisser	887.182	1.74153	509.427	6.50584	0.00590616	0.265481	11.3301	0.845137					Greenhouse-Geisser	809.174	2.13904	378.289	2.03002	0.142336	0.101349	4.34228	0.406128
	Huynh-Feldt	887.182	2.01929	439.353	6.50584	0.00375334	0.265481	13.1372	0.884286					Huynh-Feldt	809.174	2.57114	314.714	2.03002	0.131028	0.101349	5.21946	0.451092
	Lower-bound	887.182	1	887.182	6.50584	0.0200723	0.265481	6.50584	0.674717					Lower-bound	809.174	1	809.174	2.03002	0.171327	0.101349	2.03002	0.271178
Error(pulses)	Sphericity Assumed	2454.61	54	45.4557									Error(pulses)	Sphericity Assumed	7174.88	54	132.868
	Greenhouse-Geisser	2454.61	31.3476	78.303										Greenhouse-Geisser	7174.88	38.5027	186.348
	Huynh-Feldt	2454.61	36.3473	67.5321										Huynh-Feldt	7174.88	46.2805	155.03
	Lower-bound	2454.61	18	136.367										Lower-bound	7174.88	18	398.605
Tests of Between-Subjects Effectsa														Tests of Between-Subjects Effectsa
Measure:	MEASURE_1													Measure:	MEASURE_1
Transformed Variable:	Average													Transformed Variable:	Average
Source	Type III Sum of Squares	df	Mean Square	F	Sig.	Partial Eta Squared	Noncent. Parameter	Observed Powerb						Source	Type III Sum of Squares	df	Mean Square	F	Sig.	Partial Eta Squared	Noncent. Parameter	Observed Powerb
Intercept	56823.1	1	56823.1	53.3774	8.70402e-07	0.747819	53.3774	1						Intercept	67326.4	1	67326.4	47.8844	1.81189e-06	0.726794	47.8844	0.999997
genotype	5384.12	1	5384.12	5.05763	0.0372762	0.219347	5.05763	0.566782						genotype	6415.36	1	6415.36	4.56279	0.0466627	0.202226	4.56279	0.52458
Error	19162	18	1064.55											Error	25308.3	18	1406.02
Figure 3D (ChL CC recordings) - Univariate Analysis of Variance - Genotype effect on Firing Ratio between 0 to 0.5 sec
	Tests of Between-Subjects Effects
	Dependent Variable:	Ratio0to500
	Source	Type III Sum of Squares	df	Mean Square	F	Sig.	Partial Eta Squared	Noncent. Parameter	Observed Powerb
	Corrected Model	41.126a	1	41.1262	6.9729	0.0125439	0.174441	6.9729	0.726806
	Intercept	354.269	1	354.269	60.066	6.28521e-09	0.645413	60.066	1
	genotype	41.1262	1	41.1262	6.9729	0.0125439	0.174441	6.9729	0.726806
	Error	194.634	33	5.898
	Total	572.11	35
	Corrected Total	235.76	34
	a. R Squared = .174 (Adjusted R Squared = .149)
Figure 3D (ChL CC recordings) - Univariate Analysis of Variance - Genotype effect on Firing Ratio between 0.5 to 1 sec after stimulation
	Tests of Between-Subjects Effects
	Dependent Variable:	Ratio500to1k
	Source	Type III Sum of Squares	df	Mean Square	F	Sig.	Partial Eta Squared	Noncent. Parameter	Observed Powerb
	Corrected Model	.360a	1	0.360114	2.18181	0.149131	0.0620153	2.18181	0.299879
	Intercept	14.479	1	14.479	87.7233	8.13028e-11	0.726648	87.7233	1
	genotype	0.360114	1	0.360114	2.18181	0.149131	0.0620153	2.18181	0.299879
	Error	5.44674	33	0.165053
	Total	20.79	35
	Corrected Total	5.80686	34
	a. R Squared = .062 (Adjusted R Squared = .034)
Figure 3E (ChL CC recordings) - Univariate Analysis of Variance - Genotype effect on Firing Ratio between 0.5 to 1 sec after stimulation in 250 ms window
	one-way ANOVA
			Sum of Squares	df	Mean Square	F	Sig.
	window500	Between Groups	0.451362	1	0.451362	1.98476	0.168243
		Within Groups	7.50464	33	0.227413
		Total	7.956	34
	window750	Between Groups	0.785147	1	0.785147	3.51	0.0698784
		Within Groups	7.38171	33	0.223688
		Total	8.16686	34
