# Supplementary material for: Dopamine neuron dependent behaviors mediated by glutamate cotransmission
Source: eLife. 2017 Jul 13;6:e27566. doi: 10.7554/eLife.27566 (PMC5599237; doi:10.7554/eLife.27566)
Supplement: Figure 4—figure supplement 1—source data 1. — DOI: http://dx.doi.org/10.7554/eLife.27566.017 [file elife-27566-fig4-figsupp1-data1.xlsx]

## Sheet: Figure 4 Suppl 1
Dopamine Neuron Membrane Properties
SN										VTA
mouse ID	genotype	region	firing freq	Vrest	InputR	AP threshold				mouse ID	genotype	region	firing freq	Vrest	InputR	AP threshold
8061401	CTRL	SN	4.3	-57.1	308.02	-46.6				8061406	CTRL	VTA	3	-59.9	185.65	-43.3
8061403	CTRL	SN	2.8	-53.5	328.38	-41.3				8061419	CTRL	VTA	2.8	-58.1	141.77	-47.7
8061410	CTRL	SN	2.6	-58.3	139.24	-39.5				8061422	CTRL	VTA	2.5	-54.5	250.26	-40.5
8061413	CTRL	SN	3.7	-55.6	309.73	-37.4				8061401	CTRL	VTA	4.6	-50	342.87	-28.6
8061416	CTRL	SN	2.75	-52.7	473.81	-40.7				8061403	CTRL	VTA	5.5	-55.3	126.85	-39.4
8061406	CTRL	SN	5.8	-55.5	149.46	-40.2				8061418	CTRL	VTA	3.8	-55.2	192.4	-42.8
8061409	CTRL	SN	2.2	-58.8	126.16	-47				8061420	CTRL	VTA	6.6	-56.4	66.46	-41
8061412	CTRL	SN	2.6	-59.1	167.09	-44.7				8061423	CTRL	VTA	5.8	-55.3	312.74	-42.5
8061415	CTRL	SN	2.5	-59.1	181.01	-42.3				8061430	CTRL	VTA	4.4	-53	389.17	-36.8
8061426	CTRL	SN	7.4	-53.4	231.47	-41.8				8081401	CTRL	VTA	4.6	-60	113.92	-49
8081417	CTRL	SN	2.1	-57.9	329.54	-31.2				8081404	CTRL	VTA	3.2	-64	194.94	-50.1
8081420	CTRL	SN	4.5	-59.2	160.34	-43.4				8081407	CTRL	VTA	3.7	-54.6	216.46	-42
8081423	CTRL	SN	3.2	-55.8	151.9	-30.8				8081411	CTRL	VTA	2.5	-59.4	194.09	-41.9
8081426	CTRL	SN	2.9	-59.9	176.37	-45.5				8081414	CTRL	VTA	5.1	-58.1	197.47	-48.8
8081429	CTRL	SN	2.7	-53.1	367.09	-44.8						average	4.15	-56.7	208.932	-42.4571
		average	3.47	-56.6	239.974	-41.1467				n=	14	SEM	0.358622	0.972157	24.9143	1.55684
n=	15	SEM	0.394988	0.677556	28.0734	1.31634
8061433	cHET	SN	6.4	-58	274.27	-41.8				8061442	cHET	VTA	4.2	-56.3	410.77	-42.3
8061436	cHET	SN	2.7	-61	258.42	-44.5				8061446	cHET	VTA	7.1	-58.4	262.03	-48.5
8061439	cHET	SN	6.1	-59.3	219.84	-48.2				8061451	cHET	VTA	4.9	-51.7	96.84	-38.2
8061449	cHET	SN	4.3	-49.1	100.42	-41.6				8061454	cHET	VTA	5.4	-59	179.83	-47.5
8061460	cHET	SN	7.2	-57.2	270.25	-45.3				8061457	cHET	VTA	4.4	-56.9	136.29	-40.1
8061463	cHET	SN	5.5	-52.9	296.2	-44.2				8081432	cHET	VTA	4	-58.9	212.66	-41.3
8081451	cHET	SN	3	-58	203.72	-41				8081437	cHET	VTA	4.7	-63.2	361.47	-49.3
8081454	cHET	SN	2.7	-62.9	140.3	-47.2				8081440	cHET	VTA	2.9	-57.6	120.68	-44.9
8081457	cHET	SN	3.6	-53.4	200.84	-36.7				8081445	cHET	VTA	1.5	-60.3	192.41	-53.1
8081461	cHET	SN	6.1	-51.1	148.1	-41.7				8081448	cHET	VTA	3.7	-56.3	88.87	-34.7
8081464	cHET	SN	3.7	-61.8	120.25	-46.4				8091401	cHET	VTA	5.9	-63.4	192.41	-46.8
8081467	cHET	SN	5.2	-53.1	283.61	-39.7				8091404	cHET	VTA	4.1	-59.3	168.35	-44.5
8091416	cHET	SN	2.6	-61.5	199.37	-36				8091407	cHET	VTA	6.1	-54.6	208.86	-42.4
8091419	cHET	SN	4.2	-59.1	194	-40.5				8091410	cHET	VTA	3.3	-57	159.97	-39
8091422	cHET	SN	3.6	-54.6	126.85	-39.1				8091413	cHET	VTA	3.7	-52.9	306.78	-44.4
8091424	cHET	SN	2.6	-60.1	202.53	-42.9						average	4.39333	-57.72	206.548	-43.8
		average	4.34375	-57.0688	202.436	-42.3				n=	15	SEM	0.37053	0.87302	24.9295	1.28758
n=	16	SEM	0.396985	1.08184	16.1038	0.91292
STATISTICS
Figure 4—figure supplement 1 (membrane intrinsic properties of dopamine neurons) - Genotype effect for each region (VTA or SN)
Firing Frequency											Input R											Vrest											AP threshold
region = SN											region = SN											region = SN											region = SN
Tests of Between-Subjects Effectsa											Tests of Between-Subjects Effectsa											Tests of Between-Subjects Effectsa											Tests of Between-Subjects Effectsa
Dependent Variable:	firingFreq										Dependent Variable:	inputR										Dependent Variable:	Vrest										Dependent Variable:	APtreshold
Source	Type III Sum of Squares	df	Mean Square	F	Sig.	Partial Eta Squared	Noncent. Parameter	Observed Powerc			Source	Type III Sum of Squares	df	Mean Square	F	Sig.	Partial Eta Squared	Noncent. Parameter	Observed Powerc			Source	Type III Sum of Squares	df	Mean Square	F	Sig.	Partial Eta Squared	Noncent. Parameter	Observed Powerc			Source	Type III Sum of Squares	df	Mean Square	F	Sig.	Partial Eta Squared	Noncent. Parameter	Observed Powerc
Corrected Model	5.910b	1	5.9105	2.59553	0.117998	0.0821486	2.59553	0.344002			Corrected Model	10909.366b	1	10909.4	1.48658	0.232573	0.0487617	1.48658	0.218292			Corrected Model	1.701b	1	1.70111	0.139627	0.71137	0.00479165	0.139627	0.0650966			Corrected Model	10.298b	1	10.2982	0.566544	0.457702	0.0191616	0.566544	0.112579
Intercept	472.681	1	472.681	207.573	9.45676e-15	0.877416	207.573	1			Intercept	1.51529e+06	1	1.51529e+06	206.483	1.01146e-14	0.876849	206.483	1			Intercept	100030	1	100030	8210.48	3.90787e-37	0.99648	8210.48	1			Intercept	53909.8	1	53909.8	2965.8	9.25578e-31	0.990317	2965.8	1
genotype	5.9105	1	5.9105	2.59553	0.117998	0.0821486	2.59553	0.344002			genotype	10909.4	1	10909.4	1.48658	0.232573	0.0487617	1.48658	0.218292			genotype	1.70111	1	1.70111	0.139627	0.71137	0.00479165	0.139627	0.0650966			genotype	10.2982	1	10.2982	0.566544	0.457702	0.0191616	0.566544	0.112579
Error	66.0384	29	2.27719								Error	212819	29	7338.58								Error	353.314	29	12.1833								Error	527.137	29	18.1771
Total	548.543	31									Total	1.73231e+06	31									Total	100516	31									Total	54551.5	31
Corrected Total	71.9489	30									Corrected Total	223728	30									Corrected Total	355.015	30									Corrected Total	537.435	30
region = VTA											region = VTA											region = VTA											region = VTA
Tests of Between-Subjects Effectsa											Tests of Between-Subjects Effectsa											Tests of Between-Subjects Effectsa											Tests of Between-Subjects Effectsa
Dependent Variable:	firingFreq										Dependent Variable:	inputR										Dependent Variable:	Vrest										Dependent Variable:	APtreshold
Source	Type III Sum of Squares	df	Mean Square	F	Sig.	Partial Eta Squared	Noncent. Parameter	Observed Powerc			Source	Type III Sum of Squares	df	Mean Square	F	Sig.	Partial Eta Squared	Noncent. Parameter	Observed Powerc			Source	Type III Sum of Squares	df	Mean Square	F	Sig.	Partial Eta Squared	Noncent. Parameter	Observed Powerc			Source	Type III Sum of Squares	df	Mean Square	F	Sig.	Partial Eta Squared	Noncent. Parameter	Observed Powerc
Corrected Model	.429b	1	0.42877	0.237989	0.629601	0.00873738	0.237989	0.0757462			Corrected Model	41.226b	1	41.2257	0.0049097	0.944655	0.000181808	0.0049097	0.0505238			Corrected Model	7.534b	1	7.53393	0.658083	0.424331	0.0237935	0.658083	0.122587			Corrected Model	13.058b	1	13.0581	0.479977	0.494349	0.0174664	0.479977	0.102551
Intercept	528.538	1	528.538	293.364	4.97967e-16	0.915721	293.364	1			Intercept	1.25003e+06	1	1.25003e+06	148.87	1.69468e-12	0.846477	148.87	1			Intercept	94803.7	1	94803.7	8281.03	3.91817e-35	0.99675	8281.03	1			Intercept	53878	1	53878	1980.39	8.37238e-27	0.98655	1980.39	1
genotype	0.42877	1	0.42877	0.237989	0.629601	0.00873738	0.237989	0.0757462			genotype	41.2257	1	41.2257	0.0049097	0.944655	0.000181808	0.0049097	0.0505238			genotype	7.53393	1	7.53393	0.658083	0.424331	0.0237935	0.658083	0.122587			genotype	13.0581	1	13.0581	0.479977	0.494349	0.0174664	0.479977	0.102551
Error	48.6443	27	1.80164								Error	226713	27	8396.78								Error	309.104	27	11.4483								Error	734.554	27	27.2057
Total	579.28	29									Total	1.47777e+06	29									Total	95291.5	29									Total	54747.7	29
Corrected Total	49.0731	28									Corrected Total	226754	28									Corrected Total	316.638	28									Corrected Total	747.612	28
