# Supplementary material for: Dopamine neuron dependent behaviors mediated by glutamate cotransmission
Source: eLife. 2017 Jul 13;6:e27566. doi: 10.7554/eLife.27566 (PMC5599237; doi:10.7554/eLife.27566)
Supplement: Figure 4—figure supplement 2—source data 2. — DOI: http://dx.doi.org/10.7554/eLife.27566.019 [file elife-27566-fig4-figsupp2-data2.xlsx]

## Sheet: Figure 4 Suppl 2
Dopamine Release - Voltammetry
Nucleus Accumbens Core
Singles follow by a burst									Burst follow by a single
mouse ID	genotype	cell type	single 1	single 2	single 3	burst			mouse ID	genotype	cell type	single 1	single 2	single 3	burst
1310	CTRL	Core	0.5	0.17	0.17	0.74			1310	CTRL	Core	1.21	0.68	0.68	0.14
1795	CTRL	Core	1.02	0.31	0.31	1.13			1795	CTRL	Core	1.37	0.67	0.66	0.12
1848	CTRL	Core	0.72	0.24	0.25	0.33			1848	CTRL	Core	0.74	0.21	0.19	0.16
1849	CTRL	Core	0.7	0.24	0.25	0.25			1849	CTRL	Core	0.74	0.31	0.27	0.15
1970	CTRL	Core	0.3	0.13	0.11	0.18			1970	CTRL	Core	0.33	0.16	0.14	0.1
2554	CTRL	Core	0.3	0.11	0.1	0.46			2554	CTRL	Core	0.86	0.53	0.51	0.09
		average	0.59	0.2	0.198333	0.515					average	0.875	0.426667	0.408333	0.126667
n=	6	SEM	0.124932	0.034176	0.0379912	0.161065			n=	6	SEM	0.166247	0.103099	0.107011	0.0125433
mouse ID	genotype	cell type	single 1	single 2	single 3	burst			mouse ID	genotype	cell type	single 1	single 2	single 3	burst
1305	HET	Core	0.19	0.08	0.08	0.35			1305	HET	Core	0.56	0.33	0.31	0.07
1308	HET	Core	0.58	0.21	0.2	0.9			1308	HET	Core	1.34	0.86	0.85	0.18
1311	HET	Core	0.73	0.24	0.25	0.41			1311	HET	Core	0.88	0.32	0.31	0.17
1796	HET	Core	0.4	0.2	0.13	0.48			1796	HET	Core	1.29	0.75	0.66	0.19
1810	HET	Core	0.34	0.11	0.12	0.52			1810	HET	Core	0.85	0.51	0.49	0.11
1853	HET	Core	0.5	0.23	0.21	0.23			1853	HET	Core	0.42	0.27	0.23	0.13
1968	HET	Core	0.43	0.21	0.16	0.37			1968	HET	Core	0.72	0.42	0.39	0.15
2553	HET	Core	0.57	0.23	0.23	0.59			2553	HET	Core	1.15	0.69	0.61	0.18
		average	0.4675	0.18875	0.1725	0.48125					average	0.90125	0.51875	0.48125	0.1475
n=	8	SEM	0.0626539	0.0226272	0.0224745	0.0764636			n=	8	SEM	0.126933	0.0840417	0.0801386	0.0157467
Dorsal Striatum
Singles follow by a burst									Burst follow by a single
mouse ID	genotype	cell type	single 1	single 2	single 3	burst			mouse ID	genotype	cell type	single 1	single 2	single 3	burst
1310	CTRL	STR	0.57	0.22	0.24	0.43			1310	CTRL	STR	0.91	0.46	0.44	0.21
1795	CTRL	STR	0.93	0.4	0.46	0.7			1795	CTRL	STR	1.67	0.86	0.81	0.37
1848	CTRL	STR	0.74	0.24	0.26	0.25			1848	CTRL	STR	0.63	0.19	0.21	0.18
1849	CTRL	STR	0.35	0.14	0.13	0.1			1849	CTRL	STR	0.29	0.1	0.1	0.11
1970	CTRL	STR	0.6	0.24	0.23	0.4			1970	CTRL	STR	0.9	0.4	0.38	0.22
2554	CTRL	STR	0.67	0.25	0.25	0.31			2554	CTRL	STR	0.84	0.37	0.36	0.22
		average	0.643333	0.248333	0.261667	0.365					average	0.873333	0.396667	0.383333	0.218333
n=	6	SEM	0.0861472	0.0377801	0.0482839	0.0903659			n=	6	SEM	0.203699	0.118344	0.108836	0.0380964
mouse ID	genotype	cell type	single 1	single 2	single 3	burst			mouse ID	genotype	cell type	single 1	single 2	single 3	burst
1305	HET	STR	0.56	0.19	0.22	0.29			1305	HET	STR	0.81	0.29	0.28	0.21
1308	HET	STR	0.4	0.14	0.16	0.23			1308	HET	STR	0.51	0.22	0.21	0.14
1311	HET	STR	0.64	0.19	0.2	0.19			1311	HET	STR	0.59	0.19	0.19	0.13
1796	HET	STR	1.37	0.62	0.56	1.12			1796	HET	STR	2.16	1.26	1.19	0.57
1810	HET	STR	0.52	0.21	0.17	0.47			1810	HET	STR	0.95	0.45	0.4	0.16
1853	HET	STR	0.35	0.15	0.12	0.13			1853	HET	STR	0.31	0.12	0.1	0.12
1968	HET	STR	1.01	0.38	0.4	0.67			1968	HET	STR	1.54	0.81	0.73	0.32
2553	HET	STR	0.58	0.25	0.26	0.34			2553	HET	STR	0.75	0.37	0.34	0.24
		average	0.67875	0.26625	0.26125	0.43					average	0.9525	0.46375	0.43	0.23625
n=	8	SEM	0.129669	0.0610432	0.0557852	0.123767			n=	8	SEM	0.230552	0.146077	0.136576	0.0569618
STATISTICS
Figure 4—figure supplement 2 (Voltammetry) - RM ANOVA 4 (pulses) x 2 (genotype) for each region (Core and STR)
Singles + Burst												Burst + Single
region = Core												region = Core
Tests of Within-Subjects Effectsa												Tests of Within-Subjects Effectsa
Measure:	MEASURE_1											Measure:	MEASURE_1
Source		Type III Sum of Squares	df	Mean Square	F	Sig.	Partial Eta Squared	Noncent. Parameter	Observed Powerb			Source		Type III Sum of Squares	df	Mean Square	F	Sig.	Partial Eta Squared	Noncent. Parameter	Observed Powerb
pulses	Sphericity Assumed	1.44644	3	0.482148	22.9035	1.80715e-08	0.656195	68.7104	1			pulses	Sphericity Assumed	3.90807	3	1.30269	60.7903	3.63107e-14	0.835143	182.371	1
	Greenhouse-Geisser	1.44644	1.60717	0.899997	22.9035	1.99167e-05	0.656195	36.8097	0.999709				Greenhouse-Geisser	3.90807	1.29785	3.0112	60.7903	2.92687e-07	0.835143	78.8964	1
	Huynh-Feldt	1.44644	1.97254	0.733289	22.9035	3.13276e-06	0.656195	45.1781	0.999964				Huynh-Feldt	3.90807	1.5109	2.58659	60.7903	3.94127e-08	0.835143	91.8478	1
	Lower-bound	1.44644	1	1.44644	22.9035	0.00044418	0.656195	22.9035	0.992156				Lower-bound	3.90807	1	3.90807	60.7903	4.88798e-06	0.835143	60.7903	1
pulses * genotype	Sphericity Assumed	0.0263767	3	0.00879222	0.417656	0.741392	0.0336341	1.25297	0.124877			pulses * genotype	Sphericity Assumed	0.0134898	3	0.0044966	0.209835	0.888926	0.0171857	0.629504	0.0855222
	Greenhouse-Geisser	0.0263767	1.60717	0.0164119	0.417656	0.620911	0.0336341	0.671243	0.103201				Greenhouse-Geisser	0.0134898	1.29785	0.010394	0.209835	0.71628	0.0171857	0.272333	0.0734937
	Huynh-Feldt	0.0263767	1.97254	0.0133719	0.417656	0.660603	0.0336341	0.823846	0.109344				Huynh-Feldt	0.0134898	1.5109	0.00892835	0.209835	0.7511	0.0171857	0.317038	0.0752933
	Lower-bound	0.0263767	1	0.0263767	0.417656	0.530275	0.0336341	0.417656	0.0915877				Lower-bound	0.0134898	1	0.0134898	0.209835	0.655081	0.0171857	0.209835	0.0706953
Error(pulses)	Sphericity Assumed	0.757848	36	0.0210513								Error(pulses)	Sphericity Assumed	0.771453	36	0.0214293
	Greenhouse-Geisser	0.757848	19.286	0.0392952									Greenhouse-Geisser	0.771453	15.5741	0.0495342
	Huynh-Feldt	0.757848	23.6705	0.0320165									Huynh-Feldt	0.771453	18.1307	0.0425495
	Lower-bound	0.757848	12	0.063154									Lower-bound	0.771453	12	0.0642878
Tests of Between-Subjects Effectsa												Tests of Between-Subjects Effectsa
Measure:	MEASURE_1											Measure:	MEASURE_1
Transformed Variable:	Average											Transformed Variable:	Average
Source	Type III Sum of Squares	df	Mean Square	F	Sig.	Partial Eta Squared	Noncent. Parameter	Observed Powerb				Source	Type III Sum of Squares	df	Mean Square	F	Sig.	Partial Eta Squared	Noncent. Parameter	Observed Powerb
Intercept	6.76732	1	6.76732	93.1873	5.23604e-07	0.885918	93.1873	1				Intercept	12.9483	1	12.9483	80.0784	1.17281e-06	0.869676	80.0784	1
genotype	0.0313909	1	0.0313909	0.432259	0.523294	0.0347692	0.432259	0.0930684				genotype	0.0401991	1	0.0401991	0.248611	0.627069	0.0202971	0.248611	0.0745661
Error	0.871447	12	0.0726206									Error	1.94034	12	0.161695
region = STR												region = STR
Tests of Within-Subjects Effectsa												Tests of Within-Subjects Effectsa
Measure:	MEASURE_1											Measure:	MEASURE_1
Source		Type III Sum of Squares	df	Mean Square	F	Sig.	Partial Eta Squared	Noncent. Parameter	Observed Powerb			Source		Type III Sum of Squares	df	Mean Square	F	Sig.	Partial Eta Squared	Noncent. Parameter	Observed Powerb
pulses	Sphericity Assumed	1.46401	3	0.488003	48.5188	9.88613e-13	0.801714	145.556	1			pulses	Sphericity Assumed	3.52338	3	1.17446	37.2567	3.91622e-11	0.756378	111.77	1
	Greenhouse-Geisser	1.46401	1.63433	0.895786	48.5188	7.61182e-08	0.801714	79.2956	1				Greenhouse-Geisser	3.52338	1.03397	3.40762	37.2567	4.15824e-05	0.756378	38.5224	0.999888
	Huynh-Feldt	1.46401	2.0144	0.726772	48.5188	3.27991e-09	0.801714	97.7361	1				Huynh-Feldt	3.52338	1.13766	3.09704	37.2567	1.97973e-05	0.756378	42.3854	0.99996
	Lower-bound	1.46401	1	1.46401	48.5188	1.50538e-05	0.801714	48.5188	0.999994				Lower-bound	3.52338	1	3.52338	37.2567	5.30514e-05	0.756378	37.2567	0.999845
pulses * genotype	Sphericity Assumed	0.00783569	3	0.0026119	0.259683	0.853934	0.0211819	0.779049	0.0946204			pulses * genotype	Sphericity Assumed	0.00788607	3	0.00262869	0.0833884	0.96866	0.00690108	0.250165	0.0635453
	Greenhouse-Geisser	0.00783569	1.63433	0.00479445	0.259683	0.729809	0.0211819	0.424407	0.0827363				Greenhouse-Geisser	0.00788607	1.03397	0.00762697	0.0833884	0.785885	0.00690108	0.0862213	0.0583002
	Huynh-Feldt	0.00783569	2.0144	0.00388984	0.259683	0.774952	0.0211819	0.523105	0.0863529				Huynh-Feldt	0.00788607	1.13766	0.00693184	0.0833884	0.808773	0.00690108	0.0948676	0.0586799
	Lower-bound	0.00783569	1	0.00783569	0.259683	0.619579	0.0211819	0.259683	0.0756739				Lower-bound	0.00788607	1	0.00788607	0.0833884	0.777685	0.00690108	0.0833884	0.0581707
Error(pulses)	Sphericity Assumed	0.362089	36	0.010058								Error(pulses)	Sphericity Assumed	1.13484	36	0.0315235
	Greenhouse-Geisser	0.362089	19.6119	0.0184627									Greenhouse-Geisser	1.13484	12.4077	0.0914632
	Huynh-Feldt	0.362089	24.1728	0.0149792									Huynh-Feldt	1.13484	13.6519	0.0831272
	Lower-bound	0.362089	12	0.0301741									Lower-bound	1.13484	12	0.0945704
Tests of Between-Subjects Effectsa												Tests of Between-Subjects Effectsa
Measure:	MEASURE_1											Measure:	MEASURE_1
Transformed Variable:	Average											Transformed Variable:	Average
Source	Type III Sum of Squares	df	Mean Square	F	Sig.	Partial Eta Squared	Noncent. Parameter	Observed Powerb				Source	Type III Sum of Squares	df	Mean Square	F	Sig.	Partial Eta Squared	Noncent. Parameter	Observed Powerb
Intercept	8.5418	1	8.5418	50.2425	1.26832e-05	0.807206	50.2425	0.999996				Intercept	13.4074	1	13.4074	30.226	0.000136733	0.715815	30.226	0.998892
genotype	0.0122713	1	0.0122713	0.0721792	0.792753	0.00597897	0.0721792	0.0570681				genotype	0.0371016	1	0.0371016	0.0836426	0.777356	0.00692197	0.0836426	0.0581957
Error	2.04014	12	0.170011									Error	5.32287	12	0.443572
