# Supplementary material for: Dopamine neuron dependent behaviors mediated by glutamate cotransmission
Source: eLife. 2017 Jul 13;6:e27566. doi: 10.7554/eLife.27566 (PMC5599237; doi:10.7554/eLife.27566)
Supplement: Figure 4—source data 1. — DOI: http://dx.doi.org/10.7554/eLife.27566.015 [file elife-27566-fig4-data1.xlsx]

## Sheet: Figure 4A,4B & 4D
Dopamine Neuron Measures
Stereology of TH cells - Figure 4A
Ventral Tegmental Area (VTA)
Mouse Number	Genotype	DA Neurons
3663	HET	6370.38
3683	HET	8487.46
3699	HET	7456.28
3703	HET	6928.07
	HET Average:	7310.55	450.607
3674	CTRL	7221.09
3684	CTRL	8772.17
3686	CTRL	7319.67
3700	CTRL	6878.04
	CTRL Average:	7547.74	418.971
Substantia Nigra (SN)
Mouse Number	Genotype	DA Neurons
3663	HET	6355.3
3683	HET	8263.75
3699	HET	6631.91
3703	HET	5873.73
	HET Average:	6781.17	518.422
3674	CTRL	7452.89
3684	CTRL	6626.79
3686	CTRL	5631
3700	CTRL	6669.41
	CTRL Average:	6595.02	373.254
Ventral Midbrain (VTA+SN)
Mouse Number	Genotype	DA Neurons
3663	HET	12725.7
3683	HET	16751.2
3699	HET	14088.2
3703	HET	12801.8
	HET Average:	14091.7	939.985
3674	CTRL	14674
3684	CTRL	15399
3686	CTRL	12950.7
3700	CTRL	13547.5
	CTRL Average:	14142.8	550.432
STATISTICS
Figure 4A (Stereology of TH neurons) - Univariate Analysis of Variance - Genotype effect
VTA											SN
Tests of Between-Subjects Effectsa											Tests of Between-Subjects Effectsa
Dependent Variable:	cellcounts										Dependent Variable:	cellcounts
Source	Type III Sum of Squares	df	Mean Square	F	Sig.	Partial Eta Squared	Noncent. Parameter	Observed Powerc			Source	Type III Sum of Squares	df	Mean Square	F	Sig.	Partial Eta Squared	Noncent. Parameter	Observed Powerc
Corrected Model	112522.936b	1	112523	0.14861	0.713164	0.0241697	0.14861	0.0624196			Corrected Model	69303.645b	1	69303.6	0.0849144	0.780557	0.0139549	0.0849144	0.0570791
Intercept	4.41538e+08	1	4.41538e+08	583.143	3.31365e-07	0.989816	583.143	1			Intercept	3.57845e+08	1	3.57845e+08	438.45	7.7276e-07	0.9865	438.45	1
genotype	112523	1	112523	0.14861	0.713164	0.0241697	0.14861	0.0624196			genotype	69303.6	1	69303.6	0.0849144	0.780557	0.0139549	0.0849144	0.0570791
Error	4.54301e+06	6	757168								Error	4.89695e+06	6	816159
Total	4.46193e+08	8									Total	3.62811e+08	8
Corrected Total	4.65553e+06	7									Corrected Total	4.96626e+06	7
DA content and Turnover - Figure 4B
				FW							ng/mg tissue ([HPLC concentration*0.00025*FW]/mg tissue)
				153	168	182
STRIATUM
		Genotype	Region	DA	DOPAC	HVA		Weight of region (mg)	Sample volume (liters)		DA	DOPAC	HVA	DOPAC/DA	HVA/DA
	3040	CTRL	Striatum	969.218	52.083	73.795		1.8	0.00025		20.5959	1.21527	1.86537	0.0590055	0.0905702
	3041	CTRL	Striatum	755.217	36.88	77.527		2.3	0.00025		12.5596	0.673461	1.53369	0.0536213	0.122113
	3126	CTRL	Striatum	839.784	45.11	62.563		2.2	0.00025		14.6008	0.861191	1.29392	0.0589825	0.0886196
	3127	CTRL	Striatum	563.113	39.34	50.343		1.2	0.00025		17.9492	1.3769	1.90884	0.0767108	0.106347
	3173	CTRL	Striatum	928.242	56.75	104.749		2	0.00025		17.7526	1.19175	2.38304	0.0671309	0.134236
	3219	CTRL	Striatum	853.101	54.241	125.187		2.1	0.00025		15.5386	1.08482	2.71238	0.0698144	0.174558
	C	CTRL	Striatum	709.97	45.69	48.657		1.5	0.00025		18.1042	1.27932	1.47593	0.0706641	0.081524
	G	CTRL	Striatum	999.025	41.092	69.229		1.6	0.00025		23.8829	1.07866	1.9687	0.0451647	0.0824312
	H	CTRL	Striatum	1176.18	64.922	158.203		3.1	0.00025		14.5126	0.879588	2.32201	0.0606088	0.16
										AVG	17.2774	1.07122	1.94043	0.0624114	0.1156
										SEM	1.22536	0.080167	0.165077	0.00342551	0.0122081
	3072	CHET	Striatum	678.212	55.684	69.335		4.8	0.00025		5.4045	0.487235	0.657238	0.0901535	0.121609
	3116	CHET	Striatum	979.474	60.306	70.029		3.2	0.00025		11.7078	0.791516	0.995725	0.067606	0.0850482
	3118	CHET	Striatum	1075.37	62.955	87.309		2.4	0.00025		17.1388	1.10171	1.65523	0.0642819	0.0965784
	3122	CHET	Striatum	922.655	85.112	109.484		3.9	0.00025		9.04912	0.916591	1.27731	0.101291	0.141153
	3128	CHET	Striatum	1221.11	113.813	91.367		2.5	0.00025		18.683	1.91206	1.66288	0.102342	0.0890051
	3178	CHET	Striatum	682.957	45.321	101.709		2.1	0.00025		12.4396	0.90642	2.2037	0.0728658	0.177152
	3217	CHET	Striatum	322.038	15.449	41.851		0.8	0.00025		15.3974	0.811072	2.38028	0.0526758	0.154589
	B	CHET	Striatum	517.57	43.014	34.379		2	0.00025		9.89853	0.903294	0.782122	0.0912554	0.079014
	D	CHET	Striatum	1030.44	53.4	85.33		1.2	0.00025		32.8451	1.869	3.23543	0.0569034	0.0985055
	E	CHET	Striatum	1159.69	49.81	96.85		1.9	0.00025		23.3464	1.10106	2.3193	0.047162	0.099343
	F	CHET	Striatum	1779.63	79.486	162.449		2.7	0.00025		25.2114	1.23645	2.73757	0.0490433	0.108584
										AVG	16.4656	1.09422	1.80971	0.0723255	0.113689
										SEM	2.56507	0.139032	0.264757	0.00655946	0.00995214
NUCLEUS ACCUMBENS
		Genotype	Region	DA	DOPAC	HVA		Weight of region (mg)	Sample volume (liters)		DA	DOPAC	HVA	DOPAC/DA	HVA/DA
	3040	CTRL	Nucleus Accumbens	466.213	43.837	41.937		2.4	0.00025		7.43027	0.767147	0.795056	0.103246	0.107002
	3041	CTRL	Nucleus Accumbens	437.052	43.486	42.775		2.2	0.00025		7.59875	0.830187	0.884665	0.109253	0.116422
	3088	CTRL	Nucleus Accumbens1	584.208	67.001	46.594		4.2	0.00025		5.32047	0.67001	0.504768	0.125931	0.094873
	3126	CTRL	Nucleus Accumbens	527.214	47.76	45.079		2.9	0.00025		6.95377	0.691697	0.707274	0.0994707	0.101711
	3127	CTRL	Nucleus Accumbens	703.047	83.42	72.9		2.3	0.00025		11.692	1.52332	1.44215	0.130288	0.123345
	3173	CTRL	Nucleus Accumbens	448.122	57.961	67.864		1.9	0.00025		9.0214	1.28124	1.62516	0.142023	0.180145
	3219	CTRL	Nucleus Accumbens	543.093	51.135	64.233		2.4	0.00025		8.65554	0.894863	1.21775	0.103386	0.14069
	C	CTRL	Nucleus Accumbens	506.441	44.526	35.89		1.9	0.00025		10.1955	0.984259	0.859471	0.096539	0.0842994
	G	CTRL	Nucleus Accumbens	868.875	58.278	68.552		2	0.00025		16.6172	1.22384	1.55956	0.0736487	0.0938518
	H	CTRL	Nucleus Accumbens	752.85	76.212	107.702		5	0.00025		5.7593	0.640181	0.980088	0.111156	0.170175
										AVG	8.92442	0.950675	1.05759	0.109494	0.121252
										SEM	1.10786	0.0997843	0.12766	0.00647216	0.0109231
	3072	CHET	Nucleus Accumbens	335.027	38.281	24.846		3.3	0.00025		3.88327	0.487213	0.342574	0.125465	0.0882179
	3082	CHET	Nucleus Accumbens	318.727	32.812	37.541		3.5	0.00025		3.48323	0.393744	0.488033	0.11304	0.140109
	3084	CHET	Nucleus Accumbens2	1016.05	133.789	79.99		3.6	0.00025		10.7955	1.56087	1.01098	0.144585	0.0936487
	3090	CHET	Nucleus Accumbens	512.47	54.465	43.967		2.5	0.00025		7.84079	0.915012	0.800199	0.116699	0.102056
	3116	CHET	Nucleus Accumbens	643.269	56.766	60.667		1.9	0.00025		12.95	1.25483	1.45282	0.0968977	0.112186
	3175	CHET	Nucleus Accumbens	164.874	19.64	27.747		0.5	0.00025		12.6129	1.64976	2.52498	0.1308	0.200191
	3178	CHET	Nucleus Accumbens	310.128	42.091	43.319		2.7	0.00025		4.39348	0.654749	0.730005	0.149027	0.166157
	3217	CHET	Nucleus Accumbens	343.282	48.223	50.535		1.3	0.00025		10.1004	1.55797	1.76872	0.154249	0.175114
	B	CHET	Nucleus Accumbens	565.919	74.911	56.6		2.3	0.00025		9.41148	1.36794	1.1197	0.145348	0.118971
	D	CHET	Nucleus Accumbens	574.711	67.7	66.602		2.7	0.00025		8.14174	1.05311	1.12237	0.129347	0.137853
	E	CHET	Nucleus Accumbens	723.727	67.159	64.192		2.7	0.00025		10.2528	1.0447	1.08175	0.101894	0.105508
	F	CHET	Nucleus Accumbens	528.727	42.705	58.056		2.3	0.00025		8.79296	0.77983	1.1485	0.088688	0.130616
										AVG	8.55488	1.05998	1.13255	0.12467	0.130886
										SEM	0.963852	0.129061	0.176654	0.00651509	0.0104885
STATISTICS
Figure 4B (DA content and DOPAC/DA ratio) - Univariate Analysis of Variance - Genotype effect
NAc											STR
Tests of Between-Subjects Effectsa											Tests of Between-Subjects Effectsa
Dependent Variable:	DAcontent										Dependent Variable:	DAcontent
Source	Type III Sum of Squares	df	Mean Square	F	Sig.	Partial Eta Squared	Noncent. Parameter	Observed Powerc			Source	Type III Sum of Squares	df	Mean Square	F	Sig.	Partial Eta Squared	Noncent. Parameter	Observed Powerc
Corrected Model	.745b	1	0.744912	0.0703307	0.79357	0.00350421	0.0703307	0.0573476			Corrected Model	3.263b	1	3.2631	0.0778979	0.783348	0.00430901	0.0778979	0.0580544
Intercept	1666.46	1	1666.46	157.338	6.19132e-11	0.887221	157.338	1			Intercept	5636.08	1	5636.08	134.547	8.69978e-10	0.882003	134.547	1
genotype	0.744912	1	0.744912	0.0703307	0.79357	0.00350421	0.0703307	0.0573476			genotype	3.2631	1	3.2631	0.0778979	0.783348	0.00430901	0.0778979	0.0580544
Error	211.831	20	10.5916								Error	754.011	18	41.8895
Total	1886.47	22									Total	6422.92	20
Corrected Total	212.576	21									Corrected Total	757.274	19
Tests of Between-Subjects Effectsa											Tests of Between-Subjects Effectsa
Dependent Variable:	Ratio										Dependent Variable:	Ratio
Source	Type III Sum of Squares	df	Mean Square	F	Sig.	Partial Eta Squared	Noncent. Parameter	Observed Powerc			Source	Type III Sum of Squares	df	Mean Square	F	Sig.	Partial Eta Squared	Noncent. Parameter	Observed Powerc
Corrected Model	.001b	1	0.0012713	3.01003	0.0981361	0.130814	3.01003	0.379112			Corrected Model	.000b	1	0.000467396	1.67913	0.211411	0.0853255	1.67913	0.232601
Intercept	0.298839	1	0.298839	707.558	4.39664e-17	0.972511	707.558	1			Intercept	0.0899844	1	0.0899844	323.271	6.00338e-13	0.947256	323.271	1
genotype	0.0012713	1	0.0012713	3.01003	0.0981361	0.130814	3.01003	0.379112			genotype	0.000467396	1	0.000467396	1.67913	0.211411	0.0853255	1.67913	0.232601
Error	0.00844707	20	0.000422353								Error	0.0050104	18	0.000278356
Total	0.314632	22									Total	0.097686	20
Corrected Total	0.00971836	21									Corrected Total	0.0054778	19
DA release - Voltammetry - Figure 4D
Singles follow by a burst										Burst follow by a single
mouse ID	genotype	cell type	single 1	single 2	single 3	burst	Decay time First Single			mouse ID	genotype	cell type	single 1	single 2	single 3	burst	Decay time First burst
1208	CTRL	Shell	0.2	0.08	0.07	0.41	0.42			1208	CTRL	Shell	0.64	0.42	0.39	0.06	0.62
1208	CTRL	Shell	0.18	0.06	0.07	0.35	0.38			1208	CTRL	Shell	0.56	0.39	0.39	0.05	0.58
1213	CTRL	Shell	0.17	0.09	0.08	0.35	0.41			1213	CTRL	Shell	0.52	0.35	0.35	0.07	0.56
1213	CTRL	Shell	0.17	0.09	0.08	0.35	0.41			1213	CTRL	Shell	0.37	0.26	0.24	0	0.56
1220	CTRL	Shell	0.14	0.05	0.06	0.2	0.54			1220	CTRL	Shell	0.33	0.24	0.21	0.05	0.64
1220	CTRL	Shell	0.08	0.04	0	0.17	0.61			1220	CTRL	Shell	0.22	0.15	0.16	0.04	0.6
1238	CTRL	Shell	0.23	0.13	0.11	0.51	0.33			1238	CTRL	Shell	0.65	0.49	0.52	0.1	0.46
1238	CTRL	Shell	0.23	0.13	0.11	0.51	0.33			1252	CTRL	Shell	0.31	0.23	0.24	0.04	0.42
1252	CTRL	Shell	0.12	0.05	0.05	0.23	0.34			1252	CTRL	Shell	0.34	0.25	0.23	0.06	0.42
1252	CTRL	Shell	0.14	0.07	0.07	0.24	0.32					average	0.437778	0.308889	0.303333	0.0522222	0.54
		average	0.166	0.079	0.07	0.332	0.409			n=	9	SEM	0.0555028	0.0386266	0.0408503	0.00948317	0.03
n=	10	SEM	0.0158854	0.0105935	0.0104231	0.0405152	0.0321436
mouse ID	genotype	cell type	single 1	single 2	single 3	burst	Decay time First Single			mouse ID	genotype	cell type	single 1	single 2	single 3	burst	Decay time First Single
1197	HET	Shell	0.34	0.14	0.15	0.69	0.24			1197	HET	Shell	0.94	0.72	0.7	0.15	0.38
1204	HET	Shell	0.15	0.07	0.06	0.23	0.37			1204	HET	Shell	0.39	0.27	0.25	0.04	0.49
1204	HET	Shell	0.19	0.09	0.08	0.42	0.34			1204	HET	Shell	0.58	0.44	0.4	0.07	0.54
1210	HET	Shell	0.07	0.03	0.03	0.17	0.47			1210	HET	Shell	0.24	0.14	0.15	0.03	0.6
1210	HET	Shell	0.13	0.07	0.07	0.28	0.44			1210	HET	Shell	0.38	0.26	0.27	0.05	0.56
1215	HET	Shell	0.04	0	0	0.11	0.46			1215	HET	Shell	0.12	0.09	0.09	0	0.63
1215	HET	Shell	0.11	0.05	0.05	0.19	0.59			1215	HET	Shell	0.31	0.19	0.22	0.04	0.56
1240	HET	Shell	0.17	0.09	0.08	0.35	0.33			1240	HET	Shell	0.48	0.36	0.36	0.07	0.56
1240	HET	Shell	0.14	0.07	0.07	0.31	0.4			1240	HET	Shell	0.4	0.29	0.29	0.06	0.56
1241	HET	Shell	0.23	0.09	0.09	0.44	0.33			1241	HET	Shell	0.61	0.43	0.43	0.08	0.46
1241	HET	Shell	0.13	0.07	0.05	0.27	0.34			1241	HET	Shell	0.25	0.18	0.17	0.06	0.33
1242	HET	Shell	0.24	0.11	0.1	0.29	0.24			1242	HET	Shell	0.47	0.37	0.34	0.1	0.39
1242	HET	Shell	0.21	0.09	0.09	0.35	0.25			1242	HET	Shell	0.54	0.37	0.34	0.06	0.39
1251	HET	Shell	0.14	0.1	0.08	0.27	0.27			1251	HET	Shell	0.37	0.34	0.32	0.09	0.37
1251	HET	Shell	0.14	0.06	0.07	0.3	0.37			1251	HET	Shell	0.37	0.28	0.28	0.06	0.41
		average	0.162	0.0753333	0.0713333	0.311333	0.362667					average	0.43	0.315333	0.307333	0.064	0.482
n=	15	SEM	0.0195928	0.0089138	0.00897085	0.0365316	0.0262147			n=	15	SEM	0.0516266	0.0406311	0.0382722	0.00913616	0.0259749
STATISTICS
Figure 4D (DA Voltammetry) - Univariate Analysis of Variance - RM ANOVA 4(pulses) x 2 (genotype)
Singles plus Burst												Burst plus Single
Tests of Within-Subjects Effectsa												Tests of Within-Subjects Effectsa
Measure:	MEASURE_1											Measure:	MEASURE_1
Source		Type III Sum of Squares	df	Mean Square	F	Sig.	Partial Eta Squared	Noncent. Parameter	Observed Powerb			Source		Type III Sum of Squares	df	Mean Square	F	Sig.	Partial Eta Squared	Noncent. Parameter	Observed Powerb
pulses	Sphericity Assumed	0.985377	3	0.328459	135.12	8.08268e-29	0.85454	405.359	1			pulses	Sphericity Assumed	1.67261	3	0.557536	124.565	4.0117e-27	0.849896	373.696	1
	Greenhouse-Geisser	0.985377	1.09715	0.898128	135.12	5.67235e-12	0.85454	148.246	1				Greenhouse-Geisser	1.67261	1.08665	1.53923	124.565	2.98355e-11	0.849896	135.359	1
	Huynh-Feldt	0.985377	1.16097	0.848751	135.12	1.53348e-12	0.85454	156.87	1				Huynh-Feldt	1.67261	1.1514	1.45267	124.565	8.60111e-12	0.849896	143.425	1
	Lower-bound	0.985377	1	0.985377	135.12	4.16021e-11	0.85454	135.12	1				Lower-bound	1.67261	1	1.67261	124.565	1.57861e-10	0.849896	124.565	1
pulses * genotype	Sphericity Assumed	0.00179817	3	0.00059939	0.246573	0.863502	0.0106069	0.73972	0.0945339			pulses * genotype	Sphericity Assumed	0.00137779	3	0.000459264	0.102609	0.958247	0.00464241	0.307828	0.0676208
	Greenhouse-Geisser	0.00179817	1.09715	0.00163895	0.246573	0.645934	0.0106069	0.270527	0.0775047				Greenhouse-Geisser	0.00137779	1.08665	0.00126792	0.102609	0.772563	0.00464241	0.111501	0.0612414
	Huynh-Feldt	0.00179817	1.16097	0.00154885	0.246573	0.659166	0.0106069	0.286265	0.0782335				Huynh-Feldt	0.00137779	1.1514	0.00119662	0.102609	0.786739	0.00464241	0.118145	0.0615318
	Lower-bound	0.00179817	1	0.00179817	0.246573	0.624211	0.0106069	0.246573	0.0763518				Lower-bound	0.00137779	1	0.00137779	0.102609	0.751743	0.00464241	0.102609	0.0608358
Error(pulses)	Sphericity Assumed	0.167731	69	0.00243088								Error(pulses)	Sphericity Assumed	0.295406	66	0.00447585
	Greenhouse-Geisser	0.167731	25.2343	0.00664692									Greenhouse-Geisser	0.295406	23.9064	0.0123568
	Huynh-Feldt	0.167731	26.7024	0.00628148									Huynh-Feldt	0.295406	25.3309	0.0116619
	Lower-bound	0.167731	23	0.00729263									Lower-bound	0.295406	22	0.0134276
Tests of Between-Subjects Effectsa												Tests of Between-Subjects Effectsa
Measure:	MEASURE_1											Measure:	MEASURE_1
Transformed Variable:	Average											Transformed Variable:	Average
Source	Type III Sum of Squares	df	Mean Square	F	Sig.	Partial Eta Squared	Noncent. Parameter	Observed Powerb				Source	Type III Sum of Squares	df	Mean Square	F	Sig.	Partial Eta Squared	Noncent. Parameter	Observed Powerb
Intercept	2.40957	1	2.40957	153.31	1.17986e-11	0.869548	153.31	1				Intercept	6.93351	1	6.93351	122.063	1.91047e-10	0.847289	122.063	1
genotype	0.00108666	1	0.00108666	0.0691391	0.794935	0.00299704	0.0691391	0.0573147				genotype	0.000245991	1	0.000245991	0.00433063	0.948125	0.000196808	0.00433063	0.0504546
Error	0.361491	23	0.015717									Error	1.24966	22	0.0568026
First Single decay time												First Burst decay time
Tests of Between-Subjects Effects												Tests of Between-Subjects Effects
Dependent Variable:	TAUsingle1											Dependent Variable:	TAUburst1
region		Type III Sum of Squares	df	Mean Square	F	Sig.						region		Type III Sum of Squares	df	Mean Square	F	Sig.
Shell	Corrected Model	.014b	1	0.0137506	1.42577	0.244627						Shell	Corrected Model	.018b	1	0.0182212	2.11819	0.15968
	Intercept	3.56572	1	3.56572	369.721	1.13839e-15							Intercept	5.87709	1	5.87709	683.205	4.64815e-18
	genotype	0.0137506	1	0.0137506	1.42577	0.244627							genotype	0.0182212	1	0.0182212	2.11819	0.15968
	Error	0.22182	23	0.00964436									Error	0.189249	22	0.00860224
	Total	3.85818	25										Total	6.30305	24
	Corrected Total	0.235571	24										Corrected Total	0.207471	23
