# Supplementary material for: Dopamine neuron dependent behaviors mediated by glutamate cotransmission
Source: eLife. 2017 Jul 13;6:e27566. doi: 10.7554/eLife.27566 (PMC5599237; doi:10.7554/eLife.27566)
Supplement: Figure 5—source data 1. — DOI: http://dx.doi.org/10.7554/eLife.27566.021 [file elife-27566-fig5-data1.xlsx]

## Sheet: Figure 5A-5E
Dopamine Neuron Dependent Behaviors
Rotarod - Figure 5A
	Rotarod 20 rpm - latency to fall in min									Rotarod 30 rpm									Rotarod 40 rpm
CTRL	trial 1 (min)	trial 2 (min)	trial 3 (min)		trial 1 (# falls)	trial 2 (# falls)	trial 3 (# falls)		CTRL	trial 1	trial 2	trial 3		trial 1 (# falls)	trial 2 (# falls)	trial 3 (# falls)		CTRL	trial 1	trial 2	trial 3		trial 1 (# falls)	trial 2 (# falls)	trial 3 (# falls)
3662	5.57	8.02	10		0	0	0		3662	8.87	9.75	10		1	0	0		3662	6.15	10	10		1	0	0
3705	5.85	7.92	10		0	0	0		3705	10	8.47	10		0	0	0		3705	10	10	10		0	0	0
3713	10	6.98	10		0	0	0		3713	5.73	10	10		0	0	0		3713	9.35	10	7.32		1	0	0
3721	7.55	10	10		0	0	0		3721	8.12	10	10		1	0	0		3721	10	10	10		0	0	0
3724	6.05	4.9	8.87		0	3	0		3724	7	7.5	10		4	0	0		3724	7.55	10	10		0	0	0
3729	7.46	10	10		0	0	0		3729	10	10	10		0	0	0		3729	10	10	10		0	0	0
3742	10	10	10		0	0	0		3742	10	10	10		0	0	0		3742	10	10	10		0	0	0
3748	4.38	9.15	10		0	0	0		3748	5.22	6.75	7.03		15	9	3		3748	4.7	5.28	5.58		15	13	13
3751	5.53	10	10		0	0	0		3751	10	10	10		0	0	0		3751	9.97	10	10		0	0	0
3757	4.08	7.45	7.37		0	1	0		3757	7.8	10	10		0	0	0		3757	10	10	10		0	0	0
3767	7.75	10	10		0	0	0		3767	10	10	10		0	0	0		3767	9.43	10	10		0	0	0
3777	6.75	10	10		0	0	0		3777	7.31	10	10		1	0	0		3777	7.98	7.51	10		5	3	0
3803	6.93	10	9.38		0	0	0		3803	7.31	10	10		0	0	0		3803	9.73	7.3	7.65		0	5	3
3859	10	10	3.54		0	0	0		3859	10	10	10		0	0	0		3859	10	10	10		0	0	0
3870	10	10	6.14		0	0	0		3870	10	10	10		0	0	0		3870	8.34	10	10		0	0	0
3878	4.24	10	10		3	0	0		3878	10	10	10		0	0	0		3878	10	10	10		0	0	0
3880	5.05	3.22	6.05		12	3	2		3880	10	9.47	10		0	0	0		3880	8.56	10	10		0	0	0
3900	5.2	10	10		4	0	0		3900	10	10	10		0	0	0		3900	10	10	10		0	0	0
3901	5.31	6.4	10		0	0	0		3901	6.51	8.58	10		3	0	0		3901	7.29	6.42	8.19		0	0	0
3908	10	4.11	10		0	0	0		3908	10	10	10		0	0	0		3908	10	10	10		0	0	0
3909	2.56	10	5.07		4	0	1		3909	10	10	10		0	0	0		3909	6.45	7.41	7.18		1	1	0
3919	2.59	10	10		2	0	0		3919	10	10	10		0	0	0		3919	10	8.44	6.41		0	1	1
3925	10	10	10		0	0	0		3925	10	10	7.24		0	0	0		3925	8.21	8.06	8.3		1	2	0
3929	7.45	10	10		0	0	0		3929	10	10	10		0	0	0		3929	6.55	6.23	6.02		6	6	5
3931	0.2	4.42	8.11		10	0	7		3931	6.43	5.38	7.09		3	3	2		3931	5.07	5.38	2.58		8	8	10
3973	5.13	10	10		2	0	0		3973	10	10	10		0	0	0		3973	10	10	10		0	0	0
3975	3.02	8.59	10		5	1	0		3975	6.23	10	10		3	0	0		3975	5.14	7.5	2.22		1	4	6
3999	6.57	10	10		2	0	0		3999	10	10	10		0	0	0		3999	6.24	10	10		1	0	0
3006	10	10	10		0	0	0		3006	10	10	10		0	0	0		3006	10	10	10		0	0	0
3009	10	10	10		0	0	0		3009	10	10	10		0	0	0		3009	10	10	10		0	0	0
average	6.50733	8.70533	9.151		1.46667	0.266667	0.333333			8.88433	9.53	9.712		1.03333	0.4	0.166667			8.557	8.98433	8.715		1.33333	1.43333	1.26667
SEM	0.500091	0.388696	0.321754		0.553302	0.145755	0.24545			0.300616	0.207558	0.163269		0.533053	0.318289	0.120278			0.333064	0.293306	0.409658		0.599908	0.559606	0.589107
30
	Rotarod 20 rpm									Rotarod 30 rpm									Rotarod 40 rpm
HET	trial 1	trial 2	trial 3		trial 1 (# falls)	trial 2 (# falls)	trial 3 (# falls)		Het	trial 1	trial 2	trial 3		trial 1 (# falls)	trial 2 (# falls)	trial 3 (# falls)		Het	trial 1	trial 2	trial 3		trial 1 (# falls)	trial 2 (# falls)	trial 3 (# falls)
3667	3.38	5.03	5.43		0	2	1		3667	7.68	9.02	10		1	0	0		3667	7.58	10	7.13		3	0	1
3668	4.05	2.1	10		0	2	0		3668	5.06	6.87	8.03		6	1	0		3668	5.02	4.4	4.65		5	12	7
3669	5.33	4.1	10		0	2	0		3669	8.52	7.63	7.73		4	0	2		3669	7.95	10	10		0	0	0
3704	10	10	10		0	0	0		3704	10	10	10		0	0	0		3704	10	8.17	9		0	0	0
3709	4.43	4.53	10		0	8	0		3709	10	10	10		0	0	0		3709	10	10	10		0	0	0
3714	6.75	7.03	10		0	0	0		3714	6.18	7.4	10		6	1	0		3714	7.7	6.13	5.55		2	3	11
3711	7.75	10	10		0	0	0		3711	10	10	10		0	0	0		3711	10	10	10		0	0	0
3715	2.53	5.13	6.53		0	4	0		3715	7.55	7.42	9.53		5	1	0		3715	8.82	5.56	7.3		1	4	2
3728	8.55	8.15	10		0	0	0		3728	7.42	10	10		2	0	0		3728	10	9.27	10		0	0	0
3730	10	10	10		0	0	0		3730	10	10	10		0	0	0		3730	10	10	10		0	0	0
3735	9.62	5.6	10		0	0	0		3735	10	10	10		0	0	0		3735	7.63	10	8		2	0	0
3734	5.55	10	10		0	0	0		3734	8.27	10	10		0	0	0		3734	10	10	10		0	0	0
3740	0.5	10	10		0	0	0		3740	10	10	10		0	0	0		3740	8.17	10	10		3	0	0
3741	10	10	10		0	0	0		3741	10	10	10		0	0	0		3741	10	10	10		0	0	0
3749	10	10	10		0	0	0		3749	8.73	10	10		0	0	0		3749	10	10	10		0	0	0
3744	10	10	10		0	0	0		3744	10	10	10		0	0	0		3744	9.48	10	10		0	0	0
3747	7.15	4.97	9.8		0	2	0		3747	9.25	10	10		0	0	0		3747	10	10	10		0	0	0
3755	8.68	10	10		0	0	0		3755	10	9.5	10		0	0	0		3755	7.55	10	10		6	0	0
3761	8.35	8.18	10		0	3	0		3761	10	8.08	10		0	1	0		3761	10	10	10		0	0	0
3762	0.43	10	10		2	0	0		3762	10	10	10		0	0	0		3762	10	8.12	7.2		0	4	1
3776	10	10	10		0	0	0		3776	10	10	10		0	0	0		3776	9.07	10	10		1	0	0
3780	4.63	10	10		1	0	0		3780	10	10	10		0	0	0		3780	10	10	9.16		0	0	0
3783	10	10	10		0	0	0		3783	10	10	10		0	0	0		3783	7.83	10	10		0	0	0
3781	0.004	7.16	5.72		6	2	5		3781	4.01	3.88	1.43		10	9	8		3781	3.5	1.45	6.1		14	14	7
3782	8.98	10	10		0	0	0		3782	10	10	10		0	0	0		3782	10	10	10		0	0	0
3799	2.98	10	10		0	0	0		3799	6.35	10	7		4	0	5		3799	10	10	10		0	0	0
3802	7.11	4.81	10		0	1	0		3802	10	10	10		0	0	0		3802	10	10	8.04		0	0	0
3807	10	10	10		0	0	0		3807	10	10	10		0	0	0		3807	9.85	9.96	8.31		0	0	1
3809	3.47	5.19	5.39		23	9	2		3809	10	10	10		0	0	0		3809	9.51	8.58	8.19		0	0	1
3849	10	10	5.39		0	0	0		3849	10	10	10		0	0	0		3849	10	10	10		0	0	0
3871	6.12	8.15	10		0	0	0		3871	10	10	10		0	0	0		3871	10	10	10		0	0	0
3872	10	10	10		0	0	0		3872	10	10	10		0	0	0		3872	4.24	10	10		3	0	0
3898	10	10	10		0	0	0		3898	10	10	10		0	0	0		3898	8.1	8.48	9.58		2	1	0
3902	10	10	10		0	0	0		3902	10	10	10		0	0	0		3902	10	10	10		0	0	0
3912	5.4	10	10		0	0	0		3912	10	10	10		0	0	0		3912	10	10	7.52		0	0	0
3914	5.52	5.48	5.52		6	7	7		3914	6.49	8.32	10		1	0	0		3914	8.51	10	8.05		0	0	0
3915	4.09	6.43	6.1		6	2	0		3915	10	10	10		0	0	0		3915	7.53	7.53	7.35		2	1	0
average	6.79335	8.16324	9.18595		1.18919	1.18919	0.405405			9.06784	9.40865	9.56		1.05405	0.351351	0.405405			8.86595	9.12568	8.94946		1.18919	1.05405	0.837838
SEM	0.527621	0.398381	0.284026		0.674534	0.384575	0.237202			0.268984	0.217067	0.255399		0.386792	0.249123	0.258973			0.281078	0.315145	0.246892		0.43892	0.51362	0.393844
STATISTICS
Figure 5A (Rotarod) - Univariate Analysis of Variance - RM ANOVA 9(trials) x 2 (genotype)
Tests of Within-Subjects Effects
Measure:	MEASURE_1
Source		Type III Sum of Squares	df	Mean Square	F	Sig.	Partial Eta Squared	Noncent. Parameter	Observed Powera
trials	Sphericity Assumed	406.521	8	50.8151	22.8679	4.99759e-30	0.260253	182.943	1
	Greenhouse-Geisser	406.521	4.81691	84.3946	22.8679	4.91756e-19	0.260253	110.153	1
	Huynh-Feldt	406.521	5.32929	76.2806	22.8679	8.2935e-21	0.260253	121.87	1
	Lower-bound	406.521	1	406.521	22.8679	1.0339e-05	0.260253	22.8679	0.997023
trials * genotype	Sphericity Assumed	9.99442	8	1.2493	0.562214	0.809018	0.00857527	4.49771	0.262702
	Greenhouse-Geisser	9.99442	4.81691	2.07486	0.562214	0.722505	0.00857527	2.70813	0.202791
	Huynh-Feldt	9.99442	5.32929	1.87538	0.562214	0.739987	0.00857527	2.9962	0.212897
	Lower-bound	9.99442	1	9.99442	0.562214	0.456075	0.00857527	0.562214	0.114488
Error(trials)	Sphericity Assumed	1155.5	520	2.22211
	Greenhouse-Geisser	1155.5	313.099	3.69052
	Huynh-Feldt	1155.5	346.404	3.3357
	Lower-bound	1155.5	65	17.7769
Tests of Between-Subjects Effects
Measure:	MEASURE_1
Transformed Variable:	Average
Source	Type III Sum of Squares	df	Mean Square	F	Sig.	Partial Eta Squared	Noncent. Parameter	Observed Powera
Intercept	45876	1	45876	3203.36	5.03525e-57	0.980112	3203.36	1
genotype	0.257173	1	0.257173	0.0179575	0.893812	0.000276193	0.0179575	0.0519995
Error	930.879	65	14.3212
Open Field - Novelty-induced locomotion and center time - Figure 5B (Open field locomotion) and in Results Section (Center Time)
OPEN FIELD Novelty-induced locomotion																										CENTER OPEN FIELD Time (seconds)
CTRL														cHET												CTRL						cHET
Cage	Mouse ID	Genotype	Cohort	BM bin1	BM bin2	BM bin3	BM bin4	BM bin5	BM bin6	SUM BEFORE				Cage	Mouse ID	Genotype	Cohort	BM bin1	BM bin2	BM bin3	BM bin4	BM bin5	BM bin6	SUM BEFORE		Cage	Mouse ID	Genotype	Center time (during 60 min)			Cage	Mouse ID	Genotype	Center time (during 60 min)
9	3006	ctrl	1st cohort	818	188	118	250	93	6	1473				1	3667	chet	1st cohort	1103	812	569	448	423	173	3528		9	3006	ctrl	246.9			4	3046	chet	268.6
1	3662	ctrl	1st cohort	1186	1194	1583	1256	1482	1478	8179				7	3730	chet	1st cohort	1181	628	491	144	85	505	3034		10	3009	ctrl	970.5			7	3079	chet	77.8
3	3742	ctrl	1st cohort	1219	941	1234	1172	1460	1288	7314				10	3734	chet	1st cohort	732	509	564	653	514	393	3365		5	3049	ctrl	183.4			2	3089	chet	1124.5
8	3751	ctrl	1st cohort	883	275	534	212	77	1	1982				6	3735	chet	1st cohort	903	726	461	476	423	579	3568		3	3091	ctrl	323.2			5	3093	chet	1396
3	3767	ctrl	1st cohort	1053	493	81	127	398	6	2158				9	3755	chet	1st cohort	1230	250	535	172	296	70	2553		4	3092	ctrl	34			1	3667	chet	223.8
6	3777	ctrl	1st cohort	518	82	113	81	65	30	889				4	3781	chet	1st cohort	1058	717	622	999	252	339	3987		1	3662	ctrl	279.2			2	3668	chet	807.1
9	3880	ctrl	1st cohort	774	504	194	218	45	80	1815				5	3849	chet	1st cohort	1241	931	1049	1055	875	881	6032		2	3705	ctrl	645.9			3	3669	chet	561.8
8	3919	ctrl	1st cohort	1080	706	103	23	111	35	2058				8	3872	chet	1st cohort	1358	884	689	524	58	18	3531		7	3713	ctrl	1451.8			4	3704	chet	43
10	3929	ctrl	1st cohort	1368	757	544	139	86	178	3072				2	3902	chet	1st cohort	1659	1013	996	807	757	689	5921		4	3721	ctrl	118.1			5	3709	chet	1511.6
1	3931	ctrl	1st cohort	894	460	325	534	133	96	2442				6	3914	chet	1st cohort	1330	1086	561	532	67	538	4114		6	3724	ctrl	604.1			1	3711	chet	446.8
3	3091	ctrl	1st cohort	909	457	39	70	170	357	2002				2	3089	chet	1st cohort	1239	532	318	211	60	180	2540		9	3729	ctrl	276.4			8	3714	chet	113.9
10	3009	ctrl	1st cohort	1206	903	797	640	434	421	4401				2	3668	chet	1st cohort	1182	630	475	558	319	956	4120		3	3742	ctrl	357.4			4	3728	chet	605.1
2	3705	ctrl	1st cohort	842	652	205	518	373	491	3081				4	3704	chet	1st cohort	997	906	829	638	490	287	4147		7	3748	ctrl	22.6			7	3730	chet	382.5
9	3729	ctrl	1st cohort	1028	644	756	969	784	666	4847				1	3711	chet	1st cohort	1120	499	391	383	89	51	2533		8	3751	ctrl	36.3			10	3734	chet	134.1
7	3748	ctrl	1st cohort	638	198	152	138	90	57	1273				4	3728	chet	1st cohort	594	819	355	378	500	77	2723		1	3757	ctrl	19.5			6	3735	chet	436.9
1	3757	ctrl	1st cohort	734	255	164	52	75	69	1349				1	3740	chet	1st cohort	858	243	266	164	36	0	1567		3	3767	ctrl	106.2			1	3740	chet	87.5
9	3803	ctrl	1st cohort	712	225	15	78	18	26	1074				2	3741	chet	1st cohort	1700	1741	1611	1022	1825	1161	9060		6	3777	ctrl	0			2	3741	chet	174.4
10	3870	ctrl	1st cohort	1224	683	692	348	49	5	3001				5	3744	chet	1st cohort	1217	604	793	295	750	167	3826		9	3803	ctrl	0			5	3744	chet	209.9
3	3908	ctrl	1st cohort	992	828	446	68	91	187	2612				2	3761	chet	1st cohort	758	77	116	200	119	12	1282		9	3859	ctrl	1083.2			8	3749	chet	173.5
4	3909	ctrl	1st cohort	541	259	117	50	21	12	1000				5	3782	chet	1st cohort	1327	1193	906	1155	851	1377	6809		10	3870	ctrl	302.2			9	3755	chet	20.8
9	3925	ctrl	1st cohort	592	73	697	35	8	156	1561				2	3783	chet	1st cohort	1177	1035	953	892	857	699	5613		5	3878	ctrl	148.2			2	3761	chet	4.1
4	3975	ctrl	1st cohort	867	499	77	15	6	104	1568				9	3802	chet	1st cohort	981	718	829	838	432	614	4412		9	3880	ctrl	213.3			1	3762	chet	86.2
7	3999	ctrl	1st cohort	882	791	1051	817	356	671	4568				10	3898	chet	1st cohort	930	344	230	778	74	26	2382		6	3900	ctrl	85			2	3776	chet	240.1
5	3049	ctrl	1st cohort	1072	857	840	387	899	279	4334				5	3912	chet	1st cohort	988	332	137	13	0	0	1470		7	3901	ctrl	122.3			4	3781	chet	275.7
4	3092	ctrl	1st cohort	765	366	400	80	61	1	1673				7	3915	chet	1st cohort	898	563	290	114	25	8	1898		3	3908	ctrl	850.5			5	3782	chet	297.5
7	3713	ctrl	1st cohort	819	382	143	113	14	3	1474				4	3046	chet	1st cohort	1433	763	903	637	1137	267	5140		4	3909	ctrl	33.1			2	3783	chet	83.1
4	3721	ctrl	1st cohort	1436	703	406	245	390	1337	4517				7	3079	chet	1st cohort	1238	564	115	453	116	1	2487		8	3919	ctrl	71.5			9	3802	chet	294
6	3724	ctrl	1st cohort	1120	345	165	229	225	97	2181				5	3093	chet	1st cohort	1062	593	441	401	410	122	3029		9	3925	ctrl	24			1	3807	chet	474.2
9	3859	ctrl	1st cohort	1165	373	644	403	465	376	3426				3	3669	chet	1st cohort	1699	1114	1341	1314	1038	925	7431		10	3929	ctrl	86.5			2	3809	chet	68.1
5	3878	ctrl	1st cohort	1765	1617	1368	1466	883	808	7907				5	3709	chet	1st cohort	1071	380	330	65	49	176	2071		1	3931	ctrl	97.5			5	3849	chet	218.2
6	3900	ctrl	1st cohort	941	678	609	219	329	101	2877				8	3714	chet	1st cohort	1268	771	458	470	304	840	4111		8	3973	ctrl	323.2			8	3872	chet	511.7
7	3901	ctrl	1st cohort	627	304	52	45	168	7	1203				8	3749	chet	1st cohort	1105	462	390	489	523	365	3334		4	3975	ctrl	23.2			10	3898	chet	385.6
8	3973	ctrl	1st cohort	1047	521	383	24	209	93	2277				1	3762	chet	1st cohort	1042	751	726	847	60	544	3970		7	3999	ctrl	165.2			2	3902	chet	605.3
1	3553	ctrl	2nd cohort	1678	1097	806	705	886	545	5717				2	3776	chet	1st cohort	628	379	359	496	25	34	1921		1	3553	ctrl	85.2			5	3912	chet	104.5
9	3575	ctrl	2nd cohort	2237	1461	1019	1010	524	57	6308				1	3807	chet	1st cohort	545	271	296	44	412	55	1623		3	3565	ctrl	403.1			6	3914	chet	190.8
8	3628	ctrl	2nd cohort	1724	1178	801	485	124	163	4475				2	3809	chet	1st cohort	823	701	251	43	423	3	2244		9	3575	ctrl	439.4			7	3915	chet	492.6
4	3654	ctrl	2nd cohort	1954	1255	865	650	107	132	4963				1	3560	chet	2nd cohort	1379	1076	779	715	377	143	4469		4	3585	ctrl	120.2			2	3554	chet	408.9
3	3565	ctrl	2nd cohort	1560	1221	1295	1002	1495	1431	8004				5	3559	chet	2nd cohort	1752	1214	1163	889	634	153	5805		2	3597	ctrl	73.8			5	3559	chet	262.7
10	3689	ctrl	2nd cohort	2001	1579	1836	1162	1113	1219	8910				8	3578	chet	2nd cohort	1695	1223	1246	679	533	228	5604		5	3623	ctrl	313.5			1	3560	chet	119.5
5	3720	ctrl	2nd cohort	2189	889	1684	1098	233	51	6144				3	3598	chet	2nd cohort	1873	1208	869	1191	446	35	5622		8	3628	ctrl	26.8			6	3569	chet	307.9
8	3736	ctrl	2nd cohort	1466	1286	1285	1565	1280	1584	8466				3	3650	chet	2nd cohort	1415	1424	1039	968	1317	1428	7591		4	3654	ctrl	83.5			8	3578	chet	60.6
4	3585	ctrl	2nd cohort	1914	1572	1195	922	485	133	6221				8	3652	chet	2nd cohort	1771	1331	1368	1119	1225	463	7277		1	3656	ctrl	106.6			10	3582	chet	126
2	3597	ctrl	2nd cohort	1370	970	691	639	214	9	3893				5	3728	chet	2nd cohort	1639	1014	902	780	720	133	5188		10	3688	ctrl	192.5			1	3596	chet	57.8
5	3623	ctrl	2nd cohort	2164	1213	1561	827	803	279	6847				6	3569	chet	2nd cohort	1862	1537	1175	839	674	471	6558		5	3720	ctrl	182.2			3	3598	chet	165.6
10	3688	ctrl	2nd cohort	2087	1290	1008	719	395	452	5951				2	3554	chet	2nd cohort	2168	1619	1606	1233	1350	960	8936		9	3729	ctrl	220.1			4	3600	chet	7.8
1	3656	ctrl	2nd cohort	1783	1191	330	41	34	20	3399				10	3582	chet	2nd cohort	1556	1049	695	779	430	314	4823		6	3730	ctrl	256.098			7	3626	chet	217.5
9	3729	ctrl	2nd cohort	1354	888	686	520	323	184	3955				1	3596	chet	2nd cohort	1547	1013	1124	911	678	169	5442		7	3736	ctrl	61.2			1	3638	chet	149
9	3743	ctrl	2nd cohort	1885	1294	1206	1089	698	256	6428				4	3600	chet	2nd cohort	1391	738	565	183	31	171	3079		9	3743	ctrl	284.1			6	3649	chet	50.5
10	3746	ctrl	2nd cohort	2504	1614	1412	1019	465	286	7300				7	3626	chet	2nd cohort	1647	1201	1056	717	682	530	5833		10	3746	ctrl	248.1			3	3650	chet	440.2
4	4701	ctrl	2nd cohort	1853	1579	1050	1114	441	189	6226				1	3638	chet	2nd cohort	1888	1676	1089	1100	880	723	7356		4	4701	ctrl	404.1			7	3651	chet	172.8
		CTRL	AVG	1268.8	795.8	675.54	511.76	393.76	330.24	3975.9				6	3649	chet	2nd cohort	1751	1154	755	428	100	15	4203			CTRL	AVG	256.098			8	3652	chet	267.4
		50	SEM	74.2076	64.9326	72.3074	63.9195	59.3042	63.0787	337.094				7	3651	chet	2nd cohort	1787	907	1248	631	635	418	5626			50	SEM	42.2675			4	3661	chet	125.1
														4	3661	chet	2nd cohort	1806	941	761	326	94	10	3938								8	3726	chet	127.5
														8	3726	chet	2nd cohort	1541	1074	608	570	504	170	4467								5	3728	chet	33.9
																het	AVG	1298.94	850.741	716.556	606.778	481.185	364.185	4318.39									het	AVG	300.593
																54	SEM	52.2113	52.882	52.1198	47.6692	55.5842	50.7549	263.283									54	SEM	43.1315
STATISTICS
Figure 5B (Open Field) - Univariate Analysis of Variance - Total locomotion RM ANOVA 6 (bins of 10 min) x 2 (genotype); Center time One-way ANOVA, genotype effect
Total Locomotion												Center time
Tests of Within-Subjects Effects												Tests of Between-Subjects Effects
Measure:	MEASURE_1											Dependent Variable:	SumCenterTime
Source		Type III Sum of Squares	df	Mean Square	F	Sig.	Partial Eta Squared	Noncent. Parameter	Observed Powera			Source	Type III Sum of Squares	df	Mean Square	F	Sig.	Partial Eta Squared	Noncent. Parameter	Observed Powerb
bins	Sphericity Assumed	5.90716e+07	5	1.18143e+07	192.979	4.07797e-115	0.654213	964.897	1			Corrected Model	51402.464a	1	51402.5	0.551022	0.459606	0.00537315	0.551022	0.113875
	Greenhouse-Geisser	5.90716e+07	2.61228	2.2613e+07	192.979	1.58376e-61	0.654213	504.117	1			Intercept	8.04554e+06	1	8.04554e+06	86.2462	3.08198e-15	0.458156	86.2462	1
	Huynh-Feldt	5.90716e+07	2.71339	2.17704e+07	192.979	8.48615e-64	0.654213	523.628	1			genotype	51402.5	1	51402.5	0.551022	0.459606	0.00537315	0.551022	0.113875
	Lower-bound	5.90716e+07	1	5.90716e+07	192.979	2.92259e-25	0.654213	192.979	1			Error	9.51514e+06	102	93285.7
bins * genotype	Sphericity Assumed	100821	5	20164.3	0.329371	0.895257	0.00321873	1.64686	0.13437			Total	1.76736e+07	104
	Greenhouse-Geisser	100821	2.61228	38595.1	0.329371	0.776163	0.00321873	0.86041	0.10952			Corrected Total	9.56654e+06	103
	Huynh-Feldt	100821	2.71339	37157	0.329371	0.783939	0.00321873	0.893712	0.110683
	Lower-bound	100821	1	100821	0.329371	0.567293	0.00321873	0.329371	0.0877735
Error(bins)	Sphericity Assumed	3.12225e+07	510	61220.6
	Greenhouse-Geisser	3.12225e+07	266.453	117178
	Huynh-Feldt	3.12225e+07	276.766	112812
	Lower-bound	3.12225e+07	102	306103
Tests of Between-Subjects Effects
Measure:	MEASURE_1
Transformed Variable:	Average
Source	Type III Sum of Squares	df	Mean Square	F	Sig.	Partial Eta Squared	Noncent. Parameter	Observed Powera
Intercept	2.97672e+08	1	2.97672e+08	389.64	1.28994e-36	0.792531	389.64	1
genotype	507542	1	507542	0.664352	0.416927	0.00647111	0.664352	0.127375
Error	7.79245e+07	102	763965
Elevated Plus Maze - Mention in Result Section (EPM short arms) and in Figure 5C (EPM long arms)
EPM short arms													EPM long arms
CTRL						HET							Mouse ID	genotype	Open arms Proximal time	Open arms Distal time	Time Open Arms	Time Open arms (Perc of 360 sec)	time per entries
Group	Zones	Mouse ID	Genotype	Duration(Second)		Group	Zones	Mouse ID	Genotype	Duration(Second)			3742	control	68.1	54.4	122.5	34.0278	6.80556
M1	Open	3662	CTRL	2.6		M1	Open	3667	HET	40.83			3777	control	65	96.8	161.8	44.9444	5.05625
M1	Open	3705	CTRL	24.67		M1	Open	3668	HET	8.57			3784	control	51.7	82	133.7	37.1389	3.82
M2	Open	3713	CTRL	36.47		M1	Open	3669	HET	86.1			3837	control	44.5	18.1	62.6	17.3889	7.825
M3	Open	3721	CTRL	27.67		M2	Open	3704	HET	24			3838	control	41.5	32.8	74.3	20.6389	3.715
M5	Open	3724	CTRL	17.47		M2	Open	3709	HET	6.17			3840	control	34	34.8	68.8	19.1111	3.82222
M5	Open	3729	CTRL	5.73		M3	Open	3711	HET	19.93			3914	control	28.2	14.7	42.9	11.9167	8.58
M6	Open	3742	CTRL	13.47		M2	Open	3714	HET	30.7			3915	control	35.3	32.9	68.2	18.9444	5.68333
M7	Open	3748	CTRL	37.17		M3	Open	3715	HET	31.7			3926	control	62.3	25.3	87.6	24.3333	4.86667
M7	Open	3751	CTRL	67.1		M4	Open	3728	HET	45.2			3930	control	43.8	45.1	88.9	24.6944	5.55625
M8	Open	3757	CTRL	19.93		M5	Open	3730	HET	33.07				AVG	47.44	43.69	91.13	25.3139	5.57303
M9	Open	3767	CTRL	45.97		M5	Open	3734	HET	4.23				SEM	4.38371	8.53264	11.6694	3.2415	0.5375
M10	Open	3777	CTRL	25.17		M4	Open	3735	HET	44.03
M13	Open	3803	CTRL	6.53		M6	Open	3740	HET	38.27			3715	het	46.1	78.2	124.3	34.5278	6.54211
M14	Open	3859	CTRL	8.97		M6	Open	3741	HET	43.93			3756	het	35.5	21.2	56.7	15.75	8.1
M15	Open	3870	CTRL	69.53		M7	Open	3744	HET	54.33			3771	het	19.7	0	19.7	5.47222	1.51538
M1	Open	3006	CTRL	47.37		M7	Open	3747	HET	30.9			3772	het	51.9	44.8	96.7	26.8611	6.44667
M1	Open	3009	CTRL	36.63		M6	Open	3749	HET	0			3776	het	56.1	80.5	136.6	37.9444	5.464
M2	Open	3908	CTRL	55.3		M8	Open	3755	HET	13.53			3781	het	70.7	39.3	110	30.5556	3.7931
M3	Open	3909	CTRL	8.03		M8	Open	3761	HET	11.83			3783	het	45	66.4	111.4	30.9444	6.9625
M5	Open	3919	CTRL	49.93		M1	Open	3912	HET	47.57			3830	het	17.4	10.6	28	7.77778	5.6
M5	Open	3925	CTRL	15.23		M1	Open	3914	HET	1.37			3843	het	51.6	78.6	130.2	36.1667	6.51
M6	Open	3929	CTRL	55.97		M1	Open	3762	HET	17.53			3845	het	60	50.4	110.4	30.6667	6.13333
M7	Open	3931	CTRL	63.43		M2	Open	3776	HET	8.33			3879	het	19.2	46.1	65.3	18.1389	5.44167
M7	Open	3973	CTRL	48.73		M2	Open	3780	HET	46.13			3881	het	35.4	87.5	122.9	34.1389	8.19333
M8	Open	3975	CTRL	34.57		M3	Open	3781	HET	16.7			3883	het	10.5	24.6	35.1	9.75	8.775
M9	Open	3999	CTRL	35.47		M2	Open	3782	HET	7.33			3886	het	54	89.6	143.6	39.8889	6.24348
M10	Open	3878	CTRL	29.37		M3	Open	3783	HET	0				AVG	40.9357	51.2714	92.2071	25.6131	6.1229
M13	Open	3880	CTRL	30.67		M4	Open	3797	HET	16.1				SEM	4.91184	7.93104	11.4088	3.16912	0.49285
M14	Open	3900	CTRL	1.1		M5	Open	3799	HET	1.9
M15	Open	3901	CTRL	2.37		M5	Open	3802	HET	19.43
		AVG		30.754		M4	Open	3807	HET	60.37
	30	SEM		3.78822		M6	Open	3809	HET	5.67
						M6	Open	3849	HET	2.7
						M7	Open	3871	HET	21.1
						M7	Open	3872	HET	40.23
						M6	Open	3898	HET	59.5
						M8	Open	3902	HET	0
								AVG		25.3859
							37	SEM		3.51533
STATISTICS
Figure 5C (Elevated Plus Maze) - Univariate Analysis of Variance - one-way ANOVA, genotype effect
EPM short arms , time in open arms
Tests of Between-Subjects Effects
Dependent Variable:	totaltime
Source	Type III Sum of Squares	df	Mean Square	F	Sig.	Partial Eta Squared	Noncent. Parameter	Observed Powerb
Corrected Model	477.399a	1	477.399	1.10492	0.297081	0.0167147	1.10492	0.179036
Intercept	52214.6	1	52214.6	120.849	1.80238e-16	0.650253	120.849	1
genotype	477.399	1	477.399	1.10492	0.297081	0.0167147	1.10492	0.179036
Error	28084.3	65	432.066
Total	80303.1	67
Corrected Total	28561.7	66
EPM long arms, percentage time in open arms											EPM long arms, time per entries open arms											EPM long arms, proximal open arms											EPM long arms, distal open arms
Tests of Between-Subjects Effects											Tests of Between-Subjects Effects											Tests of Between-Subjects Effects											Tests of Between-Subjects Effects
Dependent Variable:	totalPerc										Dependent Variable:	timeperentries										Dependent Variable:	totaltimeProx										Dependent Variable:	totaltimeDistal
Source	Type III Sum of Squares	df	Mean Square	F	Sig.	Partial Eta Squared	Noncent. Parameter	Observed Powerb			Source	Type III Sum of Squares	df	Mean Square	F	Sig.	Partial Eta Squared	Noncent. Parameter	Observed Powerb			Source	Type III Sum of Squares	df	Mean Square	F	Sig.	Partial Eta Squared	Noncent. Parameter	Observed Powerb			Source	Type III Sum of Squares	df	Mean Square	F	Sig.	Partial Eta Squared	Noncent. Parameter	Observed Powerb
Corrected Model	.527a	1	0.527002	0.00418034	0.949032	0.000189979	0.00418034	0.0504388			Corrected Model	1.746a	1	1.7463	0.547191	0.467288	0.0242687	0.547191	0.109087			Corrected Model	246.783a	1	246.783	0.887058	0.356504	0.0387581	0.887058	0.146964			Corrected Model	335.289a	1	335.289	0.409784	0.52869	0.0182859	0.409784	0.0939811
Intercept	15128.8	1	15128.8	120.007	2.24047e-10	0.845078	120.007	1			Intercept	798.135	1	798.135	250.09	1.68783e-13	0.919145	250.09	1			Intercept	45559.9	1	45559.9	163.764	1.14508e-11	0.88157	163.764	1			Intercept	52603.1	1	52603.1	64.2906	5.68527e-08	0.745048	64.2906	1
genotype	0.527002	1	0.527002	0.00418034	0.949032	0.000189979	0.00418034	0.0504388			genotype	1.7463	1	1.7463	0.547191	0.467288	0.0242687	0.547191	0.109087			genotype	246.783	1	246.783	0.887058	0.356504	0.0387581	0.887058	0.146964			genotype	335.289	1	335.289	0.409784	0.52869	0.0182859	0.409784	0.0939811
Error	2773.47	22	126.067								Error	70.2105	22	3.19139								Error	6120.5	22	278.204								Error	18000.6	22	818.208
Total	18365.7	24									Total	905.746	24									Total	52086.3	24									Total	73891.4	24
Corrected Total	2773.99	23									Corrected Total	71.9568	23									Corrected Total	6367.28	23									Corrected Total	18335.9	23
Fear Conditioning - Figure 5D
Tone Freezing						Context Freezing
% freeze						% freeze
Onset		120	200			Onset		0
Duration		20	20			Duration		240
MouseID	genotype	CS1	CS2	Average CS1 and CS2		MouseID	Genotype	Freezing
m3495b3	ctrl	66.67	28	47.335		m3509b3	ctrl	18.71
m3496b4	ctrl	70.67	74.67	72.67		m3495b3	ctrl	18.93
m3508b4	ctrl	93.33	68	80.665		m3496b4	ctrl	32.07
m3509b3	ctrl	69.33	68	68.665		m3562b3	ctrl	44.15
m3510b1	ctrl	24	49.33	36.665		m3576b3	ctrl	33.85
m3562b4	ctrl	60	80	70		m3508b4	ctrl	32.55
m3576b3	ctrl	86.67	64	75.335		m3510b1	ctrl	22.83
	AVG	67.2386	61.7143	64.4764			AVG	29.0129
	SEM	8.44701	6.68418	6.09932			SEM	3.52011
MouseID	genotype	CS1	CS2	Average CS1 and CS2		MouseID	Genotype	Freezing
m3454b1	het	94.67	94.67	94.67		m3454b1	het	41.09
m3455b3	het	90.67	13.33	52		m3455b3	het	42.43
m3492b3	het	37.33	37.33	37.33		m3505b1	het	56.68
m3494b1	het	96	92	94		m3511b4	het	0.67
m3505b1	het	64	90.67	77.335		m3492b3	het	9.35
m3507b3	het	9.33	28	18.665		m3494b1	het	16.15
m3511b4	het	36	4	20		m3559b2	het	13.04
m3512b3	het	60	14.67	37.335		m3575b1	het	8.57
m3559b3	het	32	30.67	31.335		m3582b1	het	57.86
m3575b1	het	42.67	28	35.335		m3507b3	het	20.4
m3582b1	het	57.33	88	72.665		m3512b3	het	11.47
	AVG	56.3636	47.3945	51.8791			AVG	25.2464
	SEM	8.55891	10.8686	8.48728			SEM	6.16281
STATISTICS
Figure 5D (Fear Conditioning) - Univariate Analysis of Variance - one-way ANOVA, genotype effect for the Tone and Context
Tone														Context
Tests of Between-Subjects Effects														Tests of Between-Subjects Effects
Dependent Variable:	TONEfreez													Dependent Variable:	CONTfreez
Source	Type III Sum of Squares	df	Mean Square	F	Sig.	Partial Eta Squared	Noncent. Parameter	Observed Powerb						Source	Type III Sum of Squares	df	Mean Square	F	Sig.	Partial Eta Squared	Noncent. Parameter	Observed Powerb
Corrected Model	678.853a	1	678.853	1.14499	0.300477	0.066783	1.14499	0.171745						Corrected Model	60.687a	1	60.6866	0.206669	0.655498	0.0127521	0.206669	0.0712318
Intercept	57915.2	1	57915.2	97.6832	3.23259e-08	0.859258	97.6832	1			partial eta square	power		Intercept	12594	1	12594	42.8893	6.69874e-06	0.728304	42.8893	0.999984			partial eta square	power
genotype	678.853	1	678.853	1.14499	0.300477	0.066783	1.14499	0.171745		genotype	0.066783	0.171745		genotype	60.6866	1	60.6866	0.206669	0.655498	0.0127521	0.206669	0.0712318		genotype	0.0127521	0.0712318
Error	9486.2	16	592.888											Error	4698.26	16	293.641
Total	68192.5	18												Total	17601.6	18
Corrected Total	10165.1	17												Corrected Total	4758.94	17
Amphetamine - Dose Response Curve - Figure 5E
VEHICLE						2.5 mg/kg						5 mg/kg
Cage	Mouse ID	Genotype	Drug treatment	After injection (90 min loc counts)		Cage	Mouse ID	Genotype	Drug treatment	SUM before		Cage	Mouse ID	Genotype	Drug treatment	SUM before
9	3006	wt	0	1425		10	3009	wt	2.5	3795		7	3713	wt	5	38840
1	3662	wt	0	1310		2	3705	wt	2.5	2397		4	3721	wt	5	28477
3	3742	wt	0	1088		9	3729	wt	2.5	24607		6	3724	wt	5	16919
8	3751	wt	0	461		7	3748	wt	2.5	1416		9	3859	wt	5	15432
3	3767	wt	0	606		1	3757	wt	2.5	18433		5	3878	wt	5	31413
6	3777	wt	0	735		9	3803	wt	2.5	16503		6	3900	wt	5	12411
9	3880	wt	0	1005		10	3870	wt	2.5	11693		7	3901	wt	5	10315
8	3919	wt	0	777		3	3908	wt	2.5	2733		8	3973	wt	5	6782
10	3929	wt	0	1011		4	3909	wt	2.5	7387					AVG	20073.6
1	3931	wt	0	1000		9	3925	wt	2.5	971			n=	8	SEM	4038.84
3	3091	wt	0	542		4	3975	wt	2.5	2290
			AVG	905.455		7	3999	wt	2.5	7119		3	3669	het	5	23800
	n=	11	SEM	93.5056		5	3049	wt	2.5	2602		5	3709	het	5	10786
						4	3092	wt	2.5	775		8	3714	het	5	18573
1	3667	het	0	758					AVG	7337.21		8	3749	het	5	10364
7	3730	het	0	754			n=	14	SEM	2028.77		1	3762	het	5	23044
10	3734	het	0	2771								2	3776	het	5	12822
6	3735	het	0	1338		2	3668	het	2.5	14263		3	3780	het	5	33638
6	3747	het	0	1125		4	3704	het	2.5	31139		1	3807	het	5	7917
9	3755	het	0	312		1	3711	het	2.5	7560		2	3809	het	5	18622
4	3781	het	0	1225		4	3728	het	2.5	8895		4	3871	het	5	22403
5	3849	het	0	896		1	3740	het	2.5	2279					AVG	18196.9
8	3872	het	0	1204		2	3741	het	2.5	3728			n=	10	SEM	2499.27
2	3902	het	0	882		5	3744	het	2.5	7933
6	3914	het	0	1367		2	3761	het	2.5	6221
2	3089	het	0	6453		5	3782	het	2.5	13522
			AVG	1590.42		2	3783	het	2.5	3771
	n=	12	SEM	474.042		9	3802	het	2.5	6896
						10	3898	het	2.5	2511
						5	3912	het	2.5	1206
						7	3915	het	2.5	1490
						4	3046	het	2.5	4495
						7	3079	het	2.5	3798
						5	3093	het	2.5	3205
									AVG	7230.12
							n=	17	SEM	1758.28
STATISTICS
Figure 5E (Acute Amphetamine) - Univariate Analysis of Variance - ANOVA 3 (dose) x 2 (genotype)
Tests of Between-Subjects Effects
Dependent Variable:	sumafter
Source	Type III Sum of Squares	df	Mean Square	F	Sig.	Partial Eta Squared	Noncent. Parameter	Observed Powerb
Corrected Model	3262561259.237a	5	6.52512e+08	13.9089	2.8048e-09	0.513075	69.5444	1
Intercept	5.78254e+09	1	5.78254e+09	123.26	9.60061e-17	0.651273	123.26	1
genotype	3.18613e+06	1	3.18613e+06	0.0679151	0.795208	0.00102796	0.0679151	0.0575904
drugtreat	3.26055e+09	2	1.63027e+09	34.7507	4.90683e-11	0.51292	69.5014	1
genotype * drugtreat	1.69018e+07	2	8.45089e+06	0.180138	0.835564	0.0054291	0.360277	0.076835
Error	3.09628e+09	66	4.69134e+07
Total	11312882320	72
Corrected Total	6.35884e+09	71
