# Supplementary material for: Dopamine neuron dependent behaviors mediated by glutamate cotransmission
Source: eLife. 2017 Jul 13;6:e27566. doi: 10.7554/eLife.27566 (PMC5599237; doi:10.7554/eLife.27566)
Supplement: Figure 6—figure supplement 1—source data 1. — DOI: http://dx.doi.org/10.7554/eLife.27566.025 [file elife-27566-fig6-figsupp1-data1.xlsx]

## Sheet: Figure 6 - Supp 1
stopGLS1 HET Amphetamine Sensitization
DAY1					DAY2					DAY3					DAY4					DAY11 - Challenge
mouse ID	genotype	treatment	SUM after		mouse ID	genotype	treatment	SUM after		mouse ID	genotype	treatment	SUM after		mouse ID	genotype	treatment	SUM after		mouse ID	genotype	treatment	SUM after
1324	wt	saline	1043.62		1324	wt	saline	583.091		1324	wt	saline	1269.01		1324	wt	saline	7249.91		1324	wt	saline	11008.9
1346	wt	saline	3651.99		1346	wt	saline	10128.3		1346	wt	saline	14007.5		1346	wt	saline	24097.6		1346	wt	saline	46275.4
1350	wt	saline	414.459		1350	wt	saline	633.639		1350	wt	saline	529.971		1350	wt	saline	650.094		1350	wt	saline	5706.72
1355	wt	saline	709.629		1355	wt	saline	456.539		1355	wt	saline	423.913		1355	wt	saline	813.729		1355	wt	saline	14962.5
1361	wt	saline	209.084		1361	wt	saline	7101.46		1361	wt	saline	4224.12		1361	wt	saline	2343.95		1361	wt	saline	39042.6
1377	wt	saline	947.441		1377	wt	saline	468.981		1377	wt	saline	529.094		1377	wt	saline	734.197		1377	wt	saline	3209.44
1379	wt	saline	10244		1379	wt	saline	6885.32		1379	wt	saline	12062.2		1379	wt	saline	16717.8		1379	wt	saline	31974.7
1384	wt	saline	5186.72		1384	wt	saline	13536.4		1384	wt	saline	6329.66		1384	wt	saline	24885.7		1384	wt	saline	12592
1386	wt	saline	1082.91		1386	wt	saline	1221.92		1386	wt	saline	155.631		1386	wt	saline	2563.98		1386	wt	saline	4198.96
1388	wt	saline	526.101		1388	wt	saline	139.264		1388	wt	saline	1965.75		1388	wt	saline	4550.56		1388	wt	saline	45593.9
		AVG	2401.59				AVG	4115.49				AVG	4149.69				AVG	8460.75				AVG	21456.5
		SEM	1063.75				SEM	1636.63				SEM	1698.42				SEM	3240.55				SEM	5802.55
1328	het	saline	261.072		1328	het	saline	504.105		1328	het	saline	661.008		1328	het	saline	2011.88		1328	het	saline	13514.9
1339	het	saline	363.879		1339	het	saline	11390.6		1339	het	saline	10423.6		1339	het	saline	19357.9		1339	het	saline	29511.3
1341	het	saline	1020.98		1341	het	saline	1569.2		1341	het	saline	1576.16		1341	het	saline	3465.64		1341	het	saline	36064.3
1344	het	saline	377.754		1344	het	saline	345.576		1344	het	saline	147.523		1344	het	saline	324.304		1344	het	saline	12867.8
1348	het	saline	223.641		1348	het	saline	125.57		1348	het	saline	214.094		1348	het	saline	136.406		1348	het	saline	6158.21
1352	het	saline	702.125		1352	het	saline	434.025		1352	het	saline	4640.51		1352	het	saline	1295.11		1352	het	saline	18509.4
1356	het	saline	820.221		1356	het	saline	1425.42		1356	het	saline	6149.16		1356	het	saline	739.608		1356	het	saline	34133
1364	het	saline	756.631		1364	het	saline	293.415		1364	het	saline	417.834		1364	het	saline	637.497		1364	het	saline	4952.18
1381	het	saline	1261.46		1381	het	saline	2963.15		1381	het	saline	1883.42		1381	het	saline	770.898		1381	het	saline	7828.03
1383	het	saline	780.557		1383	het	saline	2595.59		1383	het	saline	6063.01		1383	het	saline	12445.4		1383	het	saline	3652.89
1387	het	saline	127.476		1387	het	saline	259.228		1387	het	saline	320.752		1387	het	saline	604.767		1387	het	saline	3612.93
1391	het	saline	3397.2		1391	het	saline	1797.4		1391	het	saline	1247.62		1391	het	saline	1185.42		1391	het	saline	23737.1
		AVG	841.084				AVG	1975.27				AVG	2812.06				AVG	3581.24				AVG	16211.8
		SEM	264.148				SEM	939.922				SEM	988.513				SEM	1811.1				SEM	3621.71
1337	wt	drug	62537.3		1337	wt	drug	44655.8		1337	wt	drug	50504.2		1337	wt	drug	43058.9		1337	wt	drug	46004.4
1343	wt	drug	103978		1343	wt	drug	101461		1343	wt	drug	125763		1343	wt	drug	133009		1343	wt	drug	66752.9
1349	wt	drug	66342.3		1349	wt	drug	73790.7		1349	wt	drug	66125.7		1349	wt	drug	61334		1349	wt	drug	39091.1
1354	wt	drug	100010		1354	wt	drug	81987		1354	wt	drug	114931		1354	wt	drug	112993		1354	wt	drug	78676.5
1357	wt	drug	110853		1357	wt	drug	120608		1357	wt	drug	131944		1357	wt	drug	146691		1357	wt	drug	88063.2
1359	wt	drug	17479.3		1359	wt	drug	16445.9		1359	wt	drug	90906.9		1359	wt	drug	92022.7		1359	wt	drug	53800.8
1360	wt	drug	81647.8		1360	wt	drug	84582.6		1360	wt	drug	80427.5		1360	wt	drug	70180.6		1360	wt	drug	47841
1375	wt	drug	59808.7		1375	wt	drug	33400.2		1375	wt	drug	15543.9		1375	wt	drug	71409.8		1375	wt	drug	84820.7
1380	wt	drug	66415.5		1380	wt	drug	48492.6		1380	wt	drug	61705.2		1380	wt	drug	78963		1380	wt	drug	98889.8
1385	wt	drug	5893.52		1385	wt	drug	23296		1385	wt	drug	43032		1385	wt	drug	66892.7		1385	wt	drug	64509.8
1389	wt	drug	17404.9		1389	wt	drug	9638.1		1389	wt	drug	5588.02		1389	wt	drug	10122.9		1389	wt	drug	35862.4
		AVG	62942.6				AVG	58032.5				AVG	71497.4				AVG	80607				AVG	64028.4
		SEM	11459.5				SEM	11611.8				SEM	13338.7				SEM	12420				SEM	6748.49
1317	het	drug	78637		1317	het	drug	35790.9		1317	het	drug	18684.8		1317	het	drug	18909.9		1317	het	drug	36510.2
1327	het	drug	58110.5		1327	het	drug	63796.2		1327	het	drug	42390.5		1327	het	drug	52528.2		1327	het	drug	53807.9
1342	het	drug	25727.1		1342	het	drug	44222.7		1342	het	drug	45268.3		1342	het	drug	41614.3		1342	het	drug	25374.9
1347	het	drug	39943		1347	het	drug	5703.08		1347	het	drug	5840.53		1347	het	drug	5369.02		1347	het	drug	22143
1351	het	drug	18345.3		1351	het	drug	2402.37		1351	het	drug	4654.7		1351	het	drug	1580.49		1351	het	drug	21176.8
1353	het	drug	84154.2		1353	het	drug	95790.3		1353	het	drug	98959.9		1353	het	drug	103390		1353	het	drug	95893.1
1363	het	drug	71185.7		1363	het	drug	55421.7		1363	het	drug	48803.5		1363	het	drug	47352.2		1363	het	drug	44111.4
1372	het	drug	6487.49		1372	het	drug	5260.12		1372	het	drug	17672		1372	het	drug	76945.3		1372	het	drug	40496
1382	het	drug	40018.3		1382	het	drug	2730.05		1382	het	drug	2205.38		1382	het	drug	8053.59		1382	het	drug	17571.9
1390	het	drug	16119.1		1390	het	drug	130.155		1390	het	drug	1873.36		1390	het	drug	5489.37		1390	het	drug	2507.32
1392	het	drug	17959.4		1392	het	drug	9047.22		1392	het	drug	5210.49		1392	het	drug	2294.56		1392	het	drug	5416.26
		AVG	41517				AVG	29117.7				AVG	26505.8				AVG	33047.9				AVG	33182.6
		SEM	8700.26				SEM	10189.7				SEM	9510.85				SEM	10871.4				SEM	8261.13
Challenge DAY - over time
DAY11 - Challenge
mouse ID	genotype	treatment	Group		Bin1	Bin2	Bin3	Bin4	Bin5	Bin6	Bin7	Bin8	Bin9	Bin10	Bin11	Bin12	SUM before	SUM after
1324	wt	saline	1	Acute Amphetamine (2mg/kg)	66.4196	367.453	455.296	318.782	1279.85	2425.56	2110.74	1063.63	1374.14	703.763	767.561	964.881	889.169	11008.9
1346	wt	saline	1	Acute Amphetamine (2mg/kg)	1093.27	2305.01	2210.68	3528.63	4852.79	5913.48	6201.63	6580.04	6164.4	4408.61	4704.52	3921.29	5608.97	46275.4
1350	wt	saline	2	Acute Amphetamine (2mg/kg)	274.468	68.58	0	486.656	245.961	377.684	502.263	974.167	1241.07	889.354	705.752	283.817	343.048	5706.72
1355	wt	saline	2	Acute Amphetamine (2mg/kg)	36.7692	100.492	0	368.484	837.835	810.358	1037.11	1507.45	1965.79	2090.46	3238.86	3106.14	137.261	14962.5
1361	wt	saline	3	Acute Amphetamine (2mg/kg)	1754.98	2286.03	2518.85	3203.66	5256.8	6189.72	5968.48	5179.39	4606.56	3065.69	3025.74	2546.58	6559.86	39042.6
1377	wt	saline	5	Acute Amphetamine (2mg/kg)	383.554	159.331	141.286	313.768	375.894	459.659	326.579	274.316	577.502	306.815	407.532	167.376	684.171	3209.44
1379	wt	saline	5	Acute Amphetamine (2mg/kg)	484.39	718.032	838.804	282.133	1536.38	2839.52	3817.53	4202.1	5074.09	4658.7	5056.15	4508.12	2041.23	31974.7
1384	wt	saline	6	Acute Amphetamine (2mg/kg)	1552.52	1431.62	1708.71	668.493	558.419	657.634	607.758	769.998	953.38	1713.13	2679.53	3983.71	4692.86	12592
1386	wt	saline	6	Acute Amphetamine (2mg/kg)	242.378	439.079	558.098	722.102	247.388	252.59	275.205	564.682	856.507	365.458	258.075	656.95	1239.56	4198.96
1388	wt	saline	4	Acute Amphetamine (2mg/kg)	778.397	795.037	761.749	825.76	2454.08	5180.37	7376.2	7369.6	6866.58	5554.13	4605.14	5362.05	2335.18	45593.9
				AVG	666.715	867.067	919.348	1071.85	1764.54	2510.66	2822.35	2848.54	2968	2375.61	2544.89	2550.09	2453.13	21456.5
				SEM	203.91	285.15	304.736	408.681	622.076	805.362	927.915	904.651	811.15	645.685	631.334	637.277	776.89	5802.55
1328	het	saline	1	Acute Amphetamine (2mg/kg)	1032.11	1542.97	972.891	574.554	496.606	754.53	494.996	1288.73	2364.69	2658.39	2568.59	2313.78	3547.96	13514.9
1339	het	saline	1	Acute Amphetamine (2mg/kg)	631.206	1142.32	1186.28	1123.39	1075.64	2300.55	4172.61	4599.25	4446.05	4114.36	3796.68	3882.8	2959.81	29511.3
1341	het	saline	2	Acute Amphetamine (2mg/kg)	2337.53	2928.41	2215.44	661.941	577.602	2503.02	4518.37	5976.16	6218.82	5121.77	5659.38	4827.27	7481.39	36064.3
1344	het	saline	2	Acute Amphetamine (2mg/kg)	0	0	0	625.649	983.313	1731.34	1513.74	1673.47	1784.82	2222.48	1263.97	1069.06	0	12867.8
1348	het	saline	3	Acute Amphetamine (2mg/kg)	106.044	139.706	136.528	152.405	132.569	175.671	199.442	168.938	910.032	1319.26	1394.78	1705.11	382.277	6158.21
1352	het	saline	3	Acute Amphetamine (2mg/kg)	223.423	306.735	475.331	902.697	780.479	1794.19	2302.64	3119.02	2689.92	2416.28	2308.13	2196.06	1005.49	18509.4
1356	het	saline	4	Acute Amphetamine (2mg/kg)	223.126	322.392	803.589	1600.89	2908.64	5572.81	4290.54	5131.01	4697.88	3462.53	3556.07	2912.63	1349.11	34133
1364	het	saline	4	Acute Amphetamine (2mg/kg)	392.249	935.453	565.297	38.5892	336.86	578.892	357.949	489.703	987.097	985.877	527.199	650.02	1893	4952.18
1381	het	saline	6	Acute Amphetamine (2mg/kg)	820.376	612.677	66.552	200.17	240.535	469.164	878.754	1347.35	1221.59	1041.18	1362.09	1067.19	1499.6	7828.03
1383	het	saline	6	Acute Amphetamine (2mg/kg)	695.596	724.95	793.608	512.78	0	58.42	0	142.927	494.047	541.07	791.422	1112.23	2214.15	3652.89
1387	het	saline	5	Acute Amphetamine (2mg/kg)	115.178	0	0	123.199	0	201.017	348.521	305.887	550.487	760.184	541.406	782.227	115.178	3612.93
1391	het	saline	5	Acute Amphetamine (2mg/kg)	926.919	292.615	142.578	1103.79	1814.7	2869.99	2438.06	2456.12	2650.64	3691.9	3354.01	3357.88	1362.11	23737.1
				AVG	625.313	745.686	613.175	635.004	778.912	1584.13	1792.97	2224.88	2418.01	2361.27	2260.31	2156.35	1984.17	16211.8
				SEM	193.482	251.735	195.288	144.368	256.729	482.357	518.282	618.005	554.701	448.914	477.175	406.313	614.272	3621.71
1317	het	drug	1	Acute Amphetamine (2mg/kg)	655.627	1469.79	1012.68	4678.68	5990.99	4501.28	4719.59	4433.61	3779.95	2963.5	2895.18	2547.46	3138.09	36510.2
1327	het	drug	1	Acute Amphetamine (2mg/kg)	2010.03	1665.97	1458.84	5462.66	8540.76	9001.94	8993.48	7018.58	6121.06	3909.24	2857.33	1902.89	5134.84	53807.9
1342	het	drug	2	Acute Amphetamine (2mg/kg)	0	0	0	2486.39	4432.91	4814.75	4096.4	3923.3	3693.55	1894.05	33.5579	0	0	25374.9
1347	het	drug	3	Acute Amphetamine (2mg/kg)	1426.62	1694.59	2288.97	1728.77	697.792	245.338	2088.17	2953.85	3453.75	3505.57	3797.73	3672.04	5410.19	22143
1351	het	drug	3	Acute Amphetamine (2mg/kg)	504.625	1349.28	834.278	2075.81	1724.04	422.707	639.709	1458.81	3028.36	3748.79	4022.06	4056.5	2688.19	21176.8
1353	het	drug	4	Acute Amphetamine (2mg/kg)	558.907	172.667	686.976	8980.09	13761.6	14299.3	16340.7	16237.6	12847.5	5537.06	5210.32	2678.87	1418.55	95893.1
1363	het	drug	4	Acute Amphetamine (2mg/kg)	1599.77	1424.72	1363.61	6878.52	5675.07	6249.93	6438.77	6028.46	4325.44	3381.43	2573.29	2560.49	4388.11	44111.4
1372	het	drug	5	Acute Amphetamine (2mg/kg)	752.873	766.445	211.57	3823.2	3530.13	2480.53	2012.41	5363.83	6656.47	6054.31	5664.5	4910.67	1730.89	40496
1382	het	drug	6	Acute Amphetamine (2mg/kg)	692.75	927.229	419.094	3562.12	1964.47	126.678	39.4138	654.956	860.296	2295.37	4322.27	3746.33	2039.07	17571.9
1390	het	drug	5	Acute Amphetamine (2mg/kg)	480.669	34.4158	393.327	442.474	305.475	0	0	75.3841	270.82	159.975	656.132	597.059	908.411	2507.32
1392	het	drug	6	Acute Amphetamine (2mg/kg)	204.838	0	632.409	688.408	84.5849	0	0	0	241.854	1522.54	939.087	1939.78	837.247	5416.26
				AVG	807.883	864.101	845.614	3709.74	4246.17	3831.13	4124.42	4377.13	4116.28	3179.26	2997.41	2601.1	2517.6	33182.6
				SEM	194.214	221.869	208.084	835.213	1310.07	1459.33	1581.5	1461.57	1136.07	540.093	584.539	465.06	573.909	8261.13
1337	wt	drug	1	Acute Amphetamine (2mg/kg)	985.195	1089.37	1261.72	3782.63	6275.66	5713.48	5476.21	6810.55	5276.96	5799.41	3506.67	3362.87	3336.28	46004.4
1343	wt	drug	1	Acute Amphetamine (2mg/kg)	907.556	514.289	434.095	7059.75	12957.7	13447.2	13066.3	11056.1	3401.02	3053.26	2012.96	698.445	1855.94	66752.9
1349	wt	drug	2	Acute Amphetamine (2mg/kg)	103.694	189.056	98.9622	5543.37	6551.74	5958.67	6625.2	5899.19	2756.13	2218.7	1374.66	2163.43	391.713	39091.1
1354	wt	drug	2	Acute Amphetamine (2mg/kg)	1616.17	1762.37	1779.19	8781.81	11883.1	12153.7	12793.6	12998.9	10384.1	4751.9	2279.02	2650.38	5157.73	78676.5
1357	wt	drug	3	Acute Amphetamine (2mg/kg)	814.417	1422.3	2775.1	9230.96	11780.7	11006.1	13081.5	13819.3	12725.6	7250.24	4683.74	4485.18	5011.81	88063.2
1359	wt	drug	4	Acute Amphetamine (2mg/kg)	1908.27	2101.51	2029.76	5528.55	8007.21	7724.55	8329.1	8897.49	9006.34	2358.6	2069.92	1879.02	6039.54	53800.8
1360	wt	drug	3	Acute Amphetamine (2mg/kg)	1922.4	2247.59	1509.49	5530.23	4938.82	5798.03	5588.51	6504.21	6245.09	6439.64	3318.38	3478.08	5679.48	47841
1375	wt	drug	5	Acute Amphetamine (2mg/kg)	893.384	619.926	362.38	8168.92	10990	9979.91	11588.5	14172.9	14613.3	6494.26	5327.57	3485.33	1875.69	84820.7
1380	wt	drug	6	Acute Amphetamine (2mg/kg)	850.183	1402.59	2500.56	9829.39	10439.7	11486.5	10662.1	13096.8	15516.3	12815.6	8966.75	6076.65	4753.34	98889.8
1385	wt	drug	6	Acute Amphetamine (2mg/kg)	714.693	962.896	1694.37	5056.2	8005.98	8271	8476.72	8570.22	8916.41	7415.89	5375.54	4421.82	3371.96	64509.8
1389	wt	drug	4	Acute Amphetamine (2mg/kg)	1578.05	1681.47	2691.45	2399.49	6126.97	5966.86	5094.83	2844.6	3124.15	2402.15	2511.15	5392.21	5950.97	35862.4
				AVG	1117.64	1272.12	1557.92	6446.48	8905.24	8864.18	9162.06	9515.49	8360.48	5545.42	3766.03	3463.04	3947.68	64028.4
				SEM	178.861	209.49	297.593	747.655	881.926	907.465	1012.07	1194.93	1454.59	994.829	697.43	500.289	605.413	6748.49
STATISTICS
Figure 6—figure supplement 1A (stopGLS1 mice AMPH sensitization) - RM ANOVA
Amphetamine Injections (4 days)												Amphetamine Injection DAY 1											Amphetamine Injection DAY 2											Amphetamine Injection DAY 3											Amphetamine Injection DAY 4
Tests of Within-Subjects Effects												Tests of Between-Subjects Effects											Tests of Between-Subjects Effects											Tests of Between-Subjects Effects											Tests of Between-Subjects Effects
Measure:	MEASURE_1											Dependent Variable:	day1										Dependent Variable:	day2										Dependent Variable:	day3										Dependent Variable:	day4
Source		Type III Sum of Squares	df	Mean Square	F	Sig.	Partial Eta Squared	Noncent. Parameter	Observed Powera			Source	Type III Sum of Squares	df	Mean Square	F	Sig.	Partial Eta Squared	Noncent. Parameter	Observed Powerb			Source	Type III Sum of Squares	df	Mean Square	F	Sig.	Partial Eta Squared	Noncent. Parameter	Observed Powerb			Source	Type III Sum of Squares	df	Mean Square	F	Sig.	Partial Eta Squared	Noncent. Parameter	Observed Powerb			Source	Type III Sum of Squares	df	Mean Square	F
days	Sphericity Assumed	1.47959e+09	3	4.93195e+08	3.30767	0.0225636	0.076376	9.923	0.742245			Corrected Model	30790547617.998a	3	1.02635e+10	19.7362	5.19939e-08	0.596809	59.2085	0.999999			Corrected Model	22779405643.841a	3	7.59314e+09	12.5557	6.32289e-06	0.484981	37.667	0.99949			Corrected Model	33997520908.092a	3	1.13325e+10	16.6719	3.5178e-07	0.555632	50.0156	0.999983			Corrected Model	41212877638.467a	3	1.37376e+10	19.2865
	Greenhouse-Geisser	1.47959e+09	1.84933	8.00065e+08	3.30767	0.0457273	0.076376	6.11698	0.587611			Intercept	3.17671e+10	1	3.17671e+10	61.0862	1.40731e-09	0.604298	61.0862	1			Intercept	2.38089e+10	1	2.38089e+10	39.3694	1.94367e-07	0.496027	39.3694	0.999984			Intercept	3.01728e+10	1	3.01728e+10	44.3888	5.5504e-08	0.526003	44.3888	0.999997			Intercept	4.32689e+10	1	4.32689e+10	60.7459
	Huynh-Feldt	1.47959e+09	2.08045	7.11185e+08	3.30767	0.0396511	0.076376	6.88145	0.623952			genotype	1.44697e+09	1	1.44697e+09	2.78244	0.103114	0.0650369	2.78244	0.37014			genotype	2.64113e+09	1	2.64113e+09	4.36724	0.0430396	0.098434	4.36724	0.531723			genotype	5.87811e+09	1	5.87811e+09	8.6476	0.00542124	0.17776	8.6476	0.818443			genotype	7.53059e+09	1	7.53059e+09	10.5723
	Lower-bound	1.47959e+09	1	1.47959e+09	3.30767	0.0764501	0.076376	3.30767	0.426727			treatment	2.80565e+10	1	2.80565e+10	53.9511	6.22936e-09	0.574246	53.9511	1			treatment	1.79943e+10	1	1.79943e+10	29.7545	2.75417e-06	0.42656	29.7545	0.99961			treatment	2.26989e+10	1	2.26989e+10	33.3936	9.67368e-07	0.454993	33.3936	0.999881			treatment	2.82765e+10	1	2.82765e+10	39.6978
days * genotype	Sphericity Assumed	1.50988e+09	3	5.03293e+08	3.37539	0.020705	0.0778181	10.1262	0.751749			genotype * treatment	1.08071e+09	1	1.08071e+09	2.07814	0.157205	0.0493877	2.07814	0.290541			genotype * treatment	1.96323e+09	1	1.96323e+09	3.2463	0.0791253	0.0750655	3.2463	0.420258			genotype * treatment	5.21885e+09	1	5.21885e+09	7.67773	0.00844095	0.161034	7.67773	0.771516			genotype * treatment	4.98847e+09	1	4.98847e+09	7.00338
	Greenhouse-Geisser	1.50988e+09	1.84933	8.16445e+08	3.37539	0.0431122	0.0778181	6.24222	0.59682			Error	2.08015e+10	40	5.20036e+08								Error	2.41903e+10	40	6.04758e+08								Error	2.71895e+10	40	6.79739e+08								Error	2.84918e+10	40	7.12294e+08
	Huynh-Feldt	1.50988e+09	2.08045	7.25746e+08	3.37539	0.0371774	0.0778181	7.02234	0.633418			Total	8.34075e+10	44									Total	7.07782e+10	44									Total	9.14154e+10	44									Total	1.12848e+11	44
	Lower-bound	1.50988e+09	1	1.50988e+09	3.37539	0.0736142	0.0778181	3.37539	0.433819			Corrected Total	5.1592e+10	43									Corrected Total	4.69697e+10	43									Corrected Total	6.11871e+10	43									Corrected Total	6.97046e+10	43
days * treatment	Sphericity Assumed	7.83151e+08	3	2.6105e+08	1.75076	0.160322	0.0419336	5.25228	0.447258
	Greenhouse-Geisser	7.83151e+08	1.84933	4.23477e+08	1.75076	0.183062	0.0419336	3.23774	0.342306																									Amphetamine Injection DAY 3, within each drug treatment											Amphetamine Injection DAY 4, within each drug treatment
	Huynh-Feldt	7.83151e+08	2.08045	3.76433e+08	1.75076	0.178674	0.0419336	3.64238	0.364718
	Lower-bound	7.83151e+08	1	7.83151e+08	1.75076	0.193295	0.0419336	1.75076	0.252493																									AMPH											AMPH
days * genotype * treatment	Sphericity Assumed	1.1454e+09	3	3.81802e+08	2.56059	0.0581608	0.0601635	7.68178	0.618609
	Greenhouse-Geisser	1.1454e+09	1.84933	6.19361e+08	2.56059	0.0882295	0.0601635	4.73539	0.477196																									Tests of Between-Subjects Effectsa											Tests of Between-Subjects Effectsa
	Huynh-Feldt	1.1454e+09	2.08045	5.50555e+08	2.56059	0.0811853	0.0601635	5.3272	0.508734																									Dependent Variable:	day3										Dependent Variable:	day4
	Lower-bound	1.1454e+09	1	1.1454e+09	2.56059	0.117427	0.0601635	2.56059	0.345473																									Source	Type III Sum of Squares	df	Mean Square	F	Sig.	Partial Eta Squared	Noncent. Parameter	Observed Powerc			Source	Type III Sum of Squares	df	Mean Square	F
Error(days)	Sphericity Assumed	1.78928e+10	120	1.49107e+08																														Corrected Model	11133354535.815b	1	1.11334e+10	8.29682	0.00924925	0.293207	8.29682	0.782273			Corrected Model	12440264448.637b	1	1.24403e+10	9.13239
	Greenhouse-Geisser	1.78928e+10	73.9734	2.41882e+08																														Intercept	5.28254e+10	1	5.28254e+10	39.3666	3.98594e-06	0.66311	39.3666	0.999967			Intercept	7.1046e+10	1	7.1046e+10	52.1548
	Huynh-Feldt	1.78928e+10	83.2181	2.15011e+08																														genotype	1.11334e+10	1	1.11334e+10	8.29682	0.00924925	0.293207	8.29682	0.782273			genotype	1.24403e+10	1	1.24403e+10	9.13239
	Lower-bound	1.78928e+10	40	4.4732e+08																														Error	2.68377e+10	20	1.34188e+09								Error	2.72443e+10	20	1.36221e+09
																																		Total	9.07964e+10	22									Total	1.10731e+11	22
Tests of Between-Subjects Effects																																		Corrected Total	3.7971e+10	21									Corrected Total	3.96845e+10	21
Measure:	MEASURE_1
Transformed Variable:	Average																																	VEH											VEH
Source	Type III Sum of Squares	df	Mean Square	F	Sig.	Partial Eta Squared	Noncent. Parameter	Observed Powera
Intercept	1.27538e+11	1	1.27538e+11	61.6273	1.26277e-09	0.606405	61.6273	1																										Tests of Between-Subjects Effectsa											Tests of Between-Subjects Effectsa
genotype	1.59869e+10	1	1.59869e+10	7.72499	0.00825826	0.161865	7.72499	0.77402																										Dependent Variable:	day3										Dependent Variable:	day4
treatment	9.6243e+10	1	9.6243e+10	46.5053	3.34823e-08	0.5376	46.5053	0.999999																										Source	Type III Sum of Squares	df	Mean Square	F	Sig.	Partial Eta Squared	Noncent. Parameter	Observed Powerc			Source	Type III Sum of Squares	df	Mean Square	F
genotype * treatment	1.21059e+10	1	1.21059e+10	5.84963	0.0202238	0.127583	5.84963	0.655526																										Corrected Model	9759528.452b	1	9.75953e+06	0.55469	0.46507	0.0269861	0.55469	0.109374			Corrected Model	129870660.508b	1	1.29871e+08	2.08212
Error	8.27803e+10	40	2.06951e+09																															Intercept	2.64359e+08	1	2.64359e+08	15.025	0.000939551	0.42898	15.025	0.957667			Intercept	7.9096e+08	1	7.9096e+08	12.6809
																																		genotype	9.75953e+06	1	9.75953e+06	0.55469	0.46507	0.0269861	0.55469	0.109374			genotype	1.29871e+08	1	1.29871e+08	2.08212
																																		Error	3.51891e+08	20	1.75946e+07								Error	1.24748e+09	20	6.23742e+07
																																		Total	6.18982e+08	22									Total	2.11723e+09	22
																																		Corrected Total	3.61651e+08	21									Corrected Total	1.37736e+09	21
																																		Amphetamine Injection DAY 3, within each genotype											Amphetamine Injection DAY 4, within each genotype
																																		CTRL											CTRL
																																		Tests of Between-Subjects Effectsa											Tests of Between-Subjects Effectsa
																																		Dependent Variable:	day3										Dependent Variable:	day4
																																		Source	Type III Sum of Squares	df	Mean Square	F	Sig.	Partial Eta Squared	Noncent. Parameter	Observed Powerc			Source	Type III Sum of Squares	df	Mean Square	F
																																		Corrected Model	23758494814.004b	1	2.37585e+10	25.0427	7.87463e-05	0.5686	25.0427	0.997269			Corrected Model	27264729421.760b	1	2.72647e+10	31.8275
																																		Intercept	2.99749e+10	1	2.99749e+10	31.5951	2.02539e-05	0.624469	31.5951	0.99961			Intercept	4.15542e+10	1	4.15542e+10	48.5083
																																		treatment	2.37585e+10	1	2.37585e+10	25.0427	7.87463e-05	0.5686	25.0427	0.997269			treatment	2.72647e+10	1	2.72647e+10	31.8275
																																		Error	1.80257e+10	19	9.48721e+08								Error	1.62762e+10	19	8.56641e+08
																																		Total	7.44285e+10	21									Total	8.84644e+10	21
																																		Corrected Total	4.17842e+10	20									Corrected Total	4.35409e+10	20
																																		stopGLS1 HET											stopGLS1 HET
																																		Tests of Between-Subjects Effectsa											Tests of Between-Subjects Effectsa
																																		Dependent Variable:	day3										Dependent Variable:	day4
																																		Source	Type III Sum of Squares	df	Mean Square	F	Sig.	Partial Eta Squared	Noncent. Parameter	Observed Powerc			Source	Type III Sum of Squares	df	Mean Square	F
																																		Corrected Model	3221899241.872b	1	3.2219e+09	7.38334	0.0129067	0.260129	7.38334	0.736098			Corrected Model	4983209467.833b	1	4.98321e+09	8.56672
																																		Intercept	4.93298e+09	1	4.93298e+09	11.3045	0.00294807	0.349935	11.3045	0.893431			Intercept	7.70017e+09	1	7.70017e+09	13.2375
																																		treatment	3.2219e+09	1	3.2219e+09	7.38334	0.0129067	0.260129	7.38334	0.736098			treatment	4.98321e+09	1	4.98321e+09	8.56672
																																		Error	9.16386e+09	21	4.36374e+08								Error	1.22156e+10	21	5.81694e+08
																																		Total	1.69869e+10	23									Total	2.43833e+10	23
																																		Corrected Total	1.23858e+10	22									Corrected Total	1.71988e+10	22
Figure 6—figure supplement 1A (stopGLS1 mice AMPH sensitization - Challenge day)
Amphetamine Challenge										Amphetamine Challenge, within genotype											Amphetamine Challenge, within drug treatment
Tests of Between-Subjects Effects										CTRL											AMPH
Dependent Variable:	challenge
Source	Type III Sum of Squares	df	Mean Square	F	Sig.	Partial Eta Squared	Noncent. Parameter	Observed Powerb		Tests of Between-Subjects Effectsa											Tests of Between-Subjects Effectsa
Corrected Model	15289505599.374a	3	5.0965e+09	12.9903	4.56794e-06	0.493485	38.971	0.999641		Dependent Variable:	challenge										Dependent Variable:	challenge
Intercept	4.98217e+10	1	4.98217e+10	126.989	5.51939e-14	0.760463	126.989	1		Source	Type III Sum of Squares	df	Mean Square	F	Sig.	Partial Eta Squared	Noncent. Parameter	Observed Powerc			Source	Type III Sum of Squares	df	Mean Square	F	Sig.	Partial Eta Squared	Noncent. Parameter	Observed Powerc
genotype	3.56707e+09	1	3.56707e+09	9.09201	0.00444448	0.185204	9.09201	0.837003		Corrected Model	9493345451.113b	1	9.49335e+09	24.7717	8.36701e-05	0.565929	24.7717	0.997046			Corrected Model	5233042407.862b	1	5.23304e+09	9.19785	0.00657174	0.315018	9.19785	0.822383
treatment	9.70921e+09	1	9.70921e+09	24.7475	1.28343e-05	0.382216	24.7475	0.998087		Intercept	3.82783e+10	1	3.82783e+10	99.8822	5.31321e-09	0.840178	99.8822	1			Intercept	5.19749e+10	1	5.19749e+10	91.3537	6.72998e-09	0.820392	91.3537	1
genotype * treatment	1.79492e+09	1	1.79492e+09	4.57501	0.0385986	0.102636	4.57501	0.550735		treatment	9.49335e+09	1	9.49335e+09	24.7717	8.36701e-05	0.565929	24.7717	0.997046			genotype	5.23304e+09	1	5.23304e+09	9.19785	0.00657174	0.315018	9.19785	0.822383
Error	1.56932e+10	40	3.9233e+08							Error	7.28145e+09	19	3.83234e+08								Error	1.13788e+10	20	5.68942e+08
Total	8.06589e+10	44								Total	5.69813e+10	21									Total	6.85868e+10	22
Corrected Total	3.09827e+10	43								Corrected Total	1.67748e+10	20									Corrected Total	1.66119e+10	21
										stopGLS1 HET											VEH
										Tests of Between-Subjects Effectsa											Tests of Between-Subjects Effectsa
										Dependent Variable:	challenge										Dependent Variable:	challenge
										Source	Type III Sum of Squares	df	Mean Square	F	Sig.	Partial Eta Squared	Noncent. Parameter	Observed Powerc			Source	Type III Sum of Squares	df	Mean Square	F	Sig.	Partial Eta Squared	Noncent. Parameter	Observed Powerc
										Corrected Model	1652914039.018b	1	1.65291e+09	4.12651	0.0550638	0.164229	4.12651	0.491363			Corrected Model	150036448.845b	1	1.50036e+08	0.69552	0.414143	0.0336073	0.69552	0.124856
										Intercept	1.40024e+10	1	1.40024e+10	34.9571	7.20954e-06	0.624713	34.9571	0.999877			Intercept	7.73949e+09	1	7.73949e+09	35.8777	7.40769e-06	0.642076	35.8777	0.999902
										treatment	1.65291e+09	1	1.65291e+09	4.12651	0.0550638	0.164229	4.12651	0.491363			genotype	1.50036e+08	1	1.50036e+08	0.69552	0.414143	0.0336073	0.69552	0.124856
										Error	8.41175e+09	21	4.0056e+08								Error	4.31437e+09	20	2.15718e+08
										Total	2.36776e+10	23									Total	1.20721e+10	22
										Corrected Total	1.00647e+10	22									Corrected Total	4.4644e+09	21
Figure 6—figure supplement 1B (stopGLS1 mice AMPH sensitization - Challenge day, time course)
Amphetamine Challenge, before injection, within each drug treatment												Amphetamine Challenge, after injection, within each drug treatment
AMPH												AMPH
Tests of Within-Subjects Effectsa												Tests of Within-Subjects Effectsa
Measure:	MEASURE_1											Measure:	MEASURE_1
Source		Type III Sum of Squares	df	Mean Square	F	Sig.	Partial Eta Squared	Noncent. Parameter	Observed Powerb			Source		Type III Sum of Squares	df	Mean Square	F	Sig.	Partial Eta Squared	Noncent. Parameter	Observed Powerb
bins	Sphericity Assumed	631296	2	315648	2.01315	0.146877	0.0914523	4.02631	0.391009			bins	Sphericity Assumed	3.91178e+08	8	4.88973e+07	10.9686	2.813e-12	0.354185	87.7492	1
	Greenhouse-Geisser	631296	1.47912	426804	2.01315	0.160703	0.0914523	2.9777	0.33158				Greenhouse-Geisser	3.91178e+08	1.81328	2.1573e+08	10.9686	0.000281899	0.354185	19.8892	0.979405
	Huynh-Feldt	631296	1.64899	382838	2.01315	0.156264	0.0914523	3.31967	0.351523				Huynh-Feldt	3.91178e+08	2.0835	1.8775e+08	10.9686	0.000123466	0.354185	22.8532	0.988779
	Lower-bound	631296	1	631296	2.01315	0.171338	0.0914523	2.01315	0.271786				Lower-bound	3.91178e+08	1	3.91178e+08	10.9686	0.00348004	0.354185	10.9686	0.882829
bins * genotype	Sphericity Assumed	484524	2	242262	1.54511	0.225749	0.0717151	3.09022	0.308824			bins * genotype	Sphericity Assumed	1.4045e+08	8	1.75563e+07	3.93823	0.000282284	0.164516	31.5058	0.989226
	Greenhouse-Geisser	484524	1.47912	327575	1.54511	0.230002	0.0717151	2.28541	0.26417				Greenhouse-Geisser	1.4045e+08	1.81328	7.74566e+07	3.93823	0.0318959	0.164516	7.1411	0.643451
	Huynh-Feldt	484524	1.64899	293831	1.54511	0.229046	0.0717151	2.54787	0.279082				Huynh-Feldt	1.4045e+08	2.0835	6.74106e+07	3.93823	0.0256901	0.164516	8.20531	0.688645
	Lower-bound	484524	1	484524	1.54511	0.228235	0.0717151	1.54511	0.219677				Lower-bound	1.4045e+08	1	1.4045e+08	3.93823	0.0610912	0.164516	3.93823	0.471761
Error(bins)	Sphericity Assumed	6.27171e+06	40	156793								Error(bins)	Sphericity Assumed	7.13266e+08	160	4.45791e+06
	Greenhouse-Geisser	6.27171e+06	29.5825	212008									Greenhouse-Geisser	7.13266e+08	36.2655	1.96679e+07
	Huynh-Feldt	6.27171e+06	32.9798	190168									Huynh-Feldt	7.13266e+08	41.6701	1.7117e+07
	Lower-bound	6.27171e+06	20	313586									Lower-bound	7.13266e+08	20	3.56633e+07
Tests of Between-Subjects Effectsa
Measure:	MEASURE_1											Tests of Between-Subjects Effectsa
Transformed Variable:	Average											Measure:	MEASURE_1
Source	Type III Sum of Squares	df	Mean Square	F	Sig.	Partial Eta Squared	Noncent. Parameter	Observed Powerb				Transformed Variable:	Average
Intercept	7.6633e+07	1	7.6633e+07	66.0729	9.10453e-08	0.767639	66.0729	1				Source	Type III Sum of Squares	df	Mean Square	F	Sig.	Partial Eta Squared	Noncent. Parameter	Observed Powerb
genotype	3.74941e+06	1	3.74941e+06	3.23273	0.0872941	0.139146	3.23273	0.402078				Intercept	5.77499e+09	1	5.77499e+09	91.3536	6.73001e-09	0.820392	91.3536	1
Error	2.31965e+07	20	1.15983e+06									genotype	5.81449e+08	1	5.81449e+08	9.19785	0.00657175	0.315018	9.19785	0.822383
												Error	1.26432e+09	20	6.32158e+07
VEH												VEH
Tests of Within-Subjects Effectsa												Tests of Within-Subjects Effectsa
Measure:	MEASURE_1											Measure:	MEASURE_1
Source		Type III Sum of Squares	df	Mean Square	F	Sig.	Partial Eta Squared	Noncent. Parameter	Observed Powerb			Source		Type III Sum of Squares	df	Mean Square	F	Sig.	Partial Eta Squared	Noncent. Parameter	Observed Powerb
bins	Sphericity Assumed	303887	2	151943	2.19161	0.124975	0.0987584	4.38322	0.421479			bins	Sphericity Assumed	6.66657e+07	8	8.33321e+06	10.0382	2.72935e-11	0.334181	80.3056	1
	Greenhouse-Geisser	303887	1.6377	185557	2.19161	0.135873	0.0987584	3.58919	0.377184				Greenhouse-Geisser	6.66657e+07	2.42314	2.75122e+07	10.0382	9.10833e-05	0.334181	24.3239	0.990749
	Huynh-Feldt	303887	1.85322	163978	2.19161	0.129339	0.0987584	4.06152	0.403875				Huynh-Feldt	6.66657e+07	2.91912	2.28376e+07	10.0382	2.33576e-05	0.334181	29.3027	0.996696
	Lower-bound	303887	1	303887	2.19161	0.154346	0.0987584	2.19161	0.291443				Lower-bound	6.66657e+07	1	6.66657e+07	10.0382	0.0048331	0.334181	10.0382	0.853842
bins * genotype	Sphericity Assumed	201181	2	100591	1.4509	0.246427	0.0676383	2.90181	0.292043			bins * genotype	Sphericity Assumed	5.19127e+06	8	648909	0.781677	0.619433	0.0376137	6.25341	0.354548
	Greenhouse-Geisser	201181	1.6377	122844	1.4509	0.24782	0.0676383	2.37614	0.263456				Greenhouse-Geisser	5.19127e+06	2.42314	2.14238e+06	0.781677	0.48551	0.0376137	1.89411	0.188781
	Huynh-Feldt	201181	1.85322	108558	1.4509	0.247209	0.0676383	2.68884	0.280618				Huynh-Feldt	5.19127e+06	2.91912	1.77837e+06	0.781677	0.505841	0.0376137	2.28181	0.205615
	Lower-bound	201181	1	201181	1.4509	0.242444	0.0676383	1.4509	0.20913				Lower-bound	5.19127e+06	1	5.19127e+06	0.781677	0.387134	0.0376137	0.781677	0.134382
Error(bins)	Sphericity Assumed	2.77318e+06	40	69329.6								Error(bins)	Sphericity Assumed	1.32824e+08	160	830150
	Greenhouse-Geisser	2.77318e+06	32.7539	84667.2									Greenhouse-Geisser	1.32824e+08	48.4627	2.74074e+06
	Huynh-Feldt	2.77318e+06	37.0643	74820.8									Huynh-Feldt	1.32824e+08	58.3824	2.27507e+06
	Lower-bound	2.77318e+06	20	138659									Lower-bound	1.32824e+08	20	6.6412e+06
Tests of Between-Subjects Effectsa												Measure:	MEASURE_1
Measure:	MEASURE_1											Transformed Variable:	Average
Transformed Variable:	Average											Source	Type III Sum of Squares	df	Mean Square	F	Sig.	Partial Eta Squared	Noncent. Parameter	Observed Powerb
Source	Type III Sum of Squares	df	Mean Square	F	Sig.	Partial Eta Squared	Noncent. Parameter	Observed Powerb				Intercept	8.59943e+08	1	8.59943e+08	35.8777	7.40768e-06	0.642076	35.8777	0.999902
Intercept	3.57994e+07	1	3.57994e+07	22.719	0.000117809	0.531824	22.719	0.994874				genotype	1.66707e+07	1	1.66707e+07	0.695519	0.414144	0.0336072	0.695519	0.124855
genotype	399849	1	399849	0.253752	0.619949	0.0125286	0.253752	0.0767835				Error	4.79374e+08	20	2.39687e+07
Error	3.1515e+07	20	1.57575e+06
[truncated: 4 more columns]
