# Supplementary material for: Dopamine neuron dependent behaviors mediated by glutamate cotransmission
Source: eLife. 2017 Jul 13;6:e27566. doi: 10.7554/eLife.27566 (PMC5599237; doi:10.7554/eLife.27566)
Supplement: Figure 6—figure supplement 2—source data 2. — DOI: http://dx.doi.org/10.7554/eLife.27566.027 [file elife-27566-fig6-figsupp2-data2.xlsx]

## Sheet: Figure 6 - Supp 2B
Rosa26 ERT2 cre GLS1 HET mice - PAG portein (Simon Simple WES)
Sample	Genotype	Treatment	Experiment trial	Oil/captisol	Recombination time (days)	DATA PONTS
4575	iHET	TMX	5	captisol	41	0.0830409
4580	iHET	TMX	5	captisol	41	0.0839399		WT TMX
4582	iHET	TMX	5	captisol	41	0.0879553		AVG	ST DEV	SEM
4600	iHET	TMX	5	captisol	39	0.0788572		0.149181	0.028696	0.014348
4578	WT	TMX	5	captisol	41	0.137392
4581	WT	TMX	5	captisol	41	0.194985		iHET TMX
4593	WT	TMX	5	captisol	39	0.145443		AVG	ST DEV	SEM
4599	WT	TMX	5	captisol	39	0.151138		0.0834483	0.00373266	0.00215505
4701	WT	TMX	5	captisol	39	0.116947
Hipocampus Dissections
STATISTICS
Figure 6—figure supplement 2A (PAG protein in Hippocampus of GLS1 iHET mice post-tamoxifen) - ANOVA genotype efffect
Tests of Between-Subjects Effects
Dependent Variable:	protein
Source	Type III Sum of Squares	df	Mean Square	F	Sig.	Partial Eta Squared	Noncent. Parameter	Observed Powerb
Corrected Model	.010a	1	0.00960172	20.1496	0.00283604	0.74217	20.1496	0.968444
Intercept	0.120259	1	0.120259	252.368	9.49899e-07	0.973011	252.368	1
genotype	0.00960172	1	0.00960172	20.1496	0.00283604	0.74217	20.1496	0.968444
Error	0.00333564	7	0.00047652
Total	0.142465	9
Corrected Total	0.0129374	8
