# Supplementary material for: Dopamine neuron dependent behaviors mediated by glutamate cotransmission
Source: eLife. 2017 Jul 13;6:e27566. doi: 10.7554/eLife.27566 (PMC5599237; doi:10.7554/eLife.27566)
Supplement: Figure 6—figure supplement 3—source data 3. — DOI: http://dx.doi.org/10.7554/eLife.27566.029 [file elife-27566-fig6-figsupp3-data3.xlsx]

## Sheet: Figure 6 - Supp 3A & B
deltaGLS1 HET mice - Novelty-Induced Locomotion and Amphetamine Sensitization
Novelty-induced locomotion - Figure 6 Suppl 3A
Cage	Mouse ID	Genotype	Drug treatment	BM bin1	BM bin2	BM bin3	BM bin4	BM bin5	BM bin6
9	3026	CTRL	to be AMPH	1983	1683	1297	1289	1232	1032
4	3036	CTRL	to be AMPH	2288	1672	1549	1287	1031	746
5	3037	CTRL	to be AMPH	2250	1426	1639	1225	1013	612
9	3041	CTRL	to be AMPH	2593	1820	1640	1508	1433	1658
1	3077	CTRL	to be AMPH	2043	1626	1907	1644	1630	1572
2	3078	CTRL	to be AMPH	1856	1422	1375	1269	1373	1215
5	3081	CTRL	to be AMPH	1879	1681	1568	1556	1630	1583
6	3086	CTRL	to be AMPH	1713	1468	1522	1175	1392	1026
5	3955	CTRL	to be AMPH	2456	2378	2299	2340	1719	1442
8	3958	CTRL	to be AMPH	2508	2227	1848	1834	1684	1599
9	3981	CTRL	to be AMPH	2093	1655	1411	1477	1164	995
8	3023	CTRL	SAL	2970	2238	1749	1760	1613	1103
3	3035	CTRL	SAL	2489	1885	2006	1879	1736	1795
8	3040	CTRL	SAL	1990	1657	1556	1469	1092	1056
3	3079	CTRL	SAL	2349	1622	1425	971	1012	1247
3	3962	CTRL	SAL	2269	2022	2248	2057	2104	2090
5	3964	CTRL	SAL	2321	2183	2238	2323	2069	1934
10	3982	CTRL	SAL	2043	1509	1243	1089	1014	988
		CTRL	AVG	2227.39	1787.44	1695.56	1564	1441.17	1316.28
		n=18	SEM	75.3331	72.8641	79.9	97.3869	85.7552	99.8965
10	3028	HET	to be AMPH	1487	1328	1186	1102	1140	1109
6	3038	HET	to be AMPH	2194	1871	1797	1761	1423	1502
7	3087	HET	to be AMPH	1541	1118	1138	738	1110	1019
9	3089	HET	to be AMPH	1549	1076	969	764	691	511
10	3090	HET	to be AMPH	2081	1448	804	1026	1006	365
2	3952	HET	to be AMPH	1684	1284	1334	1290	1182	1287
6	3956	HET	to be AMPH	1993	1507	1241	1060	1163	1091
2	3961	HET	to be AMPH	2763	2173	2188	1948	1999	1798
4	3963	HET	to be AMPH	2003	1610	1433	1135	1207	1261
7	3998	HET	to be AMPH	2126	1717	1299	1148	1205	1058
1	3030	HET	SAL	2182	1529	1295	1141	1312	1213
7	3039	HET	SAL	2147	1547	1060	1195	859	850
3	3953	HET	SAL	1981	1460	1322	1329	1244	1304
4	3954	HET	SAL	1963	1241	1156	1177	1260	1303
7	3957	HET	SAL	2298	1770	1355	1396	1289	1316
1	3959	HET	SAL	1879	1607	2003	1861	1631	1619
6	3997	HET	SAL	1932	1785	1574	1775	1423	1155
		cHET	AVG	1988.41	1533.59	1362	1285.06	1243.76	1162.41
		n=17	SEM	78.6024	70.5054	89.2351	89.6154	72.4441	88.7467
STATISTICS
Figure 6—figure supplement 3A (deltaGLS1 mice Novelty induced locomotion) - RM ANOVA 2(genotype) x 6 (bins of 10min)
Tests of Within-Subjects Effects
Measure:	MEASURE_1
Source		Type III Sum of Squares	df	Mean Square	F	Sig.	Partial Eta Squared	Noncent. Parameter	Observed Powera
bins	Sphericity Assumed	1.67595e+07	5	3.35191e+06	91.917	7.41182e-46	0.735825	459.585	1
	Greenhouse-Geisser	1.67595e+07	2.412	6.94841e+06	91.917	2.16067e-23	0.735825	221.703	1
	Huynh-Feldt	1.67595e+07	2.69452	6.21987e+06	91.917	7.53345e-26	0.735825	247.672	1			Partial Eta square	Power
	Lower-bound	1.67595e+07	1	1.67595e+07	91.917	4.60129e-11	0.735825	91.917	1		bins	0.735825	1
bins * genotype	Sphericity Assumed	171796	5	34359.1	0.942207	0.455258	0.0277591	4.71103	0.331219		bins*genotype	0.0277591	0.331219
	Greenhouse-Geisser	171796	2.412	71225.6	0.942207	0.408445	0.0277591	2.2726	0.225411		genotype	0.153408	0.660489
	Huynh-Feldt	171796	2.69452	63757.6	0.942207	0.416112	0.0277591	2.53879	0.237889
	Lower-bound	171796	1	171796	0.942207	0.338772	0.0277591	0.942207	0.156347
Error(bins)	Sphericity Assumed	6.017e+06	165	36466.7
	Greenhouse-Geisser	6.017e+06	79.5959	75594.4
	Huynh-Feldt	6.017e+06	88.919	67668.3
	Lower-bound	6.017e+06	33	182333
Tests of Between-Subjects Effects
Measure:	MEASURE_1
Transformed Variable:	Average
Source	Type III Sum of Squares	df	Mean Square	F	Sig.	Partial Eta Squared	Noncent. Parameter	Observed Powera
Intercept	5.04496e+08	1	5.04496e+08	975.809	4.35339e-26	0.967288	975.809	1
genotype	3.09159e+06	1	3.09159e+06	5.97982	0.0199732	0.153408	5.97982	0.660489
Error	1.70611e+07	33	517003
Amphetamine Sensitization - Figure 6 Suppl 3B
Habituation/Saline 1 DAY 1					Habituation/Saline 2 DAY 2					AMPH 1 DAY 3					AMPH 2 DAY 4					AMPH 3 DAY 5					AMPH 4 DAY 6					AMPH 5 DAY 7					Amphetamine Challenge 1 DAY 19					Amphetamine Challenge 2 DAY 23
VEHICLE (to be AMPHETAMINE 2.5 mg/kg)					VEHICLE (to be AMPHETAMINE 2.5 mg/kg)					VEHICLE (to be AMPHETAMINE 2.5 mg/kg)					VEHICLE (to be AMPHETAMINE 2.5 mg/kg)					VEHICLE (to be AMPHETAMINE 2.5 mg/kg)					VEHICLE (to be AMPHETAMINE 2.5 mg/kg)					VEHICLE (to be AMPHETAMINE 2.5 mg/kg)					VEHICLE (to be AMPHETAMINE 2.5 mg/kg)					VEHICLE (to be AMPHETAMINE 2.5 mg/kg)
Mouse ID	Genotype	Drug treatment	Total Locomotion counts (90 min)		Mouse ID	Genotype	Drug treatment	Total Locomotion counts (90 min)		Mouse ID	Genotype	Drug treatment	Total Locomotion counts (90 min)		Mouse ID	Genotype	Drug treatment	Total Locomotion counts (90 min)		Mouse ID	Genotype	Drug treatment	Total Locomotion counts (90 min)		Mouse ID	Genotype	Drug treatment	Total Locomotion counts (90 min)		Mouse ID	Genotype	Drug treatment	Total Locomotion counts (90 min)		Mouse ID	Genotype	Drug treatment	Total Locomotion counts (90 min)		Mouse ID	Genotype	Drug treatment	Total Locomotion counts (90 min)
3026	CTRL	AMPH	6212		3026	CTRL	AMPH	2548		3026	CTRL	AMPH	21785		3026	CTRL	AMPH	30192		3026	CTRL	AMPH	33409		3026	CTRL	AMPH	36356		3026	CTRL	AMPH	36495		3026	CTRL	AMPH	35548		3026	CTRL	AMPH	33959
3036	CTRL	AMPH	2886		3036	CTRL	AMPH	3641		3036	CTRL	AMPH	26721		3036	CTRL	AMPH	29222		3036	CTRL	AMPH	34183		3036	CTRL	AMPH	32899		3036	CTRL	AMPH	33131		3036	CTRL	AMPH	33828		3036	CTRL	AMPH	28860
3037	CTRL	AMPH	4654		3037	CTRL	AMPH	8926		3037	CTRL	AMPH	30643		3037	CTRL	AMPH	33495		3037	CTRL	AMPH	38471		3037	CTRL	AMPH	36715		3037	CTRL	AMPH	32820		3037	CTRL	AMPH	32768		3037	CTRL	AMPH	29431
3041	CTRL	AMPH	7615		3041	CTRL	AMPH	5034		3041	CTRL	AMPH	29543		3041	CTRL	AMPH	24696		3041	CTRL	AMPH	33382		3041	CTRL	AMPH	35224		3041	CTRL	AMPH	35684		3041	CTRL	AMPH	38598		3041	CTRL	AMPH	32665
3077	CTRL	AMPH	7071		3077	CTRL	AMPH	2318		3077	CTRL	AMPH	20452		3077	CTRL	AMPH	18661		3077	CTRL	AMPH	29133		3077	CTRL	AMPH	28365		3077	CTRL	AMPH	28382		3077	CTRL	AMPH	26629		3077	CTRL	AMPH	24476
3078	CTRL	AMPH	2640		3078	CTRL	AMPH	1207		3078	CTRL	AMPH	34418		3078	CTRL	AMPH	26872		3078	CTRL	AMPH	39461		3078	CTRL	AMPH	32181		3078	CTRL	AMPH	37522		3078	CTRL	AMPH	35946		3078	CTRL	AMPH	16024
3081	CTRL	AMPH	7279		3081	CTRL	AMPH	3572		3081	CTRL	AMPH	22173		3081	CTRL	AMPH	29349		3081	CTRL	AMPH	39759		3081	CTRL	AMPH	33391		3081	CTRL	AMPH	37034		3081	CTRL	AMPH	33298		3081	CTRL	AMPH	24389
3086	CTRL	AMPH	6631		3086	CTRL	AMPH	3132		3086	CTRL	AMPH	26758		3086	CTRL	AMPH	16193		3086	CTRL	AMPH	26148		3086	CTRL	AMPH	26182		3086	CTRL	AMPH	29890		3086	CTRL	AMPH	20195		3086	CTRL	AMPH	18727
3955	CTRL	AMPH	9471		3955	CTRL	AMPH	7959		3955	CTRL	AMPH	34141		3955	CTRL	AMPH	41524		3955	CTRL	AMPH	39421		3955	CTRL	AMPH	37739		3955	CTRL	AMPH	35859		3955	CTRL	AMPH	35825		3955	CTRL	AMPH	30686
3958	CTRL	AMPH	7082		3958	CTRL	AMPH	7756		3958	CTRL	AMPH	31534		3958	CTRL	AMPH	36618		3958	CTRL	AMPH	36356		3958	CTRL	AMPH	35926		3958	CTRL	AMPH	38414		3958	CTRL	AMPH	43349		3958	CTRL	AMPH	37667
3981	CTRL	AMPH	5160		3981	CTRL	AMPH	7166		3981	CTRL	AMPH	34332		3981	CTRL	AMPH	36145		3981	CTRL	AMPH	36418		3981	CTRL	AMPH	31831		3981	CTRL	AMPH	32345		3981	CTRL	AMPH	32331		3981	CTRL	AMPH	30054
	CTRL	AVG	6063.73			CTRL	AVG	4841.73			CTRL	AVG	28409.1			CTRL	AVG	29360.6			CTRL	AVG	35103.7			CTRL	AVG	33346.3			CTRL	AVG	34325.1			CTRL	AVG	33483.2			CTRL	AVG	27903.5
	n=11	SEM	652.012			n=11	SEM	843.502			n=11	SEM	1648.46			n=11	SEM	2408.88			n=11	SEM	1401.67			n=11	SEM	1139.65			n=11	SEM	1028.53			n=11	SEM	1821.23			n=11	SEM	1953.35
3028	HET	AMPH	6501		3028	HET	AMPH	1253		3028	HET	AMPH	20564		3028	HET	AMPH	23137		3028	HET	AMPH	29112		3028	HET	AMPH	29641		3028	HET	AMPH	31780		3028	HET	AMPH	27198		3028	HET	AMPH	21648
3038	HET	AMPH	8331		3038	HET	AMPH	5275		3038	HET	AMPH	25865		3038	HET	AMPH	29942		3038	HET	AMPH	31810		3038	HET	AMPH	31987		3038	HET	AMPH	20835		3038	HET	AMPH	31336		3038	HET	AMPH	31658
3087	HET	AMPH	4692		3087	HET	AMPH	2752		3087	HET	AMPH	17120		3087	HET	AMPH	21135		3087	HET	AMPH	25663		3087	HET	AMPH	30226		3087	HET	AMPH	31147		3087	HET	AMPH	30022		3087	HET	AMPH	21431
3089	HET	AMPH	1219		3089	HET	AMPH	635		3089	HET	AMPH	7849		3089	HET	AMPH	11545		3089	HET	AMPH	17760		3089	HET	AMPH	21305		3089	HET	AMPH	14235		3089	HET	AMPH	19769		3089	HET	AMPH	6514
3090	HET	AMPH	1648		3090	HET	AMPH	1145		3090	HET	AMPH	6959		3090	HET	AMPH	13415		3090	HET	AMPH	20553		3090	HET	AMPH	13677		3090	HET	AMPH	15728		3090	HET	AMPH	21546		3090	HET	AMPH	16519
3952	HET	AMPH	2771		3952	HET	AMPH	2931		3952	HET	AMPH	15388		3952	HET	AMPH	23302		3952	HET	AMPH	22591		3952	HET	AMPH	20290		3952	HET	AMPH	25514		3952	HET	AMPH	16806		3952	HET	AMPH	22116
3956	HET	AMPH	2143		3956	HET	AMPH	4931		3956	HET	AMPH	27940		3956	HET	AMPH	26952		3956	HET	AMPH	26954		3956	HET	AMPH	27531		3956	HET	AMPH	29945		3956	HET	AMPH	26558		3956	HET	AMPH	22669
3961	HET	AMPH	2416		3961	HET	AMPH	1848		3961	HET	AMPH	13369		3961	HET	AMPH	13364		3961	HET	AMPH	18259		3961	HET	AMPH	22306		3961	HET	AMPH	22407		3961	HET	AMPH	17780		3961	HET	AMPH	17296
3963	HET	AMPH	4577		3963	HET	AMPH	3710		3963	HET	AMPH	20867		3963	HET	AMPH	31877		3963	HET	AMPH	30906		3963	HET	AMPH	16063		3963	HET	AMPH	32121		3963	HET	AMPH	31400		3963	HET	AMPH	30093
3998	HET	AMPH	4447		3998	HET	AMPH	3266		3998	HET	AMPH	14760		3998	HET	AMPH	11560		3998	HET	AMPH	9045		3998	HET	AMPH	9822		3998	HET	AMPH	11441		3998	HET	AMPH	17401		3998	HET	AMPH	21867
	cHET	AVG	3874.5			cHET	AVG	2774.6			cHET	AVG	17068.1			cHET	AVG	20622.9			cHET	AVG	23265.3			cHET	AVG	22284.8			cHET	AVG	23515.3			cHET	AVG	23981.6			cHET	AVG	21181.1
	n=10	SEM	758.495			n=10	SEM	526.47			n=10	SEM	2307.42			n=10	SEM	2573.63			n=10	SEM	2357.89			n=10	SEM	2513.91			n=10	SEM	2598.45			n=10	SEM	1884.21			n=10	SEM	2223.56
VEHICLE					VEHICLE					VEHICLE					VEHICLE					VEHICLE					VEHICLE					VEHICLE					VEHICLE					VEHICLE
Mouse ID	Genotype	Drug treatment	Total Locomotion counts (90 min)		Mouse ID	Genotype	Drug treatment	Total Locomotion counts (90 min)		Mouse ID	Genotype	Drug treatment	Total Locomotion counts (90 min)		Mouse ID	Genotype	Drug treatment	Total Locomotion counts (90 min)		Mouse ID	Genotype	Drug treatment	Total Locomotion counts (90 min)		Mouse ID	Genotype	Drug treatment	Total Locomotion counts (90 min)		Mouse ID	Genotype	Drug treatment	Total Locomotion counts (90 min)		Mouse ID	Genotype	Drug treatment	Total Locomotion counts (90 min)		Mouse ID	Genotype	Drug treatment	Total Locomotion counts (90 min)
3023	CTRL	SAL	6039		3023	CTRL	SAL	4992		3023	CTRL	SAL	2723		3023	CTRL	SAL	2625		3023	CTRL	SAL	1688		3023	CTRL	SAL	1496		3023	CTRL	SAL	2302		3023	CTRL	SAL	24382		3023	CTRL	SAL	9396
3035	CTRL	SAL	8979		3035	CTRL	SAL	5967		3035	CTRL	SAL	3051		3035	CTRL	SAL	6747		3035	CTRL	SAL	1979		3035	CTRL	SAL	3014		3035	CTRL	SAL	2685		3035	CTRL	SAL	31425		3035	CTRL	SAL	19259
3040	CTRL	SAL	6351		3040	CTRL	SAL	5693		3040	CTRL	SAL	4500		3040	CTRL	SAL	6569		3040	CTRL	SAL	4496		3040	CTRL	SAL	2630		3040	CTRL	SAL	2326		3040	CTRL	SAL	27499		3040	CTRL	SAL	21465
3079	CTRL	SAL	6323		3079	CTRL	SAL	3624		3079	CTRL	SAL	3086		3079	CTRL	SAL	4003		3079	CTRL	SAL	4360		3079	CTRL	SAL	2466		3079	CTRL	SAL	1926		3079	CTRL	SAL	25300		3079	CTRL	SAL	17804
3962	CTRL	SAL	5447		3962	CTRL	SAL	6120		3962	CTRL	SAL	3634		3962	CTRL	SAL	6056		3962	CTRL	SAL	3032		3962	CTRL	SAL	4292		3962	CTRL	SAL	3882		3962	CTRL	SAL	25761		3962	CTRL	SAL	22601
3964	CTRL	SAL	9269		3964	CTRL	SAL	5155		3964	CTRL	SAL	2655		3964	CTRL	SAL	6963		3964	CTRL	SAL	3999		3964	CTRL	SAL	4804		3964	CTRL	SAL	1937		3964	CTRL	SAL	20778		3964	CTRL	SAL	18156
3982	CTRL	SAL	6481		3982	CTRL	SAL	8393		3982	CTRL	SAL	5276		3982	CTRL	SAL	4959		3982	CTRL	SAL	5919		3982	CTRL	SAL	6802		3982	CTRL	SAL	5365		3982	CTRL	SAL	31117		3982	CTRL	SAL	16415
	CTRL	AVG	6984.14			CTRL	AVG	5706.29			CTRL	AVG	3560.71			CTRL	AVG	5417.43			CTRL	AVG	3639			CTRL	AVG	3643.43			CTRL	AVG	2917.57			CTRL	AVG	26608.9			CTRL	AVG	17870.9
	n=7	SEM	613.443			n=7	SEM	591.79			n=7	SEM	402.667			n=7	SEM	664.556			n=7	SEM	612.661			n=7	SEM	729.634			n=7	SEM	517.68			n=7	SEM	1542.91			n=7	SEM	1757.9
3030	HET	SAL	3192		3030	HET	SAL	1732		3030	HET	SAL	1939		3030	HET	SAL	2502		3030	HET	SAL	1868		3030	HET	SAL	2024		3030	HET	SAL	1146		3030	HET	SAL	27996		3030	HET	SAL	19083
3039	HET	SAL	1919		3039	HET	SAL	1478		3039	HET	SAL	1753		3039	HET	SAL	2989		3039	HET	SAL	2877		3039	HET	SAL	1640		3039	HET	SAL	2085		3039	HET	SAL	31550		3039	HET	SAL	25818
3953	HET	SAL	2157		3953	HET	SAL	3119		3953	HET	SAL	2409		3953	HET	SAL	4058		3953	HET	SAL	7175		3953	HET	SAL	5144		3953	HET	SAL	2770		3953	HET	SAL	17940		3953	HET	SAL	25899
3954	HET	SAL	1792		3954	HET	SAL	3307		3954	HET	SAL	2302		3954	HET	SAL	2995		3954	HET	SAL	2715		3954	HET	SAL	2173		3954	HET	SAL	837		3954	HET	SAL	22429		3954	HET	SAL	11851
3957	HET	SAL	4955		3957	HET	SAL	4011		3957	HET	SAL	2788		3957	HET	SAL	3959		3957	HET	SAL	4544		3957	HET	SAL	2887		3957	HET	SAL	2711		3957	HET	SAL	24066		3957	HET	SAL	14128
3959	HET	SAL	7879		3959	HET	SAL	6107		3959	HET	SAL	4510		3959	HET	SAL	15924		3959	HET	SAL	15856		3959	HET	SAL	12061		3959	HET	SAL	4247		3959	HET	SAL	13341		3959	HET	SAL	18831
3997	HET	SAL	4533		3997	HET	SAL	5086		3997	HET	SAL	3748		3997	HET	SAL	4070		3997	HET	SAL	2984		3997	HET	SAL	2845		3997	HET	SAL	4121		3997	HET	SAL	26328		3997	HET	SAL	23067
	cHET	AVG	3775.29			cHET	AVG	3548.57			cHET	AVG	2778.43			cHET	AVG	5213.86			cHET	AVG	5431.29			cHET	AVG	4110.57			cHET	AVG	2559.57			cHET	AVG	23378.6			cHET	AVG	19811
	n=7	SEM	833.018			n=7	SEM	635.332			n=7	SEM	355.261			n=7	SEM	1944.75			n=7	SEM	1858.64			n=7	SEM	1505.43			n=7	SEM	541.175			n=7	SEM	2332.47			n=7	SEM	2075.35
STATISTICS
Figure 6—figure supplement 3B (deltaGLS1 mice Amph Sensitization) - RM ANOVA
Habituation (VEH) 2 Days												Sensitization 5 Days												Sensitization DAY3 AMPH1											Sensitization DAY4 AMPH2											Sensitization DAY5 AMPH3
Tests of Within-Subjects Effects												Tests of Within-Subjects Effects												Tests of Between-Subjects Effects											Tests of Between-Subjects Effects											Tests of Between-Subjects Effects
Measure:	MEASURE_1											Measure:	MEASURE_1											Dependent Variable:	AMPH1										Dependent Variable:	AMPH2										Dependent Variable:	AMPH3
Source		Type III Sum of Squares	df	Mean Square	F	Sig.	Partial Eta Squared	Noncent. Parameter	Observed Powera			Source		Type III Sum of Squares	df	Mean Square	F	Sig.	Partial Eta Squared	Noncent. Parameter	Observed Powera			Source	Type III Sum of Squares	df	Mean Square	F	Sig.	Partial Eta Squared	Noncent. Parameter	Observed Powerb			Source	Type III Sum of Squares	df	Mean Square	F	Sig.	Partial Eta Squared	Noncent. Parameter	Observed Powerb			Source	Type III Sum of Squares	df	Mean Square
days	Sphericity Assumed	1.536e+07	1	1.536e+07	6.09309	0.0192893	0.164265	6.09309	0.666933			days	Sphericity Assumed	2.86426e+08	4	7.16066e+07	7.0754	3.6485e-05	0.185826	28.3016	0.994011			Corrected Model	3981993231.048a	3	1.32733e+09	57.557	8.95571e-13	0.847794	172.671	1			Corrected Model	3721256038.269a	3	1.24042e+09	30.3059	2.40269e-09	0.74573	90.9176	1			Corrected Model	5966513183.832a	3	1.98884e+09
	Greenhouse-Geisser	1.536e+07	1	1.536e+07	6.09309	0.0192893	0.164265	6.09309	0.666933				Greenhouse-Geisser	2.86426e+08	3.43131	8.34744e+07	7.0754	0.000107781	0.185826	24.2779	0.987097			Intercept	5.63324e+09	1	5.63324e+09	244.274	2.99775e-16	0.887385	244.274	1			Intercept	7.70872e+09	1	7.70872e+09	188.339	1.02922e-14	0.858666	188.339	1			Intercept	9.54225e+09	1	9.54225e+09
	Huynh-Feldt	1.536e+07	1	1.536e+07	6.09309	0.0192893	0.164265	6.09309	0.666933				Huynh-Feldt	2.86426e+08	4	7.16066e+07	7.0754	3.6485e-05	0.185826	28.3016	0.994011			genotype	3.08365e+08	1	3.08365e+08	13.3716	0.000938819	0.301355	13.3716	0.943095			genotype	1.67736e+08	1	1.67736e+08	4.09812	0.0516199	0.116762	4.09812	0.50066			genotype	2.1175e+08	1	2.1175e+08
	Lower-bound	1.536e+07	1	1.536e+07	6.09309	0.0192893	0.164265	6.09309	0.666933				Lower-bound	2.86426e+08	1	2.86426e+08	7.0754	0.0122603	0.185826	7.0754	0.731336			treatment	3.21383e+09	1	3.21383e+09	139.361	5.2887e-13	0.818034	139.361	1			treatment	3.24911e+09	1	3.24911e+09	79.382	4.68299e-10	0.719157	79.382	1			treatment	5.09913e+09	1	5.09913e+09
days * genotype	Sphericity Assumed	1.44401e+06	1	1.44401e+06	0.572817	0.454856	0.0181427	0.572817	0.11357			days * genotype	Sphericity Assumed	1.1954e+07	4	2.98851e+06	0.295293	0.880559	0.00943569	1.18117	0.114009			genotype * treatment	2.33908e+08	1	2.33908e+08	10.143	0.00329223	0.24653	10.143	0.869654			genotype * treatment	1.52808e+08	1	1.52808e+08	3.7334	0.0625177	0.107487	3.7334	0.465114			genotype * treatment	3.89818e+08	1	3.89818e+08
	Greenhouse-Geisser	1.44401e+06	1	1.44401e+06	0.572817	0.454856	0.0181427	0.572817	0.11357				Greenhouse-Geisser	1.1954e+07	3.43131	3.48382e+06	0.295293	0.853854	0.00943569	1.01324	0.108966			Error	7.14896e+08	31	2.30612e+07								Error	1.26883e+09	31	4.093e+07								Error	8.05404e+08	31	2.59808e+07
	Huynh-Feldt	1.44401e+06	1	1.44401e+06	0.572817	0.454856	0.0181427	0.572817	0.11357				Huynh-Feldt	1.1954e+07	4	2.98851e+06	0.295293	0.880559	0.00943569	1.18117	0.114009			Total	12648725589	35									Total	15400116271	35									Total	20072322710	35
	Lower-bound	1.44401e+06	1	1.44401e+06	0.572817	0.454856	0.0181427	0.572817	0.11357				Lower-bound	1.1954e+07	1	1.1954e+07	0.295293	0.590735	0.00943569	0.295293	0.0823459			Corrected Total	4.69689e+09	34									Corrected Total	4.99009e+09	34									Corrected Total	6.77192e+09	34
days * treatment	Sphericity Assumed	700790	1	700790	0.277993	0.601773	0.00888781	0.277993	0.080423			days * treatment	Sphericity Assumed	3.05059e+08	4	7.62648e+07	7.53567	1.81549e-05	0.195551	30.1427	0.996245
	Greenhouse-Geisser	700790	1	700790	0.277993	0.601773	0.00888781	0.277993	0.080423				Greenhouse-Geisser	3.05059e+08	3.43131	8.89047e+07	7.53567	5.88096e-05	0.195551	25.8572	0.991297
	Huynh-Feldt	700790	1	700790	0.277993	0.601773	0.00888781	0.277993	0.080423				Huynh-Feldt	3.05059e+08	4	7.62648e+07	7.53567	1.81549e-05	0.195551	30.1427	0.996245
	Lower-bound	700790	1	700790	0.277993	0.601773	0.00888781	0.277993	0.080423				Lower-bound	3.05059e+08	1	3.05059e+08	7.53567	0.00997377	0.195551	7.53567	0.75781			Sensitization DAY3 AMPH1 - within drug treatment groups																						Sensitization DAY5 AMPH3 - within drug treatment groups
days * genotype * treatment	Sphericity Assumed	905454	1	905454	0.35918	0.553317	0.0114537	0.35918	0.0894729			days * genotype * treatment	Sphericity Assumed	2.88659e+07	4	7.21648e+06	0.713056	0.584515	0.0224846	2.85222	0.225272
	Greenhouse-Geisser	905454	1	905454	0.35918	0.553317	0.0114537	0.35918	0.0894729				Greenhouse-Geisser	2.88659e+07	3.43131	8.41252e+06	0.713056	0.564225	0.0224846	2.44671	0.209072			treatment = AMPH																						treatment = AMPH
	Huynh-Feldt	905454	1	905454	0.35918	0.553317	0.0114537	0.35918	0.0894729				Huynh-Feldt	2.88659e+07	4	7.21648e+06	0.713056	0.584515	0.0224846	2.85222	0.225272
	Lower-bound	905454	1	905454	0.35918	0.553317	0.0114537	0.35918	0.0894729				Lower-bound	2.88659e+07	1	2.88659e+07	0.713056	0.404901	0.0224846	0.713056	0.129569			Tests of Between-Subjects Effectsa																						Tests of Between-Subjects Effectsa
Error(days)	Sphericity Assumed	7.81477e+07	31	2.52089e+06								Error(days)	Sphericity Assumed	1.25494e+09	124	1.01205e+07								Dependent Variable:	AMPH1																					Dependent Variable:	AMPH3
	Greenhouse-Geisser	7.81477e+07	31	2.52089e+06									Greenhouse-Geisser	1.25494e+09	106.37	1.17978e+07								Source	Type III Sum of Squares	df	Mean Square	F	Sig.	Partial Eta Squared	Noncent. Parameter	Observed Powerc														Source	Type III Sum of Squares	df	Mean Square
	Huynh-Feldt	7.81477e+07	31	2.52089e+06									Huynh-Feldt	1.25494e+09	124	1.01205e+07								Corrected Model	673713725.143b	1	6.73714e+08	18.2085	0.000416424	0.489363	18.2085	0.981374														Corrected Model	734110458.671b	1	7.3411e+08
	Lower-bound	7.81477e+07	31	2.52089e+06									Lower-bound	1.25494e+09	31	4.0482e+07								Intercept	1.08333e+10	1	1.08333e+10	292.792	5.31642e-13	0.939062	292.792	1														Intercept	1.78459e+10	1	1.78459e+10
																								genotype	6.73714e+08	1	6.73714e+08	18.2085	0.000416424	0.489363	18.2085	0.981374														genotype	7.3411e+08	1	7.3411e+08
Tests of Between-Subjects Effects												Tests of Between-Subjects Effects												Error	7.03001e+08	19	3.7e+07																			Error	6.468e+08	19	3.40421e+07
Measure:	MEASURE_1											Measure:	MEASURE_1											Total	12494041943	21																				Total	19614530392	21
Transformed Variable:	Average											Transformed Variable:	Average											Corrected Total	1.37671e+09	20																				Corrected Total	1.38091e+09	20
Source	Type III Sum of Squares	df	Mean Square	F	Sig.	Partial Eta Squared	Noncent. Parameter	Observed Powera				Source	Type III Sum of Squares	df	Mean Square	F	Sig.	Partial Eta Squared	Noncent. Parameter	Observed Powera
Intercept	1.48064e+09	1	1.48064e+09	259.588	1.29119e-16	0.89332	259.588	1				Intercept	3.94387e+10	1	3.94387e+10	414.496	1.68449e-19	0.930415	414.496	1				treatment = SAL																						treatment = SAL
genotype	9.71424e+07	1	9.71424e+07	17.0311	0.000256423	0.354585	17.0311	0.979125				genotype	1.17306e+09	1	1.17306e+09	12.3287	0.00139054	0.284539	12.3287	0.925146
treatment	6.34702e+06	1	6.34702e+06	1.11277	0.299633	0.0346519	1.11277	0.175671				treatment	2.18191e+10	1	2.18191e+10	229.316	7.15118e-16	0.880914	229.316	1				Tests of Between-Subjects Effectsa																						Tests of Between-Subjects Effectsa
genotype * treatment	1.29304e+06	1	1.29304e+06	0.226697	0.637323	0.00725971	0.226697	0.0747403				genotype * treatment	1.25572e+09	1	1.25572e+09	13.1975	0.0010017	0.298602	13.1975	0.940406				Dependent Variable:	AMPH1																					Dependent Variable:	AMPH3
Error	1.76818e+08	31	5.70381e+06									Error	2.94961e+09	31	9.51486e+07									Source	Type III Sum of Squares	df	Mean Square	F	Sig.	Partial Eta Squared	Noncent. Parameter	Observed Powerc														Source	Type III Sum of Squares	df	Mean Square
																								Corrected Model	2141898.286b	1	2.1419e+06	2.16077	0.1673	0.152589	2.16077	0.272607														Corrected Model	11243008.286b	1	1.1243e+07
																								Intercept	1.40647e+08	1	1.40647e+08	141.886	5.25105e-08	0.92202	141.886	1														Intercept	2.87945e+08	1	2.87945e+08
																								genotype	2.1419e+06	1	2.1419e+06	2.16077	0.1673	0.152589	2.16077	0.272607														genotype	1.1243e+07	1	1.1243e+07
																								Error	1.18952e+07	12	991265																			Error	1.58604e+08	12	1.3217e+07
																								Total	154683646	14																				Total	457792318	14
																								Corrected Total	1.40371e+07	13																				Corrected Total	1.69847e+08	13
Figure 6—figure supplement 3B (deltaGLS1 mice Challenge DAYS) - one-way ANOVA
Challenge 1											Challenge 2
Tests of Between-Subjects Effects											Tests of Between-Subjects Effects
Dependent Variable:	CHALL1										Dependent Variable:	CHALL2
Source	Type III Sum of Squares	df	Mean Square	F	Sig.	Partial Eta Squared	Noncent. Parameter	Observed Powerb			Source	Type III Sum of Squares	df	Mean Square	F	Sig.	Partial Eta Squared	Noncent. Parameter	Observed Powerb
Corrected Model	641469093.278a	3	2.13823e+08	6.63797	0.00135972	0.391129	19.9139	0.953987			Corrected Model	538475281.687a	3	1.79492e+08	4.80988	0.00728112	0.317626	14.4296	0.862352
Intercept	2.42245e+10	1	2.42245e+10	752.032	2.65163e-23	0.96041	752.032	1			Intercept	1.57953e+10	1	1.57953e+10	423.27	1.24418e-19	0.931759	423.27	1
genotype	3.40102e+08	1	3.40102e+08	10.5582	0.00278298	0.254058	10.5582	0.882425			genotype	4.79824e+07	1	4.79824e+07	1.2858	0.265517	0.0398254	1.2858	0.195745
treatment	1.17306e+08	1	1.17306e+08	3.64168	0.0656482	0.105124	3.64168	0.455939			treatment	2.72797e+08	1	2.72797e+08	7.3102	0.01103	0.190816	7.3102	0.745125
genotype * treatment	8.25162e+07	1	8.25162e+07	2.56165	0.119627	0.0763268	2.56165	0.341513			genotype * treatment	1.57438e+08	1	1.57438e+08	4.21891	0.0484912	0.119791	4.21891	0.512094
Error	9.98575e+08	31	3.22121e+07								Error	1.15684e+09	31	3.73173e+07
Total	27864226973	35									Total	19190759976	35
Corrected Total	1.64004e+09	34									Corrected Total	1.69531e+09	34
											Challenge 2 within drug treatment groups											Challenge 2 within genotype groups
											treatment = AMPH											genotype = CTRL
											Tests of Between-Subjects Effectsa											Tests of Between-Subjects Effectsa
											Dependent Variable:	CHALL2										Dependent Variable:	CHALL2
											Source	Type III Sum of Squares	df	Mean Square	F	Sig.	Partial Eta Squared	Noncent. Parameter	Observed Powerc			Source	Type III Sum of Squares	df	Mean Square	F	Sig.	Partial Eta Squared	Noncent. Parameter	Observed Powerc
											Corrected Model	236709789.039b	1	2.3671e+08	5.20126	0.034285	0.214917	5.20126	0.581058			Corrected Model	430571212.193b	1	4.30571e+08	12.9749	0.00238876	0.447798	12.9749	0.922015
											Intercept	1.26201e+10	1	1.26201e+10	277.304	8.63959e-13	0.935877	277.304	1			Intercept	8.96317e+09	1	8.96317e+09	270.097	1.92764e-11	0.944075	270.097	1
											genotype	2.3671e+08	1	2.3671e+08	5.20126	0.034285	0.214917	5.20126	0.581058			treatment	4.30571e+08	1	4.30571e+08	12.9749	0.00238876	0.447798	12.9749	0.922015
											Error	8.64691e+08	19	4.55101e+07								Error	5.3096e+08	16	3.3185e+07
											Total	13915711827	21									Total	11331162970	18
											Corrected Total	1.1014e+09	20									Corrected Total	9.61531e+08	17
											treatment = SAL											genotype = HET
											Tests of Between-Subjects Effectsa											Tests of Between-Subjects Effectsa
											Dependent Variable:	CHALL2										Dependent Variable:	CHALL2
											Source	Type III Sum of Squares	df	Mean Square	F	Sig.	Partial Eta Squared	Noncent. Parameter	Observed Powerc			Source	Type III Sum of Squares	df	Mean Square	F	Sig.	Partial Eta Squared	Noncent. Parameter	Observed Powerc
											Corrected Model	13174540.071b	1	1.31745e+07	0.54115	0.47609	0.04315	0.54115	0.104155			Corrected Model	7729540.041b	1	7.72954e+06	0.185249	0.673021	0.0121993	0.185249	0.0688549
											Intercept	4.96973e+09	1	4.96973e+09	204.134	6.77111e-09	0.944479	204.134	1			Intercept	6.9191e+09	1	6.9191e+09	165.826	1.63838e-09	0.917047	165.826	1
											genotype	1.31745e+07	1	1.31745e+07	0.54115	0.47609	0.04315	0.54115	0.104155			treatment	7.72954e+06	1	7.72954e+06	0.185249	0.673021	0.0121993	0.185249	0.0688549
											Error	2.92145e+08	12	2.43454e+07								Error	6.25877e+08	15	4.17251e+07
											Total	5275048149	14									Total	7859597006	17
											Corrected Total	3.0532e+08	13									Corrected Total	6.33607e+08	16
														Corrected Total	13699.6	27
														During CS presentation within genotypes
														genotype = CTRL
														Tests of Between-Subjects Effectsa
														Dependent Variable:	freezingPERC
														Source	Type III Sum of Squares	df	Mean Square	F	Sig.	Partial Eta Squared	Noncent. Parameter	Observed Powerc
														Corrected Model	25.578b	1	25.5783	0.0640717	0.803852	0.0045557	0.0640717	0.0564182
														Intercept	32912.3	1	32912.3	82.4428	3.0457e-07	0.854836	82.4428	1			Partial Eta square	Power
														ToneExposure	25.5783	1	25.5783	0.0640717	0.803852	0.0045557	0.0640717	0.0564182		preexposure	0.0045557	0.0564182
														Error	5589	14	399.214
														Total	38526.9	16
														Corrected Total	5614.57	15
														genotype = HET
														Tests of Between-Subjects Effectsa
														Dependent Variable:	freezingPERC
														Source	Type III Sum of Squares	df	Mean Square	F	Sig.	Partial Eta Squared	Noncent. Parameter	Observed Powerc
														Corrected Model	4222.876b	1	4222.88	11.2587	0.0072987	0.529604	11.2587	0.855529
														Intercept	29265.6	1	29265.6	78.0254	4.89449e-06	0.886396	78.0254	1			Partial Eta square	Power
														ToneExposure	4222.88	1	4222.88	11.2587	0.0072987	0.529604	11.2587	0.855529		preexposure	0.529604	0.855529
														Error	3750.77	10	375.077
														Total	37239.2	12
														Corrected Total	7973.65	11
[truncated: 23 more columns]

## Sheet: Figure 6 - Supp 3C
deltaGLS1 HET Latent Inhibition
Tone Fear Conditioning - Day 3
mouse ID	Genotype	Training	Freezing (%) Pre-CS	Freezing (%) During CS		mouse ID	Genotype	Training	Freezing (%) Pre-CS	Freezing (%) During CS
3101	CTRL	NPE	13.22	22.05		3100	CTRL	PE	1.04	24.89
M9lostag	CTRL	NPE	7.73	57.68		3125	CTRL	PE	7.73	35.89
3092	CTRL	NPE	24.78	67.17		M15lostag	CTRL	PE	20.51	34.67
3218	CTRL	NPE	30.07	41.9		3215	CTRL	PE	23.15	57.57
3219	CTRL	NPE	3.7	19.2		3225	CTRL	PE	13.2	50.17
3246	CTRL	NPE	25.93	46.19		3237	CTRL	PE	51.63	37.56
3241	CTRL	NPE	36.05	92.99		3222	CTRL	PE	37.83	53.48
3300	CTRL	NPE	10.39	25.77		3249	CTRL	PE	18.84	58.49
		AVG	18.9838	46.6187				AVG	21.7412	44.09
n=	7	SEM	4.14755	8.97171		n=	7	SEM	5.76615	4.39453
mouse ID	Genotype	Training	Freezing (%) Pre-CS	Freezing (%) During CS		mouse ID	Genotype	Training	Freezing (%) Pre-CS	Freezing (%) During CS
3132	HET	NPE	16.34	73.05		3096	HET	PE	7.43	19.87
3128	HET	NPE	26.45	48.05		3124	HET	PE	12.78	25.43
3175	HET	NPE	1.19	51.7		3324	HET	PE	9.64	19.87
3176	HET	NPE	10.98	81.91		3221	HET	PE	9.2	29.6
3177	HET	NPE	25.22	77.91		3295	HET	PE	24.18	76.57
3251	HET	NPE	4.6	76.24		3223	HET	PE	1.48	12.41
		AVG	14.13	68.1433				AVG	10.785	30.625
n=	6	SEM	4.27333	5.91232		n=	6	SEM	3.08258	9.49054
STATISTICS
Figure 6—figure supplement 3C (deltaGLS1 mice latent inhibition) - two-way ANOVA 2(genotype) x 2 (treatment)
Pre-CS presentation										During CS presentation
Tests of Between-Subjects Effectsa
Dependent Variable:	freezingPERC									Tests of Between-Subjects Effectsa
Source	Type III Sum of Squares	df	Mean Square	F	Sig.	Partial Eta Squared	Noncent. Parameter	Observed Powerc		Dependent Variable:	freezingPERC
Corrected Model	492.478b	3	164.159	1.077	0.377557	0.118652	3.231	0.254227		Source	Type III Sum of Squares	df	Mean Square	F	Sig.	Partial Eta Squared	Noncent. Parameter	Observed Powerc
Intercept	7386.19	1	7386.19	48.4586	3.37435e-07	0.668776	48.4586	0.999999		Corrected Model	4359.809b	3	1453.27	3.7344	0.0246856	0.318244	11.2032	0.737837
genotype	428.496	1	428.496	2.81124	0.106586	0.104853	2.81124	0.363244		Intercept	61545.5	1	61545.5	158.151	4.70814e-12	0.868241	158.151	1
ToneExposure	0.591696	1	0.591696	0.00388194	0.950836	0.000161722	0.00388194	0.0504105		genotype	111.355	1	111.355	0.286143	0.597624	0.0117822	0.286143	0.0807538
genotype * ToneExposure	63.8409	1	63.8409	0.418841	0.523658	0.0171524	0.418841	0.0953113		ToneExposure	2749.32	1	2749.32	7.0648	0.013768	0.227421	7.0648	0.722562
Error	3658.14	24	152.423							genotype * ToneExposure	2098.75	1	2098.75	5.39307	0.0290212	0.183481	5.39307	0.605963
Total	12218.5	28								Error	9339.77	24	389.157
Corrected Total	4150.62	27								Total	75766.1	28
