# Supplementary material for: Dopamine neuron dependent behaviors mediated by glutamate cotransmission
Source: eLife. 2017 Jul 13;6:e27566. doi: 10.7554/eLife.27566 (PMC5599237; doi:10.7554/eLife.27566)
Supplement: Figure 6—figure supplement 4—source data 4. — DOI: http://dx.doi.org/10.7554/eLife.27566.031 [file elife-27566-fig6-figsupp4-data4.xlsx]

## Sheet: Figure 6 - Suppl 4C
EMX1 GLS1 cHET Protein Analysis (hippocampus)														Normalized to the AVG control levels of each plate
														mouseID	CTRLS	mouseID	HETS
PLATE 1							PLATE 2							a	1.09546	k	0.6127
mouseID	genotype	PAG/GAPDH	mouseID	genotype	PAG/GAPDH		mouseID	genotype	PAG/GAPDH	mouseID	genotype	PAG/GAPDH		b	1.00847	l	0.402701
a	CTRL	1.14284	k	cHET	0.639202		f	CTRL	0.287871	p	cHET	0.168288		c	0.982537	m	0.372899
b	CTRL	1.0521	l	cHET	0.420119		g	CTRL	0.339029	q	cHET	0.156856		d	1.08723	n	0.657498
c	CTRL	1.02504	m	cHET	0.389029		h	CTRL	0.285908	r	cHET	0.193506		e	0.826302	o	0.386857
d	CTRL	1.13425	n	cHET	0.685937		i	CTRL	0.400484	s	cHET	0.144653		f	0.860663	f	0.50314
e	CTRL	0.862042	o	cHET	0.403591		j	CTRL	0.43706	t	cHET	0.265342		g	1.01361	g	0.468962
	Avg	1.04325						CTRL	0.256501					h	0.854796	h	0.578536
								Avg	0.334475					i	1.19735	i	0.432478
														j	1.3067	j	0.793309
														AVG	1.02331	AVG	0.520908
														SEM	0.0515838	SEM	0.0457164
STATISTICS
Figure 6—figure supplement 4C (EMX1 GLS1 cHET protein levels in the Hipp) - one-way ANOVA genotype effect
Tests of Between-Subjects Effects
Dependent Variable:	protein
Source	Type III Sum of Squares	df	Mean Square	F	Sig.	Partial Eta Squared	Noncent. Parameter	Observed Powerb
Corrected Model	1.202a	1	1.2023	51.3798	8.22649e-07	0.730036	51.3798	0.999999
Intercept	12.1166	1	12.1166	517.799	3.01212e-15	0.964605	517.799	1
genotype	1.2023	1	1.2023	51.3798	8.22649e-07	0.730036	51.3798	0.999999
Error	0.444603	19	0.0234001
Total	14.1581	21
Corrected Total	1.6469	20
