# Supplementary material for: Dopamine neuron dependent behaviors mediated by glutamate cotransmission
Source: eLife. 2017 Jul 13;6:e27566. doi: 10.7554/eLife.27566 (PMC5599237; doi:10.7554/eLife.27566)
Supplement: Figure 6—figure supplement 5—source data 5. — DOI: http://dx.doi.org/10.7554/eLife.27566.033 [file elife-27566-fig6-figsupp5-data5.xlsx]

## Sheet: Figure 6 - Suppl5
EMX1 GLS1 cHET - Latent Inhibition - Clozapine effect
Tone Fear Conditioning - Day 3
mouse ID	Genotype	Training	Freezing (%) Pre-CS	Freezing (%) During CS		mouse ID	Genotype	Training	Freezing (%) Pre-CS	Freezing (%) During CS
1273	ctrl	NPE	7.86	51.09		4286	ctrl	PE20	34.03	23.21
4227	ctrl	NPE	12.95	26.41		4296	ctrl	PE20	15.43	27.27
4292	ctrl	NPE	61.16	60.33		4349	ctrl	PE20	19.58	38.03
4381	ctrl	NPE	22.85	79.58		4377	ctrl	PE20	59.79	37.34
4431	ctrl	NPE	21.81	34.45		4386	ctrl	PE20	6.08	18.59
		AVG	25.326	50.372				AVG	26.982	28.888
n=	5	SEM	9.38295	9.43523		n=	5	SEM	9.35727	3.84655
mouse ID	Genotype	Training	Freezing (%) Pre-CS	Freezing (%) During CS		mouse ID	Genotype	Training	Freezing (%) Pre-CS	Freezing (%) During CS
1267	chet	NPE	25.07	57.87		1271	chet	PE20	15.58	25.54
4222	chet	NPE	22.32	21.22		4298	chet	PE20	39.02	33.74
4352	chet	NPE	26.56	76.06		4299	chet	PE20	10.68	34.84
4353	chet	NPE	5.93	53.51		4333	chet	PE20	10.67	30.94
4419	chet	NPE	6.53	36.56		4348	chet	PE20	20.18	27.28
4430	chet	NPE	8.9	47.52		4372	chet	PE20	40.06	43.13
4469	chet	NPE	27	85.25		4374	chet	PE20	14.09	32.22
4471	chet	NPE	26.85	59.27		4452	chet	PE20	23.44	34.86
		AVG	18.645	54.6575		4482	chet	PE20	8.61	31.5
n=	8	SEM	3.42775	7.22522				AVG	20.2589	32.6722
						n=	9	SEM	3.96781	1.68537
deltaGLS1 HET - Latent Inhibition - Clozapine effect
Tone Fear Conditioning - Day 3
mouse ID	Genotype	Training	Freezing (%) Pre-CS	Freezing (%) During CS		mouse ID	Genotype	Training	Freezing (%) Pre-CS	Freezing (%) During CS
3095	CTRL	NPE	15.3	43.65		3093	CTRL	PE	1.19	25.11
3126	CTRL	NPE	20.51	79.97		3099	CTRL	PE	30.56	25.45
3127	CTRL	NPE	8.77	19.15		3131	CTRL	PE	4.61	10.47
3217	CTRL	NPE	14.54	26.49		3226	CTRL	PE	15.73	27.05
3240	CTRL	NPE	12.17	68.22		3238	CTRL	PE	18.55	41.57
3247	CTRL	NPE	2.37	58.26		3244	CTRL	PE	6.68	26.21
		AVG	12.2767	49.29		3239	CTRL	PE	12.31	42.68
n=	6	SEM	2.53312	9.72992				AVG	12.8043	28.3629
						n=	7	SEM	3.76901	4.15471
mouse ID	Genotype	Training	Freezing (%) Pre-CS	Freezing (%) During CS		mouse ID	Genotype	Training	Freezing (%) Pre-CS	Freezing (%) During CS
3130	HET	NPE	21.25	94.21		3161	HET	PE	8.17	19.81
3082	HET	NPE	11.42	39.4		3098	HET	PE	10.09	17.37
3162	HET	NPE	1.34	11.63		3097	HET	PE	10.1	23.15
3245	HET	NPE	14.52	52.25		3179	HET	PE	14.39	30.4
3242	HET	NPE	12.61	61.71		3216	HET	PE	17.36	55.87
3243	HET	NPE	23.59	51.42		3220	HET	PE	34.42	40.01
3248	HET	NPE	13.2	40.73		3296	HET	PE	13.95	41.62
		AVG	13.99	50.1929				AVG	15.4971	32.6043
n=	7	SEM	2.73559	9.47304		n=	7	SEM	3.3708	5.27221
DAT GLS1 cHET - Latent Inhibition - Clozapine effect
Tone Fear Conditioning - Day 3
mouse ID	Genotype	Training	Freezing (%) Pre-CS	Freezing (%) During CS		mouse ID	Genotype	Training	Freezing (%) Pre-CS	Freezing (%) During CS
3922	CTRL	NPE	7.57	15.3		0	CTRL	PE20	14.56	45.97
3742	CTRL	NPE	1.34	48.3		3151	CTRL	PE20	6.39	20.8
3329	CTRL	NPE	11.28	74.46		3272	CTRL	PE20	12.76	21.93
3930	CTRL	NPE	2.52	37.73		3333	CTRL	PE20	5.79	32.61
3067	CTRL	NPE	8.9	68.34		3229	CTRL	PE20	17.24	25.21
3060	CTRL	NPE	29.08	62.72		3376	CTRL	PE20	7.57	28.66
		AVG	10.115	51.1417		3373	CTRL	PE20	8.16	19.76
n=	6	SEM	4.09742	9.02987				AVG	10.3529	27.8486
						n=	7	SEM	1.69034	3.48061
mouse ID	Genotype	Training	Freezing (%) Pre-CS	Freezing (%) During CS		mouse ID	Genotype	Training	Freezing (%) Pre-CS	Freezing (%) During CS
3781	HET	NPE	25.22	30.77		3336	HET	PE20	3.56	41.29
3879	HET	NPE	26.11	21.94		3275	HET	PE20	5.79	12.13
3883	HET	NPE	2.37	54.96		3276	HET	PE20	37.54	20.37
3065	HET	NPE	15.73	63.22		3150	HET	PE20	27.19	34.2
3891	HET	NPE	6.08	26.32		3180	HET	PE20	24.78	45.66
3929	HET	NPE	13.95	32.83		3187	HET	PE20	22.26	37.56
3976	HET	NPE	29.67	36.78		3330	HET	PE20	22.4	51.92
3881	HET	NPE	28.04	61.86				AVG	20.5029	34.7329
		AVG	18.3962	41.085		n=	7	SEM	4.53424	5.3078
n=	8	SEM	3.68775	5.81207
STATISTICS
Figure 6—figure supplement 5 (Clozapine effects on latent inhibition) - ANOVA 2 (genotype) x 2 (preexposure)
EMX1 GLS1 cHET mice											deltaGLS1 HET mice											DAT GLS1 cHET mice
Tests of Between-Subjects Effectsa											Tests of Between-Subjects Effectsa											Tests of Between-Subjects Effectsa
Dependent Variable:	TonefreezPERC										Dependent Variable:	TonefreezPERC										Dependent Variable:	TonefreezPERC
Source	Type III Sum of Squares	df	Mean Square	F	Sig.	Partial Eta Squared	Noncent. Parameter	Observed Powerc			Source	Type III Sum of Squares	df	Mean Square	F	Sig.	Partial Eta Squared	Noncent. Parameter	Observed Powerc			Source	Type III Sum of Squares	df	Mean Square	F	Sig.	Partial Eta Squared	Noncent. Parameter	Observed Powerc
Corrected Model	3273.328b	3	1091.11	4.82206	0.00951462	0.386113	14.4662	0.846256			Corrected Model	2574.526b	3	858.175	2.32169	0.101766	0.23244	6.96507	0.509548			Corrected Model	1905.147b	3	635.049	2.52759	0.0813352	0.240092	7.58278	0.551152
Intercept	43627.8	1	43627.8	192.809	1.13984e-12	0.893424	192.809	1			Intercept	43250.3	1	43250.3	117.008	1.70244e-10	0.835724	117.008	1			Intercept	41507.3	1	41507.3	165.206	2.97643e-12	0.873154	165.206	1
genotype	102.373	1	102.373	0.452427	0.507887	0.0192913	0.452427	0.0988445			genotype	44.459	1	44.459	0.120278	0.731886	0.00520229	0.120278	0.062764			genotype	17.4304	1	17.4304	0.0693758	0.794496	0.00288233	0.0693758	0.0573658
preexposure	2970.52	1	2970.52	13.1279	0.00142641	0.363373	13.1279	0.934258			preexposure	2492.21	1	2492.21	6.74238	0.0161318	0.226693	6.74238	0.700929			preexposure	1522.11	1	1522.11	6.05825	0.0214142	0.20155	6.05825	0.656184
genotype * preexposure	0.395024	1	0.395024	0.00174577	0.967033	7.58975e-05	0.00174577	0.0501839			genotype * preexposure	18.7254	1	18.7254	0.0506592	0.823908	0.00219774	0.0506592	0.0553536			genotype * preexposure	497.065	1	497.065	1.9784	0.172377	0.0761554	1.9784	0.271591
Error	5204.32	23	226.275								Error	8501.58	23	369.634								Error	6029.91	24	251.246
Total	55570.4	27									Total	53786.3	27									Total	49100	28
Corrected Total	8477.64	26									Corrected Total	11076.1	26									Corrected Total	7935.06	27
