# Supplementary material for: Dopamine neuron dependent behaviors mediated by glutamate cotransmission
Source: eLife. 2017 Jul 13;6:e27566. doi: 10.7554/eLife.27566 (PMC5599237; doi:10.7554/eLife.27566)
Supplement: Figure 6—source data 1. — DOI: http://dx.doi.org/10.7554/eLife.27566.023 [file elife-27566-fig6-data1.xlsx]

## Sheet: Figure 6B & 6C 
Amphetamine Sensitization
Saline 1 DAY 1					Saline 2 DAY 2					Sensitization 1 DAY 3					Sensitization 2 DAY 4					Sensitization 3 DAY 5					Sensitization 4 DAY 6					Sensitization 5 DAY 7					Saline Challenge 11 DAY 18					Amphetamine Challenge 12 DAY 19
VEHICLE (AMPHETAMINE 2.5 mg/kg)					VEHICLE (AMPHETAMINE 2.5 mg/kg)					AMPHETAMINE 2.5 mg/kg					AMPHETAMINE 2.5 mg/kg					AMPHETAMINE 2.5 mg/kg					AMPHETAMINE 2.5 mg/kg					AMPHETAMINE 2.5 mg/kg					AMPHETAMINE 2.5 mg/kg					AMPHETAMINE 2.5 mg/kg
Mouse ID	Genotype	Treatment Group	SUM AFTER 1.5 HOUR		Mouse ID	Genotype	Treatment Group	SUM AFTER		Mouse ID	Genotype	Treatment Group	SUM AFTER		Mouse ID	Genotype	Treatment Group	SUM AFTER
3585	ctrl	amph	1601		3585	ctrl	amph	1226		3585	ctrl	amph	10479		3585	ctrl	amph	8943		Mouse ID	Genotype	Treatment Group	SUM AFTER		Mouse ID	Genotype	Treatment Group	SUM AFTER		Mouse ID	Genotype	Treatment Group	SUM AFTER							Mouse ID	Genotype	Treatment Group	SUM AFTER
3597	ctrl	amph	695		3597	ctrl	amph	678		3597	ctrl	amph	2905		3597	ctrl	amph	4142		3585	ctrl	amph	11121		3585	ctrl	amph	8286		3585	ctrl	amph	11482		Mouse ID	Genotype	Treatment Group	SUM AFTER		3585	ctrl	amph	8460
3623	ctrl	amph	780		3623	ctrl	amph	624		3623	ctrl	amph	2743		3623	ctrl	amph	3209		3597	ctrl	amph	8968		3597	ctrl	amph	6254		3597	ctrl	amph	9424		3585	ctrl	amph	1714		3597	ctrl	amph	7442
3688	ctrl	amph	1284		3688	ctrl	amph	952		3688	ctrl	amph	7821		3688	ctrl	amph	8716		3623	ctrl	amph	4419		3623	ctrl	amph	6552		3623	ctrl	amph	10963		3597	ctrl	amph	1134		3623	ctrl	amph	11355
3656	ctrl	amph	761		3656	ctrl	amph	613		3656	ctrl	amph	3665		3656	ctrl	amph	4198		3688	ctrl	amph	12037		3688	ctrl	amph	19110		3688	ctrl	amph	14711		3623	ctrl	amph	1090		3688	ctrl	amph	23665
3729	ctrl	amph	1933		3729	ctrl	amph	1388		3729	ctrl	amph	2349		3729	ctrl	amph	4552		3656	ctrl	amph	3643		3656	ctrl	amph	3210		3656	ctrl	amph	5326		3688	ctrl	amph	1177		3656	ctrl	amph	8461
3743	ctrl	amph	1449		3743	ctrl	amph	584		3743	ctrl	amph	2834		3743	ctrl	amph	3573		3729	ctrl	amph	5530		3729	ctrl	amph	5812		3729	ctrl	amph	5239		3656	ctrl	amph	861		3743	ctrl	amph	8189
3746	ctrl	amph	981		3746	ctrl	amph	639		3746	ctrl	amph	3282		3746	ctrl	amph	5919		3743	ctrl	amph	12895		3743	ctrl	amph	3272		3743	ctrl	amph	3393		3729	ctrl	amph	959		3746	ctrl	amph	16878
4701	ctrl	amph	1947		4701	ctrl	amph	1940		4701	ctrl	amph	6326		4701	ctrl	amph	5459		3746	ctrl	amph	3480		3746	ctrl	amph	9821		3746	ctrl	amph	6447		3743	ctrl	amph	712		4701	ctrl	amph	9649
3705	ctrl	amph	2456		3705	ctrl	amph	427		3705	ctrl	amph	2397		3705	ctrl	amph	2021		4701	ctrl	amph	10414		4701	ctrl	amph	11358		4701	ctrl	amph	7707		3746	ctrl	amph	439		3729	ctrl	amph	8453
3740	ctrl	amph	1114		3740	ctrl	amph	526		3740	ctrl	amph	2279		3740	ctrl	amph	2789		3705	ctrl	amph	4241		3705	ctrl	amph	4324		3705	ctrl	amph	5755		4701	ctrl	amph	1917		3705	ctrl	amph	5115
3757	ctrl	amph	1065		3757	ctrl	amph	682		3757	ctrl	amph	9798		3757	ctrl	amph	18433		3740	ctrl	amph	2441		3740	ctrl	amph	3257		3740	ctrl	amph	3165		3705	ctrl	amph	131		3740	ctrl	amph	5260
3803	ctrl	amph	4773		3803	ctrl	amph	572		3803	ctrl	amph	16503		3803	ctrl	amph	10762		3757	ctrl	amph	27032		3757	ctrl	amph	28396		3757	ctrl	amph	29281		3757	ctrl	amph	1102		3757	ctrl	amph	13953
3870	ctrl	amph	3316		3870	ctrl	amph	3682		3870	ctrl	amph	11693		3870	ctrl	amph	18543		3803	ctrl	amph	23112		3803	ctrl	amph	21292		3803	ctrl	amph	24438		3740	ctrl	amph	438		3803	ctrl	amph	16225
3908	ctrl	amph	3651		3908	ctrl	amph	1252		3908	ctrl	amph	2733		3908	ctrl	amph	3798		3870	ctrl	amph	29646		3870	ctrl	amph	30796		3870	ctrl	amph	28844		3803	ctrl	amph	712		3870	ctrl	amph	36146
3909	ctrl	amph	729		3909	ctrl	amph	887		3909	ctrl	amph	7387		3909	ctrl	amph	5970		3908	ctrl	amph	4229		3908	ctrl	amph	4549		3908	ctrl	amph	7308		3870	ctrl	amph	10129		3908	ctrl	amph	4845
3925	ctrl	amph	863		3925	ctrl	amph	410		3925	ctrl	amph	971		3925	ctrl	amph	4894		3909	ctrl	amph	9640		3909	ctrl	amph	9456		3909	ctrl	amph	6781		3908	ctrl	amph	1235		3909	ctrl	amph	4268
3975	ctrl	amph	1501		3975	ctrl	amph	789		3975	ctrl	amph	2290		3975	ctrl	amph	3251		3925	ctrl	amph	13546		3925	ctrl	amph	22047		3925	ctrl	amph	26028		3909	ctrl	amph	3689		3925	ctrl	amph	28308
3999	ctrl	amph	3248		3999	ctrl	amph	1763		3999	ctrl	amph	7119		3999	ctrl	amph	7697		3975	ctrl	amph	3110		3975	ctrl	amph	4358		3975	ctrl	amph	3685		3925	ctrl	amph	1037		3975	ctrl	amph	2895
3049	ctrl	amph	1013		3049	ctrl	amph	770		3049	ctrl	amph	2602		3049	ctrl	amph	1978		3999	ctrl	amph	7158		3999	ctrl	amph	8183		3999	ctrl	amph	16729		3975	ctrl	amph	2218		3999	ctrl	amph	12073
3092	ctrl	amph	514		3092	ctrl	amph	535		3092	ctrl	amph	775		3092	ctrl	amph	3045		3049	ctrl	amph	2613		3049	ctrl	amph	2541		3049	ctrl	amph	3193		3999	ctrl	amph	9106		3049	ctrl	amph	11626
	n=21	AVG	1698.76			n=21	AVG	997.095			n=21	AVG	5188.14			n=21	AVG	6280.57		3092	ctrl	amph	1924		3092	ctrl	amph	3682		3092	ctrl	amph	4251		3049	ctrl	amph	1274		3092	ctrl	amph	4514
	21	SEM	252.386				SEM	162.833				SEM	902.047				SEM	1022.72			n=21	AVG	9580.9			n=21	AVG	10312.2			n=21	AVG	11150		3092	ctrl	amph	1648			n=21	AVG	11799
																						SEM	1762.72				SEM	1891.4				SEM	1916.73			n=21	AVG	2034.38				SEM	1858.98
																																					SEM	574.941
3569	chet	amph	843		3569	chet	amph	1125		3569	chet	amph	5968		3569	chet	amph	2956
3554	chet	amph	2448		3554	chet	amph	793		3554	chet	amph	2466		3554	chet	amph	4162		3569	chet	amph	5962		3569	chet	amph	4818		3569	chet	amph	6246		3569	chet	amph	680		3569	chet	amph	3578
3582	chet	amph	1309		3582	chet	amph	927		3582	chet	amph	1618		3582	chet	amph	3482		3554	chet	amph	3867		3554	chet	amph	3685		3554	chet	amph	6075		3554	chet	amph	920		3554	chet	amph	3694
3596	chet	amph	799		3596	chet	amph	363		3596	chet	amph	4896		3596	chet	amph	4121		3582	chet	amph	4240		3582	chet	amph	4355		3582	chet	amph	3348		3582	chet	amph	3396		3582	chet	amph	5009
3600	chet	amph	697		3600	chet	amph	1029		3600	chet	amph	1935		3600	chet	amph	1738		3596	chet	amph	4933		3596	chet	amph	3866		3596	chet	amph	5478		3596	chet	amph	2082		3596	chet	amph	12216
3626	chet	amph	1384		3626	chet	amph	656		3626	chet	amph	2268		3626	chet	amph	3602		3600	chet	amph	1927		3600	chet	amph	1631		3600	chet	amph	2074		3600	chet	amph	743		3600	chet	amph	2267
3638	chet	amph	2973		3638	chet	amph	426		3638	chet	amph	3684		3638	chet	amph	4432		3626	chet	amph	3497		3626	chet	amph	6060		3626	chet	amph	6368		3626	chet	amph	1365		3626	chet	amph	7518
3649	chet	amph	774		3649	chet	amph	846		3649	chet	amph	6796		3649	chet	amph	3744		3638	chet	amph	3240		3638	chet	amph	2815		3638	chet	amph	3302		3638	chet	amph	465		3638	chet	amph	4858
3651	chet	amph	1351		3651	chet	amph	596		3651	chet	amph	3478		3651	chet	amph	3161		3649	chet	amph	6552		3649	chet	amph	4077		3649	chet	amph	3912		3649	chet	amph	396		3649	chet	amph	4793
3661	chet	amph	1014		3661	chet	amph	574		3661	chet	amph	3431		3661	chet	amph	3763		3651	chet	amph	4371		3651	chet	amph	4700		3651	chet	amph	4494		3651	chet	amph	496		3651	chet	amph	5062
3726	chet	amph	1254		3726	chet	amph	742		3726	chet	amph	8764		3726	chet	amph	11231		3661	chet	amph	1703		3661	chet	amph	2243		3661	chet	amph	1944		3661	chet	amph	723		3661	chet	amph	3217
3728	chet	amph	429		3728	chet	amph	467		3728	chet	amph	8895		3728	het	amph	4848		3726	chet	amph	8292		3726	chet	amph	5166		3726	chet	amph	3847		3726	chet	amph	1774		3726	chet	amph	12936
3741	chet	amph	478		3741	chet	amph	3286		3741	chet	amph	3728		3741	het	amph	3295		3728	chet	amph	5096		3728	chet	amph	5524		3728	chet	amph	5524		3728	chet	amph	1020		3728	chet	amph	6849
3744	chet	amph	4977		3744	chet	amph	2139		3744	chet	amph	7933		3744	het	amph	10282		3741	chet	amph	5995		3741	chet	amph	4145		3741	chet	amph	4917		3741	chet	amph	3703		3741	chet	amph	5207
3783	chet	amph	2184		3783	chet	amph	4065		3783	chet	amph	3771		3783	het	amph	3771		3744	chet	amph	13149		3744	chet	amph	11691		3744	chet	amph	5096		3744	chet	amph	2094		3744	chet	amph	10514
3898	chet	amph	884		3898	chet	amph	1141		3898	chet	amph	2511		3898	het	amph	6913		3783	chet	amph	3180		3783	chet	amph	3261		3783	chet	amph	4332		3783	chet	amph	553		3783	chet	amph	4975
3912	chet	amph	558		3912	chet	amph	944		3912	chet	amph	1206		3912	het	amph	3633		3898	chet	amph	9450		3898	chet	amph	11193		3898	chet	amph	8817		3898	chet	amph	1115		3898	chet	amph	13057
3915	chet	amph	791		3915	chet	amph	1134		3915	chet	amph	1490		3915	het	amph	1732		3912	chet	amph	6664		3912	chet	amph	7433		3912	chet	amph	9094		3912	chet	amph	1808		3912	chet	amph	8962
3046	chet	amph	3361		3046	chet	amph	1577		3046	chet	amph	4495		3046	het	amph	5070		3915	chet	amph	3661		3915	chet	amph	6634		3915	chet	amph	8318		3915	chet	amph	967		3915	chet	amph	12063
3079	chet	amph	524		3079	chet	amph	499		3079	chet	amph	3798		3079	het	amph	3379		3046	chet	amph	7757		3046	chet	amph	5203		3046	chet	amph	5940		3046	chet	amph	879		3046	chet	amph	13652
3093	chet	amph	2721		3093	chet	amph	1126		3093	chet	amph	3205		3093	het	amph	4040		3079	chet	amph	3341		3079	chet	amph	5080		3079	chet	amph	4457		3079	chet	amph	1652		3079	chet	amph	8992
	n=21	AVG	1512.05			n=21	AVG	1164.52			n=21	AVG	4111.24			n=21	AVG	4445.48		3093	chet	amph	6539		3093	chet	amph	4636		3093	chet	amph	6024		3093	chet	amph	12101		3093	chet	amph	5158
	21	SEM	257.988				SEM	204.863				SEM	506.421				SEM	516.017			n=21	AVG	5400.76			n=21	AVG	5153.14			n=21	AVG	5219.38			n=21	AVG	1853.9			n=21	AVG	7360.81
																						SEM	590.67				SEM	544.917				SEM	423.654				SEM	548.875				SEM	807.665
VEHICLE					VEHICLE					VEHICLE					VEHICLE					VEHICLE					VEHICLE					VEHICLE					VEHICLE					VEHICLE
Mouse ID	Genotype	Treatment Group	SUM AFTER		Mouse ID	Genotype	Treatment Group	SUM AFTER		Mouse ID	Genotype	Treatment Group	SUM AFTER		Mouse ID	Genotype	Treatment Group	SUM AFTER		Mouse ID	Genotype	Treatment Group	SUM AFTER		Mouse ID	Genotype	Treatment Group	SUM AFTER		Mouse ID	Genotype	Treatment Group	SUM AFTER		Mouse ID	Genotype	Treatment Group	SUM AFTER		Mouse ID	Genotype	Treatment Group	SUM AFTER
3553	ctrl	vehicle	3075		3553	ctrl	vehicle	2106		3553	ctrl	vehicle	1109		3553	ctrl	vehicle	1176		3553	ctrl	vehicle	588		3553	ctrl	vehicle	1082		3553	ctrl	vehicle	1047		3553	ctrl	saline	1259		3553	ctrl	saline	22421
3575	ctrl	vehicle	900		3575	ctrl	vehicle	645		3575	ctrl	vehicle	666		3575	ctrl	vehicle	469		3575	ctrl	vehicle	1078		3575	ctrl	vehicle	517		3575	ctrl	vehicle	680		3575	ctrl	saline	460		3575	ctrl	saline	3080
3628	ctrl	vehicle	522		3628	ctrl	vehicle	635		3628	ctrl	vehicle	542		3628	ctrl	vehicle	740		3628	ctrl	vehicle	1398		3628	ctrl	vehicle	946		3628	ctrl	vehicle	425		3628	ctrl	saline	625		3628	ctrl	saline	2076
3654	ctrl	vehicle	562		3654	ctrl	vehicle	508		3654	ctrl	vehicle	293		3654	ctrl	vehicle	438		3654	ctrl	vehicle	356		3654	ctrl	vehicle	346		3654	ctrl	vehicle	300		3654	ctrl	saline	341		3654	ctrl	saline	1142
3565	ctrl	vehicle	1900		3565	ctrl	vehicle	1311		3565	ctrl	vehicle	1645		3565	ctrl	vehicle	1494		3565	ctrl	vehicle	861		3565	ctrl	vehicle	1338		3565	ctrl	vehicle	898		3565	ctrl	saline	1358		3565	ctrl	saline	5649
3689	ctrl	vehicle	2320		3689	ctrl	vehicle	1547		3689	ctrl	vehicle	1126		3689	ctrl	vehicle	1257		3689	ctrl	vehicle	1445		3689	ctrl	vehicle	2960		3689	ctrl	vehicle	2960		3689	ctrl	saline	922		3689	ctrl	saline	13894
3720	ctrl	vehicle	1512		3720	ctrl	vehicle	1159		3720	ctrl	vehicle	609		3720	ctrl	vehicle	959		3720	ctrl	vehicle	423		3720	ctrl	vehicle	559		3720	ctrl	vehicle	319		3720	ctrl	saline	622		3736	ctrl	saline	1895
3736	ctrl	vehicle	3675		3736	ctrl	vehicle	992		3736	ctrl	vehicle	767		3736	ctrl	vehicle	1289		3736	ctrl	vehicle	738		3736	ctrl	vehicle	504		3736	ctrl	vehicle	1440		3736	ctrl	saline	1416		3720	ctrl	saline	538
3006	ctrl	vehicle	1882		3006	ctrl	vehicle	425		3006	ctrl	vehicle	1425		3006	ctrl	vehicle	1420		3006	ctrl	vehicle	1745		3006	ctrl	vehicle	1333		3006	ctrl	vehicle	1054		3006	ctrl	saline	2932		3006	ctrl	saline	7546
3662	ctrl	vehicle	8268		3662	ctrl	vehicle	1563		3662	ctrl	vehicle	1310		3662	ctrl	vehicle	1143		3662	ctrl	vehicle	963		3662	ctrl	vehicle	1730		3662	ctrl	vehicle	1331		3662	ctrl	saline	603		3662	ctrl	saline	3137
3742	ctrl	vehicle	1569		3742	ctrl	vehicle	2399		3742	ctrl	vehicle	1088		3742	ctrl	vehicle	1783		3742	ctrl	vehicle	2348		3742	ctrl	vehicle	452		3742	ctrl	vehicle	1235		3742	ctrl	saline	1897		3742	ctrl	saline	2265
3751	ctrl	vehicle	568		3751	ctrl	vehicle	597		3751	ctrl	vehicle	461		3751	ctrl	vehicle	506		3751	ctrl	vehicle	565		3751	ctrl	vehicle	404		3751	ctrl	vehicle	1174		3751	ctrl	saline	273		3751	ctrl	saline	794
3767	ctrl	vehicle	4027		3767	ctrl	vehicle	717		3767	ctrl	vehicle	606		3767	ctrl	vehicle	585		3767	ctrl	vehicle	1076		3767	ctrl	vehicle	45		3767	ctrl	vehicle	987		3767	ctrl	saline	401		3767	ctrl	saline	2856
3777	ctrl	vehicle	4835		3777	ctrl	vehicle	493		3777	ctrl	vehicle	735		3777	ctrl	vehicle	534		3777	ctrl	vehicle	987		3777	ctrl	vehicle	458		3777	ctrl	vehicle	1206		3777	ctrl	saline	496		3777	ctrl	saline	1580
3880	ctrl	vehicle	3681		3880	ctrl	vehicle	1161		3880	ctrl	vehicle	1005		3880	ctrl	vehicle	1588		3880	ctrl	vehicle	1071		3880	ctrl	vehicle	1649		3880	ctrl	vehicle	939		3880	ctrl	saline	840		3880	ctrl	saline	8570
3919	ctrl	vehicle	645		3919	ctrl	vehicle	1185		3919	ctrl	vehicle	777		3919	ctrl	vehicle	1450		3919	ctrl	vehicle	440		3919	ctrl	vehicle	684		3919	ctrl	vehicle	603		3919	ctrl	saline	797		3919	ctrl	saline	3670
3929	ctrl	vehicle	1811		3929	ctrl	vehicle	1287		3929	ctrl	vehicle	1011		3929	ctrl	vehicle	804		3929	ctrl	vehicle	493		3929	ctrl	vehicle	1737		3929	ctrl	vehicle	612		3929	ctrl	saline	538		3929	ctrl	saline	746
3931	ctrl	vehicle	3243		3931	ctrl	vehicle	847		3931	ctrl	vehicle	1000		3931	ctrl	vehicle	977		3931	ctrl	vehicle	858		3931	ctrl	vehicle	909		3931	ctrl	vehicle	1123		3931	ctrl	saline	1922		3931	ctrl	saline	6447
3091	ctrl	vehicle	768		3091	ctrl	vehicle	660		3091	ctrl	vehicle	542		3091	ctrl	vehicle	588		3091	ctrl	vehicle	805		3091	ctrl	vehicle	697		3091	ctrl	vehicle	548		3091	ctrl	saline	435		3091	ctrl	saline	1751
	n=19	AVG	2408.58			n=19	AVG	1065.11			n=19	AVG	879.842			n=19	AVG	1010.53			n=19	AVG	959.895			n=19	AVG	965.789			n=19	AVG	993.737			n=19	AVG	954.579			n=19	AVG	4739.84
	19	SEM	446.057				SEM	126.25				SEM	81.2528				SEM	98.0788				SEM	115.215				SEM	159.625				SEM	134.705				SEM	158.855				SEM	1250.82
																																			3560	chet	saline	637
3560	chet	vehicle	603		3560	chet	vehicle	770		3560	chet	vehicle	1847		3560	chet	vehicle	809		3560	chet	vehicle	1152		3560	chet	vehicle	1083		3560	chet	vehicle	1165		3559	chet	saline	1925		3560	chet	saline	7812
3559	chet	vehicle	1422		3559	chet	vehicle	1610		3559	chet	vehicle	1741		3559	chet	vehicle	1519		3559	chet	vehicle	1145		3559	chet	vehicle	1677		3559	chet	vehicle	1019		3578	chet	saline	1216		3559	chet	saline	2062
3578	chet	vehicle	1429		3578	chet	vehicle	892		3578	chet	vehicle	591		3578	chet	vehicle	588		3578	chet	vehicle	2006		3578	chet	vehicle	1384		3578	chet	vehicle	1255		3598	chet	saline	762		3578	chet	saline	4081
3598	chet	vehicle	843		3598	chet	vehicle	863		3598	chet	vehicle	417		3598	chet	vehicle	734		3598	chet	vehicle	694		3598	chet	vehicle	1249		3598	chet	vehicle	1302		3650	chet	saline	599		3598	chet	saline	2375
3650	chet	vehicle	3135		3650	chet	vehicle	290		3650	chet	vehicle	764		3650	chet	vehicle	549		3650	chet	vehicle	844		3650	chet	vehicle	267		3650	chet	vehicle	537		3652	chet	saline	2177		3650	chet	saline	3557
3652	chet	vehicle	2093		3652	chet	vehicle	804		3652	chet	vehicle	520		3652	chet	vehicle	979		3652	chet	vehicle	1779		3652	chet	vehicle	763		3652	chet	vehicle	745		3660	chet	saline	586		3652	chet	saline	5252
3660	chet	vehicle	1872		3660	chet	vehicle	548		3660	chet	vehicle	875		3660	chet	vehicle	652		3660	chet	vehicle	969		3660	chet	vehicle	799		3660	chet	vehicle	1073		3728	chet	saline	1052		3660	chet	saline	3919
3728	chet	vehicle	1511		3728	chet	vehicle	509		3728	chet	vehicle	1239		3728	chet	vehicle	896		3728	chet	vehicle	1409		3728	chet	vehicle	1067		3728	chet	vehicle	1415		3734	chet	saline	578		3728	chet	saline	10848
3734	chet	vehicle	1656		3734	chet	vehicle	1026		3734	chet	vehicle	2771		3734	chet	vehicle	1967		3734	chet	vehicle	1196		3734	chet	vehicle	2016		3734	chet	vehicle	1002		3735	chet	saline	856		3734	chet	saline	1974
3735	chet	vehicle	2119		3735	chet	vehicle	1342		3735	chet	vehicle	1338		3735	chet	vehicle	1021		3735	chet	vehicle	801		3735	chet	vehicle	676		3735	chet	vehicle	797		3747	chet	saline	981		3735	chet	saline	6431
3747	chet	vehicle	2437		3747	chet	vehicle	1840		3747	chet	vehicle	1125		3747	chet	vehicle	718		3747	chet	vehicle	1352		3747	chet	vehicle	2090		3747	chet	vehicle	1891		3755	chet	saline	507		3747	chet	saline	3016
3755	chet	vehicle	1305		3755	chet	vehicle	1383		3755	chet	vehicle	312		3755	chet	vehicle	482		3755	chet	vehicle	302		3755	chet	vehicle	437		3755	chet	vehicle	1016		3849	chet	saline	518		3755	chet	saline	3111
3849	chet	vehicle	1611		3849	chet	vehicle	1377		3849	chet	vehicle	896		3849	chet	vehicle	707		3849	chet	vehicle	728		3849	chet	vehicle	1336		3849	chet	vehicle	1015		3872	chet	saline	4003		3849	chet	saline	3518
3872	chet	vehicle	3330		3872	chet	vehicle	1025		3872	chet	vehicle	1204		3872	chet	vehicle	1493		3872	chet	vehicle	2054		3872	chet	vehicle	2339		3872	chet	vehicle	1452		3902	chet	saline	1823		3872	chet	saline	5257
3902	chet	vehicle	5172		3902	chet	vehicle	3906		3902	chet	vehicle	882		3902	chet	vehicle	798		3902	chet	vehicle	530		3902	chet	vehicle	517		3902	chet	vehicle	321		3914	chet	saline	512		3902	chet	saline	8524
3914	chet	vehicle	1813		3914	chet	vehicle	1116		3914	chet	vehicle	1367		3914	chet	vehicle	1084		3914	chet	vehicle	835		3914	chet	vehicle	833		3914	chet	vehicle	465		3089	chet	saline	568		3914	chet	saline	2863
3089	chet	vehicle	1248		3089	chet	vehicle	571		3089	chet	vehicle	6453		3089	chet	vehicle	1012		3089	chet	vehicle	573		3089	chet	vehicle	318		3089	chet	vehicle	450			n=17	AVG	1135.29		3089	chet	saline	8679
	n=17	AVG	1976.41			n=17	AVG	1168.94			n=17	AVG	1431.88			n=17	AVG	941.647			n=17	AVG	1080.53			n=17	AVG	1108.88			n=17	AVG	995.294				SEM	221.08			n=17	AVG	4898.76
	17	SEM	263.476				SEM	198.461				SEM	346.397				SEM	95.5729				SEM	123.423				SEM	153.224				SEM	100.184									SEM	644.848
Amphetamine Challenge 12 DAY 19
AMPHETAMINE 2.5 mg/kg							After i.p. injection
Mouse ID	Genotype	Treatment Group	SUM AFTER	Bin1	Bin2	Bin3	Bin4	Bin5	Bin6	Bin7	Bin8	Bin9	Bin10	Bin12
3585	ctrl	amph	8460	32	3	85	2073	1345	992	1301	583	438	795	544
3597	ctrl	amph	7442	104	272	3	1479	1821	1085	1085	584	439	122	681
3623	ctrl	amph	11355	2	234	8	1126	941	1066	1243	1056	772	1432	2029
3688	ctrl	amph	23665	150	94	164	2921	3297	2994	3071	2849	2236	2375	1767
3656	ctrl	amph	8461	197	120	49	1828	1508	1002	823	785	904	719	249
3743	ctrl	amph	8189	1057	855	578	1553	1009	807	683	625	875	828	883
3746	ctrl	amph	16878	199	433	70	1638	2288	2349	2217	2039	1856	1774	1400
4701	ctrl	amph	9649	48	334	66	917	2402	1891	1290	784	557	382	246
3729	ctrl	amph	8453	34	484	21	2340	1172	772	527	859	696	682	620
3705	ctrl	amph	5115	192	0	372	372	851	717	602	560	602	411	422
3740	ctrl	amph	5260	57	17	37	1030	514	591	759	383	732	442	240
3757	ctrl	amph	13953	322	1042	476	2000	1620	2069	1440	1422	1446	1483	1050
3803	ctrl	amph	16225	10	29	61	1741	1411	1410	1959	2103	2538	1956	1441
3870	ctrl	amph	36146	1112	1500	1851	3975	4299	4442	4589	4278	3679	3687	3618
3908	ctrl	amph	4845	0	0	0	547	557	509	378	574	573	503	594
3909	ctrl	amph	4268	442	539	581	836	508	378	407	444	400	397	486
3925	ctrl	amph	28308	38	192	230	2656	3485	4018	3532	3670	2908	2829	2551
3975	ctrl	amph	2895	191	443	567	882	508	234	239	234	241	307	138
3999	ctrl	amph	12073	1258	1107	1153	3143	1805	1153	820	682	543	1339	1275
3049	ctrl	amph	11626	64	15	161	800	731	705	964	1298	1500	2061	1636
3092	ctrl	amph	4514	20	143	11	523	603	617	721	760	446	236	279
	n=21	AVG	11799	263.286	374.095	311.619	1637.14	1555.95	1419.1	1364.29	1265.33	1161	1179.05	1054.71
		SEM	1858.98	84.2127	92.3769	100.057	209.342	233.621	253.489	247.034	242.955	208.215	210.97	194.476
3569	chet	amph	3578	94	24	11	429	611	459	289	449	270	456	365
3554	chet	amph	3694	70	254	142	1096	655	445	445	487	169	219	83
3582	chet	amph	5009	317	625	527	669	507	411	686	357	443	569	821
3596	chet	amph	12216	51	98	553	1847	2110	2311	2400	1659	845	172	110
3600	chet	amph	2267	8	17	82	583	299	314	245	222	111	211	139
3626	chet	amph	7518	21	0	9	1140	1036	860	787	993	821	745	538
3638	chet	amph	4858	116	40	61	1108	583	812	803	720	408	201	132
3649	chet	amph	4793	81	7	102	1045	755	762	429	484	164	782	201
3651	chet	amph	5062	28	0	2	748	728	838	863	567	346	321	180
3661	chet	amph	3217	61	93	8	603	355	382	376	513	374	305	189
3726	chet	amph	12936	7	11	17	2506	2766	2031	1854	873	512	705	977
3728	chet	amph	6849	28	23	104	1124	701	545	1249	973	854	709	383
3741	chet	amph	5207	0	2	80	80	437	1040	642	662	385	719	674
3744	chet	amph	10514	19	38	286	1655	1627	1584	1393	1415	1001	1123	122
3783	chet	amph	4975	48	8	414	414	885	983	926	560	379	269	347
3898	chet	amph	13057	0	60	376	2960	2388	2184	1802	1288	1027	715	136
3912	chet	amph	8962	73	0	4	935	870	812	951	1133	980	890	1359
3915	chet	amph	12063	31	0	0	820	1068	1547	1635	1692	1878	1465	796
3046	chet	amph	13652	2	7	333	821	2027	2161	2290	1730	1411	1391	833
3079	chet	amph	8992	162	12	153	1765	1061	885	885	782	563	545	1081
3093	chet	amph	5158	1314	1325	1135	1216	358	369	391	444	400	535	979
	n=21	AVG	7360.81	120.524	125.905	209.476	1122.1	1039.38	1035	1016.24	857.286	635.286	621.286	497.381
		SEM	807.665	61.7105	67.3406	60.5126	152.142	156.446	144.252	141.686	101.506	97.2348	81.192	85.5861
VEHICLE
Mouse ID	Genotype	Treatment Group	SUM AFTER	Bin1	Bin2	Bin3	Bin4	Bin5	Bin6	Bin7	Bin8	Bin9	Bin10	Bin12
3553	ctrl	saline	22421	357	263	249	877	3021	3643	3674	3907	3552	2331	636
3575	ctrl	saline	3080	4	3	120	289	181	214	338	323	341	323	418
3628	ctrl	saline	2076	7	2	0	295	215	285	285	205	281	228	85
3654	ctrl	saline	1142	5	1	3	226	141	160	103	161	116	119	48
3565	ctrl	saline	5649	199	19	43	257	369	740	1103	1424	1032	420	133
3689	ctrl	saline	13894	23	362	30	794	1315	1623	1546	1565	1971	1862	1318
3736	ctrl	saline	1895	395	449	302	182	159	153	152	120	313	326	346
3720	ctrl	saline	538	17	66	18	273	39	12	27	39	43	5	13
3006	ctrl	saline	7546	104	84	699	782	1055	1215	1200	833	508	539	962
3662	ctrl	saline	3137	302	28	57	417	571	552	463	356	168	166	288
3742	ctrl	saline	2265	0	26	286	250	276	169	329	278	384	525	9
3751	ctrl	saline	794	0	2	14	148	97	74	69	47	37	66	204
3767	ctrl	saline	2856	8	0	18	445	348	357	330	345	350	325	44
3777	ctrl	saline	1580	261	22	147	198	186	139	227	151	258	122	105
3880	ctrl	saline	8570	10	56	40	588	898	1003	926	1163	1366	727	935
3919	ctrl	saline	3670	77	1	1	554	813	583	581	511	297	96	163
3929	ctrl	saline	746	83	2	0	290	61	25	4	2	1	110	158
3931	ctrl	saline	6447	203	585	207	649	988	986	1391	785	504	391	349
3091	ctrl	saline	1751	242	261	19	228	308	222	225	207	208	229	12
	n=19	AVG	4739.84	120.895	117.474	118.579	407.474	581.105	639.737	682.789	653.789	617.368	468.947	327.684
		SEM	1250.82	31.0246	40.7113	39.8871	52.9045	161.535	196.334	199.308	210.285	198.746	139.435	86.0782
3560	chet	saline	7812	13	18	30	545	1102	1483	1587	1040	527	670	373
3559	chet	saline	2062	47	26	183	116	149	165	186	311	192	206	568
3578	chet	saline	4081	40	179	196	225	437	892	734	404	609	523	102
3598	chet	saline	2375	23	142	23	242	203	273	264	405	340	219	119
3650	chet	saline	3557	10	0	59	367	335	301	467	347	381	577	558
3652	chet	saline	5252	313	5	111	427	842	666	464	463	790	606	417
3660	chet	saline	3919	1029	842	549	449	682	706	406	358	343	719	59
3728	chet	saline	10848	64	185	61	860	1308	1782	1929	1238	981	714	1075
3734	chet	saline	1974	4	1	100	269	410	308	121	273	97	68	301
3735	chet	saline	6431	26	16	377	538	791	1030	836	689	718	649	553
3747	chet	saline	3016	126	4	221	326	432	411	344	235	665	345	96
3755	chet	saline	3111	0	0	66	133	157	166	304	342	340	462	621
3849	chet	saline	3518	2	0	318	714	503	496	323	141	484	576	134
3872	chet	saline	5257	651	922	846	607	383	749	549	368	577	459	651
3902	chet	saline	8524	203	3	61	61	1247	1783	1657	1233	764	586	564
3914	chet	saline	2863	5	9	8	445	404	406	340	256	318	258	248
3089	chet	saline	8679	965	582	403	403	1517	1599	1172	1368	914	673	529
	n=17	AVG	4898.76	207.118	172.588	212.471	395.706	641.294	777.412	687.235	557.118	531.765	488.824	409.882
		SEM	644.848	82.4506	73.7448	54.7445	52.3052	103.235	136.804	135.809	96.9892	61.0373	48.555	65.5038
STATISTICS
Figure 6A (Amphetamine sensitization) - Univariate Analysis of Variance - RM ANOVA
Habituation (VEH) Days												Amphetamine Injections (5 days)												Amphetamine Injections (5 days, AMPH treated group)												Amphetamine Injections (5 days, VEH treated group)												Amphetamine Injections (DAY 3, AMPH treated group)
Tests of Within-Subjects Effects												Tests of Within-Subjects Effects
Measure:	MEASURE_1											Measure:	MEASURE_1											Tests of Within-Subjects Effectsa												Tests of Within-Subjects Effectsa												Tests of Between-Subjects Effectsa
Source		Type III Sum of Squares	df	Mean Square	F	Sig.	Partial Eta Squared	Noncent. Parameter	Observed Powera			Source		Type III Sum of Squares	df	Mean Square	F	Sig.	Partial Eta Squared	Noncent. Parameter	Observed Powera			Measure:	MEASURE_1											Measure:	MEASURE_1											Dependent Variable:	amph3
days	Sphericity Assumed	2.47731e+07	1	2.47731e+07	27.5911	1.38876e-06	0.271589	27.5911	0.999367			days	Sphericity Assumed	1.82483e+08	4	4.56208e+07	10.4311	6.44436e-08	0.123545	41.7242	0.999874			Source		Type III Sum of Squares	df	Mean Square	F	Sig.	Partial Eta Squared	Noncent. Parameter	Observed Powerb			Source		Type III Sum of Squares	df	Mean Square	F	Sig.	Partial Eta Squared	Noncent. Parameter	Observed Powerb			Source	Type III Sum of Squares
	Greenhouse-Geisser	2.47731e+07	1	2.47731e+07	27.5911	1.38876e-06	0.271589	27.5911	0.999367				Greenhouse-Geisser	1.82483e+08	2.07774	8.78275e+07	10.4311	4.42585e-05	0.123545	21.6731	0.988995			days	Sphericity Assumed	4.15218e+08	4	1.03805e+08	13.3168	2.1753e-09	0.249767	53.2671	0.999995			days	Sphericity Assumed	715099	4	178775	0.51328	0.726068	0.014872	2.05312	0.170304			Corrected Model	183472740.214b
	Huynh-Feldt	2.47731e+07	1	2.47731e+07	27.5911	1.38876e-06	0.271589	27.5911	0.999367				Huynh-Feldt	1.82483e+08	2.22551	8.19959e+07	10.4311	2.66614e-05	0.123545	23.2145	0.992091				Greenhouse-Geisser	4.15218e+08	2.05419	2.02132e+08	13.3168	8.08071e-06	0.249767	27.3552	0.997527				Greenhouse-Geisser	715099	2.01274	355285	0.51328	0.60197	0.014872	1.0331	0.131429			Intercept	2.35673e+09
	Lower-bound	2.47731e+07	1	2.47731e+07	27.5911	1.38876e-06	0.271589	27.5911	0.999367				Lower-bound	1.82483e+08	1	1.82483e+08	10.4311	0.0018493	0.123545	10.4311	0.890194				Huynh-Feldt	4.15218e+08	2.22095	1.86955e+08	13.3168	3.9713e-06	0.249767	29.576	0.99852				Huynh-Feldt	715099	2.20271	324644	0.51328	0.61819	0.014872	1.13061	0.135482			genotype	1.83473e+08
days * genotype	Sphericity Assumed	1.91675e+06	1	1.91675e+06	2.13479	0.148224	0.0280396	2.13479	0.302628			days * genotype	Sphericity Assumed	9.63232e+07	4	2.40808e+07	5.50601	0.000274305	0.0692527	22.024	0.975801				Lower-bound	4.15218e+08	1	4.15218e+08	13.3168	0.000752238	0.249767	13.3168	0.945236				Lower-bound	715099	1	715099	0.51328	0.478615	0.014872	0.51328	0.107139			Error	1.45155e+09
	Greenhouse-Geisser	1.91675e+06	1	1.91675e+06	2.13479	0.148224	0.0280396	2.13479	0.302628				Greenhouse-Geisser	9.63232e+07	2.07774	4.63595e+07	5.50601	0.00440547	0.0692527	11.4401	0.855648			days * genotype	Sphericity Assumed	1.85569e+08	4	4.63923e+07	5.95154	0.000172278	0.129518	23.8061	0.982939			days * genotype	Sphericity Assumed	2.08595e+06	4	521486	1.49724	0.206462	0.0421791	5.98896	0.454478			Total	3991750965
	Huynh-Feldt	1.91675e+06	1	1.91675e+06	2.13479	0.148224	0.0280396	2.13479	0.302628				Huynh-Feldt	9.63232e+07	2.22551	4.32813e+07	5.50601	0.00354799	0.0692527	12.2537	0.873414				Greenhouse-Geisser	1.85569e+08	2.05419	9.0337e+07	5.95154	0.00357366	0.129518	12.2256	0.874303				Greenhouse-Geisser	2.08595e+06	2.01274	1.03637e+06	1.49724	0.230923	0.0421791	3.01356	0.309672			Corrected Total	1.63502e+09
	Lower-bound	1.91675e+06	1	1.91675e+06	2.13479	0.148224	0.0280396	2.13479	0.302628				Lower-bound	9.63232e+07	1	9.63232e+07	5.50601	0.0216307	0.0692527	5.50601	0.639085				Huynh-Feldt	1.85569e+08	2.22095	8.35539e+07	5.95154	0.00274544	0.129518	13.2181	0.893259				Huynh-Feldt	2.08595e+06	2.20271	946989	1.49724	0.22918	0.0421791	3.29799	0.324901
days * treatment	Sphericity Assumed	2.93638e+06	1	2.93638e+06	3.2704	0.074603	0.0423241	3.2704	0.430623			days * treatment	Sphericity Assumed	2.00929e+08	4	5.02322e+07	11.4854	1.11195e-08	0.134355	45.9417	0.999964				Lower-bound	1.85569e+08	1	1.85569e+08	5.95154	0.0192331	0.129518	5.95154	0.663028				Lower-bound	2.08595e+06	1	2.08595e+06	1.49724	0.229509	0.0421791	1.49724	0.221249
	Greenhouse-Geisser	2.93638e+06	1	2.93638e+06	3.2704	0.074603	0.0423241	3.2704	0.430623				Greenhouse-Geisser	2.00929e+08	2.07774	9.67052e+07	11.4854	1.70975e-05	0.134355	23.8638	0.994018			Error(days)	Sphericity Assumed	1.2472e+09	160	7.79502e+06								Error(days)	Sphericity Assumed	4.73686e+07	136	348298
	Huynh-Feldt	2.93638e+06	1	2.93638e+06	3.2704	0.074603	0.0423241	3.2704	0.430623				Huynh-Feldt	2.00929e+08	2.22551	9.02841e+07	11.4854	9.67892e-06	0.134355	25.561	0.995899				Greenhouse-Geisser	1.2472e+09	82.1675	1.51788e+07									Greenhouse-Geisser	4.73686e+07	68.4333	692186
	Lower-bound	2.93638e+06	1	2.93638e+06	3.2704	0.074603	0.0423241	3.2704	0.430623				Lower-bound	2.00929e+08	1	2.00929e+08	11.4854	0.00112736	0.134355	11.4854	0.916936				Huynh-Feldt	1.2472e+09	88.8382	1.4039e+07									Huynh-Feldt	4.73686e+07	74.8923	632489
days * genotype * treatment	Sphericity Assumed	80005.4	1	80005.4	0.0891061	0.766153	0.00120269	0.0891061	0.060004			days * genotype * treatment	Sphericity Assumed	7.69361e+07	4	1.9234e+07	4.3978	0.00181094	0.056096	17.5912	0.933705				Lower-bound	1.2472e+09	40	3.11801e+07									Lower-bound	4.73686e+07	34	1.39319e+06
	Greenhouse-Geisser	80005.4	1	80005.4	0.0891061	0.766153	0.00120269	0.0891061	0.060004				Greenhouse-Geisser	7.69361e+07	2.07774	3.70287e+07	4.3978	0.0128715	0.056096	9.13751	0.763337
	Huynh-Feldt	80005.4	1	80005.4	0.0891061	0.766153	0.00120269	0.0891061	0.060004				Huynh-Feldt	7.69361e+07	2.22551	3.457e+07	4.3978	0.0110449	0.056096	9.78737	0.784499			Tests of Between-Subjects Effectsa												Tests of Between-Subjects Effectsa
	Lower-bound	80005.4	1	80005.4	0.0891061	0.766153	0.00120269	0.0891061	0.060004				Lower-bound	7.69361e+07	1	7.69361e+07	4.3978	0.039402	0.056096	4.3978	0.543771			Measure:	MEASURE_1											Measure:	MEASURE_1
Error(days)	Sphericity Assumed	6.64421e+07	74	897867								Error(days)	Sphericity Assumed	1.29457e+09	296	4.37355e+06								Transformed Variable:	Average											Transformed Variable:	Average
	Greenhouse-Geisser	6.64421e+07	74	897867									Greenhouse-Geisser	1.29457e+09	153.753	8.41981e+06								Source	Type III Sum of Squares	df	Mean Square	F	Sig.	Partial Eta Squared	Noncent. Parameter	Observed Powerb				Source	Type III Sum of Squares	df	Mean Square	F	Sig.	Partial Eta Squared	Noncent. Parameter	Observed Powerb
	Huynh-Feldt	6.64421e+07	74	897867									Huynh-Feldt	1.29457e+09	164.688	7.86075e+06								Intercept	9.38244e+09	1	9.38244e+09	84.3258	2.12661e-11	0.678265	84.3258	1				Intercept	1.92895e+08	1	1.92895e+08	252.05	2.7195e-17	0.88114	252.05	1
	Lower-bound	6.64421e+07	74	897867									Lower-bound	1.29457e+09	74	1.74942e+07								genotype	6.94214e+08	1	6.94214e+08	6.23934	0.0167068	0.134936	6.23934	0.683529				genotype	1.0052e+06	1	1.0052e+06	1.31346	0.259772	0.0371943	1.31346	0.199807
																								Error	4.45056e+09	40	1.11264e+08									Error	2.60204e+07	34	765305
Tests of Between-Subjects Effects												Tests of Between-Subjects Effects
Measure:	MEASURE_1											Measure:	MEASURE_1
Transformed Variable:	Average											Transformed Variable:	Average
Source	Type III Sum of Squares	df	Mean Square	F	Sig.	Partial Eta Squared	Noncent. Parameter	Observed Powera				Source	Type III Sum of Squares	df	Mean Square	F	Sig.	Partial Eta Squared	Noncent. Parameter	Observed Powera
Intercept	3.47847e+08	1	3.47847e+08	214.288	1.50077e-23	0.743312	214.288	1				Intercept	5.76832e+09	1	5.76832e+09	95.3529	6.06037e-15	0.563043	95.3529	1
genotype	292311	1	292311	0.180076	0.672539	0.00242755	0.180076	0.0703309				genotype	2.9408e+08	1	2.9408e+08	4.86129	0.0305737	0.0616435	4.86129	0.585599
treatment	3.75927e+06	1	3.75927e+06	2.31587	0.132322	0.0303458	2.31587	0.32378				treatment	3.08601e+09	1	3.08601e+09	51.0132	5.33044e-10	0.408063	51.0132	1
genotype * treatment	231041	1	231041	0.142331	0.707055	0.00191969	0.142331	0.0660328				genotype * treatment	3.4675e+08	1	3.4675e+08	5.73194	0.0191931	0.0718902	5.73194	0.656541
Error	1.20122e+08	74	1.62327e+06									Error	4.47658e+09	74	6.04944e+07
Figure 6B & C (Amphetamine sensitization Challenge Day) - Univariate Analysis of Variance - RM ANOVA
Challenge Day - AMPH and VEH (Figure 6B)										AMPH Challenge Day Fig 6C (over time, AMPH-treated)												AMPH Challenge Day Fig 6B (over time, Veh-treated)
Tests of Between-Subjects Effects										Tests of Within-Subjects Effectsa												Tests of Within-Subjects Effectsa
Dependent Variable:	AMPH challenge									Measure:	MEASURE_1											Measure:	MEASURE_1
Source	Type III Sum of Squares	df	Mean Square	F	Sig.	Partial Eta Squared	Noncent. Parameter	Observed Powerb		Source		Type III Sum of Squares	df	Mean Square	F	Sig.	Partial Eta Squared	Noncent. Parameter	Observed Powerb			Source		Type III Sum of Squares	df	Mean Square	F	Sig.	Partial Eta Squared	Noncent. Parameter	Observed Powerb
Corrected Model	647194543.212a	3	2.15732e+08	6.72571	0.000448332	0.214247	20.1771	0.969006		bins	Sphericity Assumed	1.5958e+07	8	1.99475e+06	12.8398	4.8798e-16	0.242995	102.719	1			bins	Sphericity Assumed	4.87978e+06	8	609972	6.25315	1.97847e-07	0.155346	50.0252	0.999892
Intercept	4.01248e+09	1	4.01248e+09	125.094	1.44495e-17	0.628317	125.094	1			Greenhouse-Geisser	1.5958e+07	2.93225	5.44225e+06	12.8398	3.25864e-07	0.242995	37.6495	0.999762				Greenhouse-Geisser	4.87978e+06	1.93261	2.52497e+06	6.25315	0.00359832	0.155346	12.0849	0.873594
genotype	8.85977e+07	1	8.85977e+07	2.76215	0.100749	0.0359832	2.76215	0.374811			Huynh-Feldt	1.5958e+07	3.26846	4.88243e+06	12.8398	8.3416e-08	0.242995	41.9664	0.999915				Huynh-Feldt	4.87978e+06	2.10725	2.31571e+06	6.25315	0.00268668	0.155346	13.177	0.894579
treatment	4.38593e+08	1	4.38593e+08	13.6737	0.000414887	0.155961	13.6737	0.954432			Lower-bound	1.5958e+07	1	1.5958e+07	12.8398	0.000910955	0.242995	12.8398	0.937733				Lower-bound	4.87978e+06	1	4.87978e+06	6.25315	0.0173804	0.155346	6.25315	0.680667
genotype * treatment	1.02248e+08	1	1.02248e+08	3.1877	0.0782917	0.0412981	3.1877	0.421728		bins * genotype	Sphericity Assumed	715268	8	89408.6	0.575505	0.79793	0.0141835	4.60404	0.266425			bins * genotype	Sphericity Assumed	413748	8	51718.5	0.530194	0.833411	0.0153545	4.24155	0.24474
Error	2.3736e+09	74	3.20756e+07								Greenhouse-Geisser	715268	2.93225	243932	0.575505	0.628369	0.0141835	1.68752	0.164667				Greenhouse-Geisser	413748	1.93261	214088	0.530194	0.584894	0.0153545	1.02466	0.132509
Total	7269797101	78									Huynh-Feldt	715268	3.26846	218840	0.575505	0.646627	0.0141835	1.88101	0.172227				Huynh-Feldt	413748	2.10725	196345	0.530194	0.600078	0.0153545	1.11725	0.136438
Corrected Total	3.02079e+09	77									Lower-bound	715268	1	715268	0.575505	0.452527	0.0141835	0.575505	0.114803				Lower-bound	413748	1	413748	0.530194	0.471511	0.0153545	0.530194	0.109066
										Error(bins)	Sphericity Assumed	4.97142e+07	320	155357								Error(bins)	Sphericity Assumed	2.65326e+07	272	97546.3
Tests of Between-Subjects Effects											Greenhouse-Geisser	4.97142e+07	117.29	423858									Greenhouse-Geisser	2.65326e+07	65.7088	403791
Dependent Variable:	VEH Challenge										Huynh-Feldt	4.97142e+07	130.738	380257									Huynh-Feldt	2.65326e+07	71.6465	370327
Source	Type III Sum of Squares	df	Mean Square	F	Sig.	Partial Eta Squared	Noncent. Parameter	Observed Powerb			Lower-bound	4.97142e+07	40	1.24285e+06									Lower-bound	2.65326e+07	34	780370
Corrected Model	16484363.192a	3	5.49479e+06	1.41535	0.245073	0.0542653	4.24604	0.360941
Intercept	1.72905e+08	1	1.72905e+08	44.537	3.96612e-09	0.375722	44.537	0.999998		Tests of Between-Subjects Effectsa												Tests of Between-Subjects Effectsa
genotype	0.27631	1	0.27631	7.11719e-08	0.999788	9.61782e-10	7.11719e-08	0.05		Measure:	MEASURE_1											Measure:	MEASURE_1
treatment	1.56478e+07	1	1.56478e+07	4.03055	0.0483348	0.0516535	4.03055	0.508646		Transformed Variable:	Average											Transformed Variable:	Average
genotype * treatment	631173	1	631173	0.162578	0.687957	0.00219218	0.162578	0.0683361		Source	Type III Sum of Squares	df	Mean Square	F	Sig.	Partial Eta Squared	Noncent. Parameter	Observed Powerb				Source	Type III Sum of Squares	df	Mean Square	F	Sig.	Partial Eta Squared	Noncent. Parameter	Observed Powerb
Error	2.87289e+08	74	3.88229e+06							Intercept	4.28283e+08	1	4.28283e+08	89.3594	9.53334e-12	0.690784	89.3594	1				Intercept	9.2616e+07	1	9.2616e+07	43.723	1.39566e-07	0.562549	43.723	0.999996
Total	485602749	78								genotype	2.2981e+07	1	2.2981e+07	4.79487	0.0344374	0.107041	4.79487	0.570267				genotype	25178.4	1	25178.4	0.0118865	0.913824	0.00034948	0.0118865	0.0512876
Corrected Total	3.03774e+08	77								Error	1.91713e+08	40	4.79282e+06									Error	7.20203e+07	34	2.11824e+06
a. R Squared = .054 (Adjusted R Squared = .016)
b. Computed using alpha =
[truncated: 25 more columns]

## Sheet: Figure 6E & 6F
Latent Inhibition
Context Fear Conditioning - Day 2
mouse ID	Genotype	Training	Freezing (%)		mouse ID	Genotype	Training	Freezing (%)
3057	CTRL	NPE	6.57		3149	CTRL	PE20	67.43
3066	CTRL	NPE	32.61		3188	CTRL	PE20	14.3
3372	CTRL	NPE	20.52		3326	CTRL	PE20	49.22
3777	CTRL	NPE	7.12		3328	CTRL	PE20	51.7
3840	CTRL	NPE	29.49		3334	CTRL	PE20	30.66
3926	CTRL	NPE	23.87		3335	CTRL	PE20	29.6
		AVG	20.03		3389	CTRL	PE20	30.27
n=	6	SEM	4.51137		3390	CTRL	PE20	46.08
							AVG	39.9075
					n=	8	SEM	5.91874
mouse ID	Genotype	Training	Freezing (%)		mouse ID	Genotype	Training	Freezing (%)
3062	HET	NPE	59.38		3152	HET	PE20	77.23
3378	HET	NPE	17.31		3178	HET	PE20	60.99
3379	HET	NPE	37.71		3182	HET	PE20	22.54
3756	HET	NPE	21.65		3183	HET	PE20	14.75
3776	HET	NPE	32.33		3186	HET	PE20	28.21
3830	HET	NPE	39.51		3230	HET	PE20	40.76
3843	HET	NPE	47.41		3235	HET	PE20	27.56
3878	HET	NPE	16.65		3236	HET	PE20	27.34
3925	HET	NPE	5.73		3279	HET	PE20	18.21
3958	HET	NPE	52.59		3316	HET	PE20	40.81
3974	HET	NPE	54.29		3317	HET	PE20	46.19
		AVG	34.96				AVG	36.7809
n=	11	SEM	5.35071		n=	11	SEM	5.73939
STATISTICS
Related to Figure 6E (Latent inhibition, Context) - Univariate Analysis of Variance - ANOVA 2 (genotype) X 2 (preexposure) - results shown in the text
Tests of Between-Subjects Effects
Dependent Variable:	Tonefreez
Source	Type III Sum of Squares	df	Mean Square	F	Sig.	Partial Eta Squared	Noncent. Parameter	Observed Powerb
Corrected Model	1544.774a	3	514.925	1.76323	0.174012	0.141854	5.28969	0.415286
Intercept	36620.4	1	36620.4	125.397	1.32606e-12	0.796693	125.397	1
genotype	294.245	1	294.245	1.00757	0.323017	0.0305254	1.00757	0.163717
preexposure	994.374	1	994.374	3.40498	0.0742714	0.0961725	3.40498	0.432545
genotype * preexposure	688.597	1	688.597	2.35793	0.134477	0.0686284	2.35793	0.319319
Error	9345.11	32	292.035
Total	52818.6	36
Corrected Total	10889.9	35
Tone Fear Conditioning - Day 3
Over time - Figure 6E
NPE
mouse ID	Genotype	Training	Bin 1	Bin 2	Bin 3	Bin 4	Bin 5	Bin 6	Bin 7	Bin 8	Bin 9	Bin 10	Bin 11
3057	CTRL	NPE	0	10.22	9.33	77.78	58.93	59.56	58.22	57.33	45.78	34.82	6.25
3777	CTRL	NPE	0	9.78	1.78	35.11	35.27	40	34.22	18.22	8	4.46	7.14
3066	CTRL	NPE	1.79	4.89	10.22	74.22	40.62	35.11	24.44	12.44	21.33	25	14.35
3840	CTRL	NPE	4.02	24.89	16.44	79.56	64.73	75.11	64	62.67	55.11	8.48	25.56
3926	CTRL	NPE	5.8	18.67	21.33	81.78	88.39	75.56	81.78	60.89	67.56	60.27	9.37
3372	CTRL	NPE	4.91	8.89	21.78	81.78	48.21	56.44	16.44	46.22	57.33	34.37	7.14
		AVG	2.75333	12.89	13.48	71.705	56.025	56.9633	46.5167	42.9617	42.5183	27.9	11.635
n=	6	SEM	1.02677	3.0233	3.18336	7.40976	7.87584	6.94617	10.3752	9.07493	9.40943	8.31173	3.03214
3756	HET	NPE	4.46	4.89	27.56	50.67	48.21	41.78	22.22	6.67	4.44	14.29	44.64
3776	HET	NPE	6.7	24.44	27.56	81.33	91.96	97.33	91.56	89.78	97.78	83.48	29.02
3830	HET	NPE	0	7.56	0	87.11	87.05	84	69.33	37.78	48	62.05	22.87
3843	HET	NPE	0	4.44	9.33	92.44	84.82	72	58.22	32.44	27.11	59.37	58.74
3062	HET	NPE	3.57	30.67	10.67	86.22	69.2	63.56	90.18	71.56	68.89	62.95	74.11
3878	HET	NPE	7.14	4	9.78	35.56	30.36	8	7.56	8.89	25.78	25	19.2
3925	HET	NPE	1.34	5.33	0	88	79.02	36.89	30.22	19.56	9.33	16.07	9.82
3958	HET	NPE	12.05	16.89	10.22	78.22	91.96	93.33	81.78	77.33	83.56	34.37	66.07
3974	HET	NPE	28.57	20	41.78	83.11	69.2	56.89	70.67	58.22	65.33	51.79	62.5
3378	HET	NPE	3.57	13.78	16.89	81.33	68.75	79.11	60.89	24	32.44	17.41	50
3379	HET	NPE	7.14	19.56	34.22	81.78	88.39	73.78	69.78	82.22	26.67	38.84	54.46
		AVG	6.77636	13.7782	17.0918	76.8882	73.5382	64.2427	59.31	46.2227	44.4845	42.3291	44.6755
n=	11	SEM	2.43154	2.78418	4.16535	5.27101	5.8819	8.07571	8.38865	9.22977	9.22614	6.98046	6.43019
PE
mouse ID	Genotype	Training	Bin 1	Bin 2	Bin 3	Bin 4	Bin 5	Bin 6	Bin 7	Bin 8	Bin 9	Bin 10	Bin 11
3326	CTRL	PE20	3.57	4	30.36	73.33	33.93	27.56	54.22	76.89	41.78	20.98	44.2
3149	CTRL	PE20	26.46	27.56	10.22	72.89	70.22	73.21	68.89	85.33	81.78	34.48	64.5
3188	CTRL	PE20	0	3.11	16.44	25.78	51.79	40.44	30.67	38.84	2.67	31.7	19.64
3328	CTRL	PE20	1.79	18.22	24.89	73.78	49.55	51.11	63.11	22.22	4.89	33.48	62.5
3334	CTRL	PE20	7.14	18.22	16	96.89	90.62	100	86.67	91.56	88.44	32.7	20.64
3335	CTRL	PE20	2.23	18.67	3.56	14.67	9.82	27.56	21.33	44.44	57.33	18.75	4.46
3389	CTRL	PE20	8.04	15.11	11.11	43.56	37.95	29.78	33.78	24.89	32.44	53.57	50
3390	CTRL	PE20	0	0	6.67	55.56	58.93	80	67.56	48	65.78	25	20.09
		AVG	6.15375	13.1113	14.9062	57.0575	50.3513	53.7075	53.2787	54.0213	46.8888	31.3325	35.7538
n=	8	SEM	3.0872	3.40903	3.20432	9.76614	8.61775	9.76265	7.98689	9.57196	11.4672	3.81871	7.93808
3235	HET	PE20	29.46	13.33	16.89	42.22	50	47.56	50.22	59.11	65.62	48.89	37.5
3236	HET	PE20	6.7	11.56	11.11	72	63.39	43.11	10.22	23.11	20.09	26.67	11.16
3316	HET	PE20	15.62	8.89	20.44	56.44	44.2	37.78	59.56	65.33	40.18	36.89	37.05
3317	HET	PE20	9.37	2.22	19.11	60	23.66	12.44	16.89	47.56	40.89	37.05	48.66
3230	HET	PE20	18.3	13.33	11.16	42.67	43.75	35.11	20	5.78	44	36.61	31.25
3279	HET	PE20	5.36	12	2.67	16.44	35.27	16.44	1.33	1.33	26.67	36.61	48.66
3152	HET	PE20	1.35	5.33	20.44	26.22	44.44	18.3	12.44	6.22	14.67	28	32.59
3186	HET	PE20	8.04	5.33	9.33	46.22	45.09	52.44	16	9.37	23.56	6.7	15.62
3178	HET	PE20	19.2	40.89	55.56	81.78	74.11	37.78	36.44	33.78	64	68.75	29.91
3182	HET	PE20	43.75	32.44	5.78	44.89	46.43	41.33	23.11	14.22	18.67	24.55	31.7
3183	HET	PE20	25.45	3.56	13.33	29.33	43.75	31.11	2.22	4.89	30.67	35.71	17.41
		AVG	16.6	13.5345	16.8927	47.11	46.7355	33.9455	22.5845	24.6091	35.3655	35.13	31.0464
n=	11	SEM	3.78261	3.68755	4.25036	5.89085	3.96995	3.95248	5.66318	7.02283	5.25784	4.64538	3.71937
Total Freezing during CS presentation (8 min) - Figure 6F
mouse ID	Genotype	Training	Freezing (%) Pre-CS	Freezing (%) During CS		mouse ID	Genotype	Training	Freezing (%) Pre-CS	Freezing (%) During CS
3057	CTRL	NPE	6.53	49.86		3326	CTRL	PE20	12.63	46.63
3777	CTRL	NPE	3.86	22.82		3149	CTRL	PE20	21.4	79.09
3066	CTRL	NPE	5.64	30.96		3188	CTRL	PE20	6.53	30.18
3840	CTRL	NPE	15.13	54.45		3328	CTRL	PE20	14.99	45.08
3926	CTRL	NPE	15.28	65.72		3334	CTRL	PE20	13.8	92.82
3372	CTRL	NPE	11.87	43.52		3335	CTRL	PE20	8.16	24.82
		AVG	9.71833	44.555		3389	CTRL	PE20	11.42	38.23
n=	6	SEM	2.04912	6.40915		3390	CTRL	PE20	2.23	52.64
								AVG	11.395	51.1863
						n=	8	SEM	2.06356	8.32
mouse ID	Genotype	Training	Freezing (%) Pre-CS	Freezing (%) During CS		mouse ID	Genotype	Training	Freezing (%) Pre-CS	Freezing (%) During CS
3756	HET	NPE	12.31	29.1		3235	HET	PE20	19.88	50.14
3776	HET	NPE	19.58	82.8		3236	HET	PE20	9.79	33.72
3830	HET	NPE	2.52	62.31		3316	HET	PE20	14.99	47.19
3843	HET	NPE	4.6	60.63		3317	HET	PE20	10.24	35.89
3062	HET	NPE	14.99	73.33		3230	HET	PE20	14.26	32.39
3878	HET	NPE	6.97	20.03		3279	HET	PE20	6.68	22.82
3925	HET	NPE	2.23	36.12		3152	HET	PE20	9.06	22.86
3958	HET	NPE	13.06	75.85		3186	HET	PE20	7.57	26.89
3974	HET	NPE	30.12	64.72		3178	HET	PE20	38.58	53.31
3378	HET	NPE	11.42	51.75		3182	HET	PE20	27.3	30.61
3379	HET	NPE	20.33	64.5		3183	HET	PE20	14.09	24.37
		AVG	12.5573	56.4673				AVG	15.6764	34.5627
n=	11	SEM	2.57195	6.06814		n=	11	SEM	2.91856	3.32208
STATISTICS
Figure 6E (Latent inhibition, Tone) - Univariate Analysis of Variance - 3 or 8 (bins of 10 min) x 2 (prexposure) RM ANOVA for each genotype
Before CS (3 bins of 10 min) - CTRL												During CS (3 bins of 10 min) - DAT GLS1 cHET
Tests of Within-Subjects Effectsa												Tests of Within-Subjects Effectsa
Measure:	MEASURE_1											Measure:	MEASURE_1
Source		Type III Sum of Squares	df	Mean Square	F	Sig.	Partial Eta Squared	Noncent. Parameter	Observed Powerb			Source		Type III Sum of Squares	df	Mean Square	F	Sig.	Partial Eta Squared	Noncent. Parameter	Observed Powerb
bins	Sphericity Assumed	774.099	2	387.05	7.2837	0.00337201	0.377713	14.5674	0.903686			bins	Sphericity Assumed	316.326	2	158.163	1.81949	0.17527	0.0833883	3.63898	0.357328
	Greenhouse-Geisser	774.099	1.47791	523.779	7.2837	0.0083466	0.377713	10.7647	0.822393				Greenhouse-Geisser	316.326	1.75345	180.402	1.81949	0.180589	0.0833883	3.19038	0.332524
	Huynh-Feldt	774.099	1.77633	435.784	7.2837	0.00496414	0.377713	12.9383	0.874362				Huynh-Feldt	316.326	2	158.163	1.81949	0.17527	0.0833883	3.63898	0.357328
	Lower-bound	774.099	1	774.099	7.2837	0.0193511	0.377713	7.2837	0.698047				Lower-bound	316.326	1	316.326	1.81949	0.19245	0.0833883	1.81949	0.250304
bins * prexposure	Sphericity Assumed	17.6645	2	8.83226	0.16621	0.847835	0.0136616	0.33242	0.0727907			bins * prexposure	Sphericity Assumed	369.98	2	184.99	2.1281	0.132348	0.0961718	4.2562	0.410705
	Greenhouse-Geisser	17.6645	1.47791	11.9524	0.16621	0.783206	0.0136616	0.245644	0.0697216				Greenhouse-Geisser	369.98	1.75345	211.001	2.1281	0.139488	0.0961718	3.73151	0.381685
	Huynh-Feldt	17.6645	1.77633	9.94437	0.16621	0.823495	0.0136616	0.295245	0.0715316				Huynh-Feldt	369.98	2	184.99	2.1281	0.132348	0.0961718	4.2562	0.410705
	Lower-bound	17.6645	1	17.6645	0.16621	0.690682	0.0136616	0.16621	0.0663568				Lower-bound	369.98	1	369.98	2.1281	0.160147	0.0961718	2.1281	0.284465
Error(bins)	Sphericity Assumed	1275.34	24	53.1391								Error(bins)	Sphericity Assumed	3477.09	40	86.9272
	Greenhouse-Geisser	1275.34	17.7349	71.9111									Greenhouse-Geisser	3477.09	35.069	99.15
	Huynh-Feldt	1275.34	21.316	59.8301									Huynh-Feldt	3477.09	40	86.9272
	Lower-bound	1275.34	12	106.278									Lower-bound	3477.09	20	173.854
Tests of Between-Subjects Effectsa												Tests of Between-Subjects Effectsa
Measure:	MEASURE_1											Measure:	MEASURE_1
Transformed Variable:	Average											Transformed Variable:	Average
Source	Type III Sum of Squares	df	Mean Square	F	Sig.	Partial Eta Squared	Noncent. Parameter	Observed Powerb				Source	Type III Sum of Squares	df	Mean Square	F	Sig.	Partial Eta Squared	Noncent. Parameter	Observed Powerb
Intercept	4578.52	1	4578.52	50.22	1.27112e-05	0.807136	50.22	0.999996				Intercept	13144.3	1	13144.3	52.6682	5.07608e-07	0.724776	52.6682	1
prexposure	29.1217	1	29.1217	0.319424	0.582366	0.0259285	0.319424	0.0816686				prexposure	161.336	1	161.336	0.64646	0.430835	0.031311	0.64646	0.119449
Error	1094.03	12	91.1692									Error	4991.37	20	249.568
During CS (8 bins of 10 min) - CTRL												During CS (8 bins of 10 min) - CTRL
Tests of Within-Subjects Effectsa												Tests of Within-Subjects Effectsa
Measure:	MEASURE_1											Measure:	MEASURE_1
Source		Type III Sum of Squares	df	Mean Square	F	Sig.	Partial Eta Squared	Noncent. Parameter	Observed Powerb			Source		Type III Sum of Squares	df	Mean Square	F	Sig.	Partial Eta Squared	Noncent. Parameter	Observed Powerb
bins	Sphericity Assumed	17394.3	7	2484.9	8.90473	3.66231e-08	0.425967	62.3331	0.999994			bins	Sphericity Assumed	16655.4	7	2379.34	10.5755	1.23099e-10	0.345882	74.0287	1
	Greenhouse-Geisser	17394.3	3.6705	4738.96	8.90473	3.67132e-05	0.425967	32.6848	0.997177				Greenhouse-Geisser	16655.4	4.51088	3692.27	10.5755	1.45321e-07	0.345882	47.705	0.999946
	Huynh-Feldt	17394.3	5.92916	2933.69	8.90473	3.33109e-07	0.425967	52.7975	0.999954				Huynh-Feldt	16655.4	6.27792	2653.01	10.5755	9.51492e-10	0.345882	66.3923	0.999999
	Lower-bound	17394.3	1	17394.3	8.90473	0.011399	0.425967	8.90473	0.782036				Lower-bound	16655.4	1	16655.4	10.5755	0.0039923	0.345882	10.5755	0.871276
bins * prexposure	Sphericity Assumed	3247.53	7	463.933	1.66252	0.129429	0.121685	11.6376	0.650846			bins * prexposure	Sphericity Assumed	4534.03	7	647.718	2.87893	0.00770522	0.125833	20.1525	0.915453
	Greenhouse-Geisser	3247.53	3.6705	884.765	1.66252	0.179989	0.121685	6.10226	0.448911				Greenhouse-Geisser	4534.03	4.51088	1005.13	2.87893	0.0222605	0.125833	12.9865	0.794955
	Huynh-Feldt	3247.53	5.92916	547.722	1.66252	0.143713	0.121685	9.85732	0.594222				Huynh-Feldt	4534.03	6.27792	722.218	2.87893	0.0104436	0.125833	18.0737	0.890061
	Lower-bound	3247.53	1	3247.53	1.66252	0.221563	0.121685	1.66252	0.220828				Lower-bound	4534.03	1	4534.03	2.87893	0.105255	0.125833	2.87893	0.365395
Error(bins)	Sphericity Assumed	23440.6	84	279.054								Error(bins)	Sphericity Assumed	31498	140	224.986
	Greenhouse-Geisser	23440.6	44.046	532.184									Greenhouse-Geisser	31498	90.2177	349.134
	Huynh-Feldt	23440.6	71.1499	329.453									Huynh-Feldt	31498	125.558	250.864
	Lower-bound	23440.6	12	1953.38									Lower-bound	31498	20	1574.9
Tests of Between-Subjects Effectsa												Tests of Between-Subjects Effectsa
Measure:	MEASURE_1											Measure:	MEASURE_1
Transformed Variable:	Average											Transformed Variable:	Average
Source	Type III Sum of Squares	df	Mean Square	F	Sig.	Partial Eta Squared	Noncent. Parameter	Observed Powerb				Source	Type III Sum of Squares	df	Mean Square	F	Sig.	Partial Eta Squared	Noncent. Parameter	Observed Powerb
Intercept	233730	1	233730	102.317	3.16402e-07	0.895029	102.317	1				Intercept	364582	1	364582	173.283	2.60519e-11	0.896525	173.283	1
prexposure	290.634	1	290.634	0.127227	0.727517	0.0104911	0.127227	0.0624953				prexposure	21094.3	1	21094.3	10.0259	0.00485445	0.333909	10.0259	0.853421
Error	27412.4	12	2284.37									Error	42079.4	20	2103.97
Figure 6F (Latent inhibition, Tone) - Univariate Analysis of Variance - ANOVA 2 (genotype) x 2 (preexposure)
Veh-treated group											Veh-treated group, CTRL											Veh-treated group, DAT GLS1 cHET											Veh-treated group, Non preexposed group										Veh-treated group, Preexposed group
Tests of Between-Subjects Effectsa											Tests of Between-Subjects Effectsa											Tests of Between-Subjects Effectsa											Tests of Between-Subjects Effectsa										Tests of Between-Subjects Effectsa
Dependent Variable:	Tonefreez										Dependent Variable:	Tonefreez										Dependent Variable:	Tonefreez										Dependent Variable:	Tonefreez									Dependent Variable:	Tonefreez
Source	Type III Sum of Squares	df	Mean Square	F	Sig.	Partial Eta Squared	Noncent. Parameter	Observed Powerc			Source	Type III Sum of Squares	df	Mean Square	F	Sig.	Partial Eta Squared	Noncent. Parameter	Observed Powerc			Source	Type III Sum of Squares	df	Mean Square	F	Sig.	Partial Eta Squared	Noncent. Parameter	Observed Powerc			Source	Type III Sum of Squares	df	Mean Square	F	Sig.	Partial Eta Squared	Noncent. Parameter	Observed Powerc		Source	Type III Sum of Squares	df	Mean Square	F	Sig.	Partial Eta Squared
Corrected Model	2858.202b	3	952.734	2.93906	0.0480076	0.216016	8.81718	0.642141			Corrected Model	150.766b	1	150.766	0.354135	0.562836	0.0286653	0.354135	0.0851651			Corrected Model	2638.950b	1	2638.95	10.0256	0.00485511	0.333901	10.0256	0.853408			Corrected Model	550.915b	1	550.915	1.56428	0.230198	0.0944367	1.56428	0.216116		Corrected Model	1279.898b	1	1279.9	4.27434	0.0542646	0.200915
Intercept	73674	1	73674	227.274	4.31559e-16	0.876579	227.274	1			Intercept	31427.6	1	31427.6	73.8204	1.79738e-06	0.860173	73.8204	1			Intercept	45575.5	1	45575.5	173.145	2.62393e-11	0.896451	173.145	1			Intercept	39621.4	1	39621.4	112.502	2.28986e-08	0.882354	112.502	1		Intercept	34055.5	1	34055.5	113.731	5.98146e-09	0.869962
genotype	46.8777	1	46.8777	0.144612	0.706251	0.00449878	0.144612	0.065739			preexposure	150.766	1	150.766	0.354135	0.562836	0.0286653	0.354135	0.0851651			preexposure	2638.95	1	2638.95	10.0256	0.00485511	0.333901	10.0256	0.853408			genotype	550.915	1	550.915	1.56428	0.230198	0.0944367	1.56428	0.216116		genotype	1279.9	1	1279.9	4.27434	0.0542646	0.200915
preexposure	492.674	1	492.674	1.51983	0.226625	0.0453413	1.51983	0.223246			Error	5108.77	12	425.731								Error	5264.44	20	263.222								Error	5282.78	15	352.185							Error	5090.44	17	299.438
genotype * preexposure	1719.78	1	1719.78	5.30531	0.027909	0.142213	5.30531	0.607922			Total	37979.9	14									Total	53478.9	22									Total	52267.7	17								Total	39191.1	19
Error	10373.2	32	324.163								Corrected Total	5259.54	13									Corrected Total	7903.39	21									Corrected Total	5833.69	16								Corrected Total	6370.34	18
Total	91458.8	36
Corrected Total	13231.4	35
[truncated: 2 more columns]

## Sheet: Figure 6H & 6I
EMX1 GLS1 cHET mice - Novelty-Induced Locomotion and Amphetamine Sensitization
Novelty-induced locomotion - figure 6H
Cage	Mouse ID	Genotype	Drug treatment	BM bin1	BM bin2	BM bin3	BM bin4	BM bin5	BM bin6
7	2931	ctrl	vehicle	1309	946	834	1275	1187	867
2	2934	ctrl	vehicle	1887	1432	1356	1468	1290	1245
10	4105	ctrl	vehicle	1111	860	786	700	552	375
4	4117	ctrl	vehicle	1422	730	789	533	436	467
10	4138	ctrl	vehicle	1341	608	453	266	134	153
6	4140	ctrl	vehicle	1705	1341	1580	1099	1368	1348
3	4169	ctrl	vehicle	1619	1047	942	766	915	566
1	4190	ctrl	vehicle	1663	1303	1122	788	505	366
7	4207	ctrl	vehicle	1559	955	1002	744	397	168
1	2932	ctrl	vehicle	1389	969	828	643	299	160
8	4102	ctrl	vehicle	1737	1279	1120	847	932	98
2	4115	ctrl	vehicle	1524	797	961	734	788	1089
8	4131	ctrl	vehicle	1300	1096	678	523	498	465
4	4170	ctrl	vehicle	1333	927	999	636	745	309
6	4175	ctrl	vehicle	1283	1132	874	701	744	240
3	4192	ctrl	vehicle	1256	840	603	482	235	317
6	4205	ctrl	vehicle	1517	1152	511	457	135	51
			AVG	1467.94	1024.35	908.118	744.824	656.471	487.294
			SEM	50.0576	55.5266	69.5771	72.8563	93.7354	98.5232
5	2937	het	vehicle	1751	1266	1330	1459	1219	1134
9	4104	het	vehicle	1612	819	665	515	32	323
1	4108	het	vehicle	1385	810	538	260	466	131
5	4132	het	vehicle	2211	1121	917	472	833	427
9	4137	het	vehicle	1604	1143	824	601	487	182
1	4163	het	vehicle	1482	946	572	530	323	259
5	4171	het	vehicle	1698	1185	851	661	509	446
7	4176	het	vehicle	1137	938	1241	805	816	733
2	4191	het	vehicle	1427	998	736	716	394	33
5	4197	het	vehicle	1364	950	847	711	560	332
8	4211	het	vehicle	1428	703	566	389	265	17
6	2930	het	vehicle	1489	1316	1269	1110	1126	1165
4	2936	het	vehicle	1543	1016	1165	1042	1029	867
3	4116	het	vehicle	1559	990	967	464	322	436
7	4141	het	vehicle	1488	1054	853	418	68	204
2	4166	het	vehicle	1168	811	668	588	481	316
9	4179	ctrl	vehicle	1712	1347	1074	1012	890	1003
4	4196	het	vehicle	1598	991	775	453	437	39
9	4212	het	vehicle	1310	1098	819	614	582	452
			AVG	1524.53	1026.42	877.737	674.737	570.474	447.316
			SEM	54.086	40.5404	55.5334	68.1992	76.6312	83.5675
STATISTICS
Figure 6H (Novelty induced locomotion, EMX1 GLS1 cHET) - Univariate Analysis of Variance - RM ANOVA 2 (genotype) x 6 (bins of 10 mice)
Tests of Within-Subjects Effects
Measure:	MEASURE_1
Source		Type III Sum of Squares	df	Mean Square	F	Sig.	Partial Eta Squared	Noncent. Parameter	Observed Powera
bins	Sphericity Assumed	2.43044e+07	5	4.86087e+06	138.141	5.8085e-58	0.802487	690.705	1
	Greenhouse-Geisser	2.43044e+07	2.6124	9.30346e+06	138.141	1.74603e-31	0.802487	360.88	1
	Huynh-Feldt	2.43044e+07	2.93258	8.28772e+06	138.141	4.8582e-35	0.802487	405.109	1
	Lower-bound	2.43044e+07	1	2.43044e+07	138.141	1.59579e-13	0.802487	138.141	1
bins * genotype	Sphericity Assumed	144208	5	28841.6	0.819649	0.537221	0.0235398	4.09824	0.289503
	Greenhouse-Geisser	144208	2.6124	55201.3	0.819649	0.472027	0.0235398	2.14125	0.207987
	Huynh-Feldt	144208	2.93258	49174.6	0.819649	0.483654	0.0235398	2.40368	0.21964
	Lower-bound	144208	1	144208	0.819649	0.371654	0.0235398	0.819649	0.142327
Error(bins)	Sphericity Assumed	5.98192e+06	170	35187.8
	Greenhouse-Geisser	5.98192e+06	88.8217	67347.5
	Huynh-Feldt	5.98192e+06	99.7076	59994.7
	Lower-bound	5.98192e+06	34	175939
Tests of Between-Subjects Effects
Measure:	MEASURE_1
Transformed Variable:	Average
Source	Type III Sum of Squares	df	Mean Square	F	Sig.	Partial Eta Squared	Noncent. Parameter	Observed Powera
Intercept	1.62268e+08	1	1.62268e+08	469.771	1.75585e-21	0.932509	469.771	1
genotype	206956	1	206956	0.599147	0.444253	0.0173168	0.599147	0.116942
Error	1.17442e+07	34	345419
Amphetamine Sensitization - Figure 6I
Habituation/Saline 1 DAY 1					Habituation/Saline 2 DAY 2					AMPH 1 DAY 3					AMPH 2 DAY 4					AMPH 3 DAY 5					AMPH 4 DAY 6					AMPH 5 DAY 7					Saline Challenge DAY 18					Amphetamine Challenge DAY 19
VEHICLE (to be AMPHETAMINE 2.5 mg/kg)					VEHICLE (to be AMPHETAMINE 2.5 mg/kg)					AMPHETAMINE 2.5 mg/kg					AMPHETAMINE 2.5 mg/kg					AMPHETAMINE 2.5 mg/kg					AMPHETAMINE 2.5 mg/kg					AMPHETAMINE 2.5 mg/kg					VEHICLE					AMPHETAMINE 2.5 mg/kg
Mouse ID	Genotype	Drug treatment	Total Locomotion counts (90 min)		Mouse ID	Genotype	Drug treatment	Total Locomotion counts (90 min)		Mouse ID	Genotype	Drug treatment	Total Locomotion counts (90 min)		Mouse ID	Genotype	Drug treatment	Total Locomotion counts (90 min)		Mouse ID	Genotype	Drug treatment	Total Locomotion counts (90 min)		Mouse ID	Genotype	Drug treatment	Total Locomotion counts (90 min)		Mouse ID	Genotype	Drug treatment	Total Locomotion counts (90 min)		Mouse ID	Genotype	Drug treatment	Total Locomotion counts (90 min)		Mouse ID	Genotype	Drug treatment	Total Locomotion counts (90 min)
2931	ctrl	vehicle	1365		2931	ctrl	amph	477		2931	ctrl	amph	2843		2931	ctrl	amph	3750		2931	ctrl	amph	4939		2931	ctrl	amph	5300		2931	ctrl	amph	5604		2931	ctrl	amph	747		2931	ctrl	amph	7764
2934	ctrl	vehicle	1956		2934	ctrl	amph	666		2934	ctrl	amph	2819		2934	ctrl	amph	6135		2934	ctrl	amph	9404		2934	ctrl	amph	9691		2934	ctrl	amph	9797		2934	ctrl	amph	1439		2934	ctrl	amph	20048
4105	ctrl	vehicle	890		4105	ctrl	amph	227		4105	ctrl	amph	6188		4105	ctrl	amph	10017		4105	ctrl	amph	18233		4105	ctrl	amph	13325		4105	ctrl	amph	8840		4105	ctrl	amph	758		4105	ctrl	amph	13482
4117	ctrl	vehicle	1093		4117	ctrl	amph	536		4117	ctrl	amph	6103		4117	ctrl	amph	4869		4117	ctrl	amph	8308		4117	ctrl	amph	11792		4117	ctrl	amph	16142		4117	ctrl	amph	783		4117	ctrl	amph	14703
4138	ctrl	vehicle	433		4138	ctrl	amph	415		4138	ctrl	amph	3138		4138	ctrl	amph	6101		4138	ctrl	amph	4167		4138	ctrl	amph	3244		4138	ctrl	amph	7331		4138	ctrl	amph	424		4138	ctrl	amph	8776
4140	ctrl	vehicle	4628		4140	ctrl	amph	1301		4140	ctrl	amph	4773		4140	ctrl	amph	6095		4140	ctrl	amph	8402		4140	ctrl	amph	11245		4140	ctrl	amph	11063		4140	ctrl	amph	3023		4140	ctrl	amph	28790
4169	ctrl	vehicle	1092		4169	ctrl	amph	868		4169	ctrl	amph	3259		4169	ctrl	amph	5028		4169	ctrl	amph	2237		4169	ctrl	amph	4633		4169	ctrl	amph	3198		4169	ctrl	amph	372		4169	ctrl	amph	8706
4190	ctrl	vehicle	1096		4190	ctrl	amph	1241		4190	ctrl	amph	4115		4190	ctrl	amph	5222		4190	ctrl	amph	9697		4190	ctrl	amph	17490		4190	ctrl	amph	12759		4190	ctrl	amph	680		4190	ctrl	amph	17576
4207	ctrl	vehicle	1618		4207	ctrl	amph	1139		4207	ctrl	amph	9362		4207	ctrl	amph	7684		4207	ctrl	amph	16253		4207	ctrl	amph	18750		4207	ctrl	amph	21370		4207	ctrl	amph	896		4207	ctrl	amph	27262
	CTRL	AVG	1574.56			CTRL	AVG	763.333			CTRL	AVG	4733.33			CTRL	AVG	6100.11			CTRL	AVG	9071.11			CTRL	AVG	10607.8			CTRL	AVG	10678.2			CTRL	AVG	1013.56			CTRL	AVG	16345.2
	n=9	SEM	407.914			n=9	SEM	130.249			n=9	SEM	724.159			n=9	SEM	610.227			n=9	SEM	1767.3			n=9	SEM	1832.53			n=9	SEM	1847.32			n=9	SEM	271.125			9	SEM	2607.3
2937	het	vehicle	2406		2937	het	amph	541		2937	het	amph	3695		2937	het	amph	4947		2937	het	amph	10088		2937	het	amph	8309		2937	chet	amph	9273		2937	het	amph	746		2937	chet	amph	13160
4104	het	vehicle	567		4104	het	amph	514		4104	het	amph	4439		4104	het	amph	5512		4104	het	amph	8295		4104	het	amph	5071		4104	chet	amph	8188		4104	het	amph	354		4104	chet	amph	11345
4108	het	vehicle	387		4108	het	amph	1119		4108	het	amph	3121		4108	het	amph	7667		4108	het	amph	5620		4108	het	amph	6017		4108	chet	amph	5134		4108	het	amph	755		4108	chet	amph	7765
4132	het	vehicle	1236		4132	het	amph	1476		4132	het	amph	3501		4132	het	amph	3462		4132	het	amph	7931		4132	het	amph	7381		4132	chet	amph	14619		4132	het	amph	958		4132	chet	amph	18767
4137	het	vehicle	844		4137	het	amph	836		4137	het	amph	6270		4137	het	amph	11808		4137	het	amph	10721		4137	het	amph	17435		4137	chet	amph	14004		4137	het	amph	339		4137	chet	amph	22290
4163	het	vehicle	1386		4163	het	amph	1043		4163	het	amph	8132		4163	het	amph	12779		4163	het	amph	11302		4163	chet	amph	16572		4163	chet	amph	18286		4163	chet	amph	1088		4163	chet	amph	19507
4171	het	vehicle	1118		4171	het	amph	642		4171	het	amph	5279		4171	het	amph	6681		4171	het	amph	9111		4171	chet	amph	8389		4171	chet	amph	8113		4171	chet	amph	1911		4171	chet	amph	13854
4176	het	vehicle	1668		4176	het	amph	1914		4176	het	amph	3117		4176	het	amph	7722		4176	het	amph	17484		4176	chet	amph	22941		4176	chet	amph	24970		4176	chet	amph	2787		4176	chet	amph	31950
4191	het	vehicle	857		4191	het	amph	1042		4191	het	amph	4856		4191	het	amph	4556		4191	het	amph	5959		4191	chet	amph	7502		4191	chet	amph	5764		4191	chet	amph	595		4191	chet	amph	15484
4197	het	vehicle	1677		4197	het	amph	753		4197	het	amph	3200		4197	het	amph	3153		4197	het	amph	6206		4197	chet	amph	8831		4197	chet	amph	9692		4197	chet	amph	1074		4197	chet	amph	8550
4211	het	vehicle	897		4211	het	amph	703		4211	het	amph	5924		4211	het	amph	13372		4211	het	amph	8006		4211	chet	amph	6838		4211	chet	amph	5294		4211	chet	amph	542		4211	chet	amph	8542
	cHET	AVG	1185.73			cHET	AVG	962.091			cHET	AVG	4684.91			cHET	AVG	7423.55			cHET	AVG	9156.64			cHET	AVG	10480.5			cHET	AVG	11212.5			cHET	AVG	1013.55			cHET	AVG	15564.9
	n=11	SEM	174.231			n=11	SEM	128.456			n=11	SEM	484.896			n=11	SEM	1111.63			n=11	SEM	1010.27			n=11	SEM	1741.15			n=11	SEM	1871.29			n=11	SEM	221.335			11	SEM	2185.46
VEHICLE					VEHICLE					VEHICLE					VEHICLE					VEHICLE					VEHICLE					VEHICLE					VEHICLE					AMPHETAMINE 2.5 mg/kg
Mouse ID	Genotype	Drug treatment	Total Locomotion counts (90 min)		Mouse ID	Genotype	Drug treatment	Total Locomotion counts (90 min)		Mouse ID	Genotype	Drug treatment	Total Locomotion counts (90 min)		Mouse ID	Genotype	Drug treatment	Total Locomotion counts (90 min)		Mouse ID	Genotype	Drug treatment	Total Locomotion counts (90 min)		Mouse ID	Genotype	Drug treatment	Total Locomotion counts (90 min)		Mouse ID	Genotype	Drug treatment	Total Locomotion counts (90 min)		Mouse ID	Genotype	Drug treatment	Total Locomotion counts (90 min)		Mouse ID	Genotype	Drug treatment	Total Locomotion counts (90 min)
2932	ctrl	vehicle	1154		2932	ctrl	vehicle	675		2932	ctrl	vehicle	637		2932	ctrl	vehicle	774		2932	ctrl	vehicle	749		2932	ctrl	vehicle	913		2932	ctrl	vehicle	571		2932	ctrl	saline	779		2932	ctrl	saline	6669
4102	ctrl	vehicle	990		4102	ctrl	vehicle	807		4102	ctrl	vehicle	463		4102	ctrl	vehicle	994		4102	ctrl	vehicle	506		4102	ctrl	vehicle	793		4102	ctrl	vehicle	850		4102	ctrl	saline	973		4102	ctrl	saline	4203
4115	ctrl	vehicle	2439		4115	ctrl	vehicle	879		4115	ctrl	vehicle	454		4115	ctrl	vehicle	632		4115	ctrl	vehicle	348		4115	ctrl	vehicle	468		4115	ctrl	vehicle	582		4115	ctrl	saline	1790		4115	ctrl	saline	9525
4131	ctrl	vehicle	1089		4131	ctrl	vehicle	740		4131	ctrl	vehicle	452		4131	ctrl	vehicle	875		4131	ctrl	vehicle	678		4131	ctrl	vehicle	629		4131	ctrl	vehicle	632		4131	ctrl	saline	593		4131	ctrl	saline	6313
4170	ctrl	vehicle	651		4170	ctrl	vehicle	776		4170	ctrl	vehicle	291		4170	ctrl	vehicle	533		4170	ctrl	vehicle	733		4170	ctrl	vehicle	461		4170	ctrl	vehicle	789		4170	ctrl	vehicle	500		4170	ctrl	saline	5320
4175	ctrl	vehicle	1391		4175	ctrl	vehicle	1149		4175	ctrl	vehicle	802		4175	ctrl	vehicle	982		4175	ctrl	vehicle	892		4175	ctrl	vehicle	810		4175	ctrl	vehicle	803		4175	ctrl	vehicle	1084		4175	ctrl	saline	4535
4192	ctrl	vehicle	1159		4192	ctrl	vehicle	1621		4192	ctrl	vehicle	1257		4192	ctrl	vehicle	1205		4192	ctrl	vehicle	776		4192	ctrl	vehicle	1148		4192	ctrl	vehicle	926		4192	ctrl	vehicle	721		4192	ctrl	saline	4671
4205	ctrl	vehicle	975		4205	ctrl	vehicle	720		4205	ctrl	vehicle	793		4205	ctrl	vehicle	1152		4205	ctrl	vehicle	915		4205	ctrl	vehicle	681		4205	ctrl	vehicle	582		4205	ctrl	vehicle	555		4205	ctrl	saline	4083
	CTRL	AVG	1231			CTRL	AVG	920.875			CTRL	AVG	643.625			CTRL	AVG	893.375			CTRL	AVG	699.625			CTRL	AVG	737.875			CTRL	AVG	716.875			CTRL	AVG	874.375			CTRL	AVG	5664.88
	n=8	SEM	187.852			n=8	SEM	112.714			n=8	SEM	108.011			n=8	SEM	83.9592			n=8	SEM	67.3978			n=8	SEM	81.4701			n=8	SEM	49.8105			n=8	SEM	149.164			8	SEM	645.751
2930	het	vehicle	4417		2930	het	saline	664		2930	het	vehicle	1285		2930	het	vehicle	1074		2930	het	vehicle	512		2930	het	vehicle	1219		2930	chet	vehicle	1449		2930	het	saline	1342		2930	chet	saline	10398
2936	het	vehicle	3215		2936	het	saline	1172		2936	het	vehicle	737		2936	het	vehicle	1325		2936	het	vehicle	1482		2936	het	vehicle	917		2936	chet	vehicle	885		2936	het	saline	1527		2936	chet	saline	15120
4116	het	vehicle	758		4116	het	saline	807		4116	het	vehicle	1294		4116	het	vehicle	561		4116	het	vehicle	754		4116	het	vehicle	529		4116	chet	vehicle	430		4116	het	saline	630		4116	chet	saline	4743
4141	het	vehicle	831		4141	het	saline	829		4141	het	vehicle	195		4141	het	vehicle	1289		4141	het	vehicle	343		4141	het	vehicle	581		4141	chet	vehicle	283		4141	het	saline	332		4141	chet	saline	1683
4166	het	vehicle	1379		4166	het	vehicle	945		4179	het	vehicle	1105		4166	het	vehicle	497		4166	het	vehicle	861		4166	het	vehicle	670		4166	chet	vehicle	514		4166	chet	vehicle	910		4166	chet	saline	9351
4179	ctrl	vehicle	1379		4179	ctrl	vehicle	957		4166	het	vehicle	761		4179	ctrl	vehicle	560		4179	ctrl	vehicle	556		4179	ctrl	vehicle	651		4179	ctrl	vehicle	429		4179	ctrl	vehicle	983		4179	chet	saline	9311
4196	het	vehicle	927		4196	het	vehicle	926		4196	het	vehicle	482		4196	het	vehicle	664		4196	het	vehicle	1061		4196	het	vehicle	810		4196	chet	vehicle	1197		4196	chet	vehicle	781		4196	chet	saline	7016
4212	het	vehicle	1490		4212	het	vehicle	530		4212	het	vehicle	361		4212	het	vehicle	504		4212	het	vehicle	1113		4212	het	vehicle	1171		4212	chet	vehicle	771		4212	chet	vehicle	205		4212	chet	saline	16615
	cHET	AVG	1799.5			cHET	AVG	853.75			cHET	AVG	777.5			cHET	AVG	809.25			cHET	AVG	835.25			cHET	AVG	818.5			cHET	AVG	744.75			cHET	AVG	838.75			cHET	AVG	9279.62
	n=8	SEM	464.611			n=8	SEM	69.3216			n=8	SEM	148.42			n=8	SEM	126.898			n=8	SEM	132.182			n=8	SEM	93.0395			n=8	SEM	145.534			n=8	SEM	161.366			8	SEM	1755.54
STATISTICS
Figure 6I (AMPH sensitization, EMX1 GLS1 cHET) - Univariate Analysis of Variance
Amphetamine Injections (5 days)												Challenge Day
Tests of Within-Subjects Effects												Tests of Between-Subjects Effects
Measure:	MEASURE_1											Dependent Variable:	CHALL1
Source		Type III Sum of Squares	df	Mean Square	F	Sig.	Partial Eta Squared	Noncent. Parameter	Observed Powera			Source	Type III Sum of Squares	df	Mean Square	F	Sig.	Partial Eta Squared	Noncent. Parameter	Observed Powerb
days	Sphericity Assumed	2.45223e+08	4	6.13059e+07	11.2548	7.41638e-08	0.260198	45.0193	0.999937			Corrected Model	676965550.349a	3	2.25655e+08	5.90501	0.0025149	0.356331	17.715	0.928538
	Greenhouse-Geisser	2.45223e+08	1.98442	1.23575e+08	11.2548	6.83724e-05	0.260198	22.3343	0.989812			Intercept	4.89692e+09	1	4.89692e+09	128.144	1.00338e-12	0.80018	128.144	1
	Huynh-Feldt	2.45223e+08	2.31343	1.06e+08	11.2548	2.22044e-05	0.260198	26.0373	0.995411			genotype	1.27868e+07	1	1.27868e+07	0.334609	0.567007	0.0103483	0.334609	0.0868001
	Lower-bound	2.45223e+08	1	2.45223e+08	11.2548	0.00205671	0.260198	11.2548	0.901925			treatment	6.01859e+08	1	6.01859e+08	15.7496	0.000382529	0.329838	15.7496	0.970415
days * genotype	Sphericity Assumed	2.83089e+06	4	707723	0.129927	0.971255	0.00404381	0.519709	0.0762483			genotype * treatment	3.46566e+07	1	3.46566e+07	0.906903	0.348076	0.0275596	0.906903	0.152062
	Greenhouse-Geisser	2.83089e+06	1.98442	1.42656e+06	0.129927	0.876914	0.00404381	0.25783	0.0690612			Error	1.22285e+09	32	3.82142e+07
	Huynh-Feldt	2.83089e+06	2.31343	1.22368e+06	0.129927	0.904226	0.00404381	0.300578	0.070408			Total	7225827153	36
	Lower-bound	2.83089e+06	1	2.83089e+06	0.129927	0.720876	0.00404381	0.129927	0.0641285			Corrected Total	1.89982e+09	35
days * treatment	Sphericity Assumed	2.44301e+08	4	6.10753e+07	11.2125	7.87526e-08	0.259474	44.85	0.999934
	Greenhouse-Geisser	2.44301e+08	1.98442	1.2311e+08	11.2125	7.05328e-05	0.259474	22.2503	0.989579
	Huynh-Feldt	2.44301e+08	2.31343	1.05601e+08	11.2125	2.30148e-05	0.259474	25.9393	0.995286
	Lower-bound	2.44301e+08	1	2.44301e+08	11.2125	0.00209161	0.259474	11.2125	0.900863
days * genotype * treatment	Sphericity Assumed	3.51582e+06	4	878956	0.161363	0.957485	0.0050173	0.645453	0.0830843
	Greenhouse-Geisser	3.51582e+06	1.98442	1.77172e+06	0.161363	0.84975	0.0050173	0.320212	0.0738271
	Huynh-Feldt	3.51582e+06	2.31343	1.51975e+06	0.161363	0.879326	0.0050173	0.373302	0.0755487
	Lower-bound	3.51582e+06	1	3.51582e+06	0.161363	0.690575	0.0050173	0.161363	0.0675795
Error(days)	Sphericity Assumed	6.97225e+08	128	5.44707e+06
	Greenhouse-Geisser	6.97225e+08	63.5013	1.09797e+07
	Huynh-Feldt	6.97225e+08	74.0298	9.41817e+06
	Lower-bound	6.97225e+08	32	2.17883e+07
Tests of Between-Subjects Effects
Measure:	MEASURE_1
Transformed Variable:	Average
Source	Type III Sum of Squares	df	Mean Square	F	Sig.	Partial Eta Squared	Noncent. Parameter	Observed Powera
Intercept	3.70178e+09	1	3.70178e+09	109.772	7.15888e-12	0.774285	109.772	1
genotype	1.96136e+06	1	1.96136e+06	0.0581617	0.810964	0.00181426	0.0581617	0.0562968
treatment	2.56205e+09	1	2.56205e+09	75.9744	5.83896e-10	0.703633	75.9744	1
genotype * treatment	884917	1	884917	0.0262411	0.872332	0.000819361	0.0262411	0.0528352
Error	1.07912e+09	32	3.37226e+07

## Sheet: Figure 6J
EMX1 GLS1 cHET Latent Inhibition
Tone Fear Conditioning - Day 3
mouse ID	Genotype	Training	Freezing (%) Pre-CS	Freezing (%) During CS		mouse ID	Genotype	Training	Freezing (%) Pre-CS	Freezing (%) During CS
1270	ctrl	NPE	24.93	70.4		4300	ctrl	PE20	50.15	74.35
4223	ctrl	NPE	4.91	33.68		4330	ctrl	PE20	52.97	74.5
4268	ctrl	NPE	15.18	20.62		4331	ctrl	PE20	43.7	60.6
4293	ctrl	NPE	45.54	37		4334	ctrl	PE20	56.97	65.09
4351	ctrl	NPE	33.53	86.8		4335	ctrl	PE20	48.22	63.53
4380	ctrl	NPE	33.53	85.7		4375	ctrl	PE20	14.99	38.23
4411	ctrl	NPE	28.93	40.37		4443	ctrl	PE20	28.19	51.89
		AVG	26.65	53.51				AVG	42.17	61.17
n=	7	SEM	5.03286	10.1769		n=	7	SEM	5.71651	4.84283
mouse ID	Genotype	Training	Freezing (%) Pre-CS	Freezing (%) During CS		mouse ID	Genotype	Training	Freezing (%) Pre-CS	Freezing (%) During CS
4224	chet	NPE	58.93	52.52		4295	chet	PE20	47.63	65.89
4228	chet	NPE	0	13.5		4297	chet	PE20	42.73	41.15
4248	chet	NPE	65.62	49.63		4301	chet	PE20	23.89	78.73
4350	chet	NPE	30.42	59.19		4309	chet	PE20	29.19	38.73
4379	chet	NPE	25.07	78.91		4327	chet	PE20	5.78	39.57
4382	chet	NPE	11.42	51.36		4328	chet	PE20	28.53	53.37
4385	chet	NPE	13.8	85.59		4329	chet	PE20	6.69	26.88
4414	chet	NPE	40.5	50.28		4332	chet	PE20	11	65.39
4415	chet	NPE	10.68	78.34		4373	chet	PE20	41.69	73.01
4416	chet	NPE	11.57	55.18		4449	chet	PE20	47.03	67.98
4429	chet	NPE	26.85	44.57		4454	chet	PE20	11.72	19.43
4468	chet	NPE	54.9	53.14		4481	chet	PE20	38.43	62.1
4470	chet	NPE	19.88	43.52				AVG	27.8592	52.6858
		AVG	28.4338	55.0562		n=	12	SEM	4.58991	5.51985
n=	13	SEM	5.75209	5.13069
STATISTICS
Figure 6J (Latent inhibition, Tone, EMX1 GLS1 cHET) - Univariate Analysis of Variance - ANOVA 2 (genotype) x 2 (preexposure)
Tests of Between-Subjects Effectsa
Dependent Variable:	Tonefreez
Source	Type III Sum of Squares	df	Mean Square	F	Sig.	Partial Eta Squared	Noncent. Parameter	Observed Powerc
Corrected Model	345.489b	3	115.163	0.299384	0.825593	0.0250194	0.898151	0.101862
Intercept	110930	1	110930	288.379	1.78442e-18	0.891768	288.379	1
genotype	107.935	1	107.935	0.280594	0.599656	0.00795321	0.280594	0.0809353
preexposure	62.7411	1	62.7411	0.163105	0.688771	0.00463852	0.163105	0.0678642
genotype * preexposure	225.592	1	225.592	0.586459	0.448925	0.0164798	0.586459	0.1156
Error	13463.4	35	384.667
Total	132414	39
Corrected Total	13808.8	38
