# Supplementary figures and images for: Dopamine neuron dependent behaviors mediated by glutamate cotransmission
Source: eLife journal article supplement (doi:10.7554/elife.27566), 2017-07-13

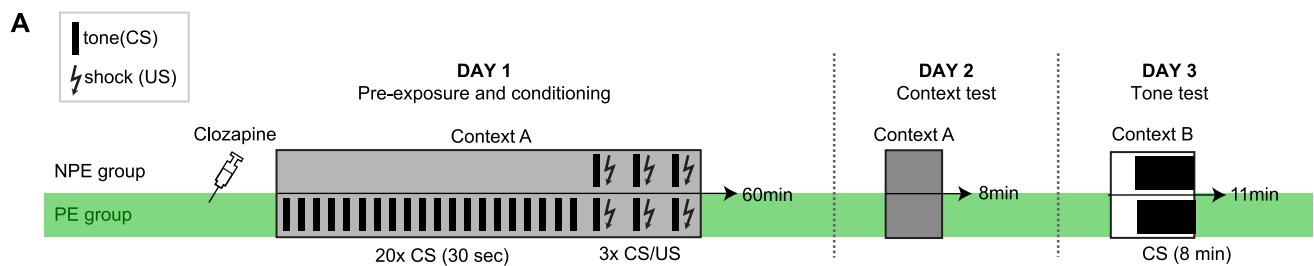

**B**

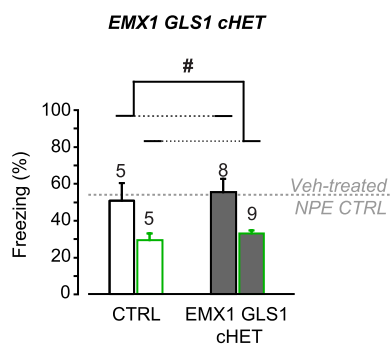

**C**

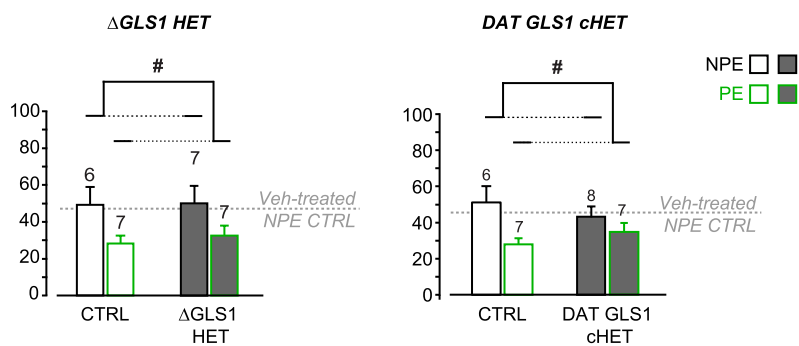

Supplement: supp [file elife-27566-supp-v1.zip]

**A**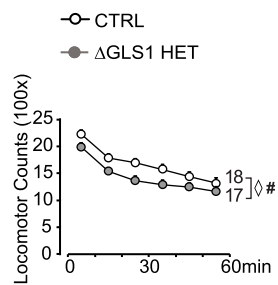**B**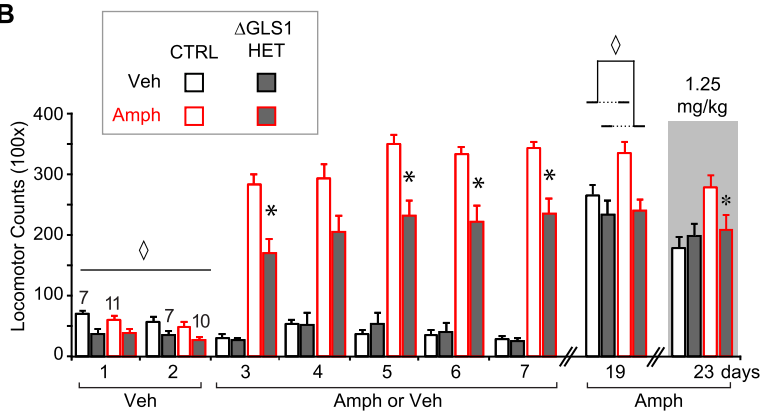**C**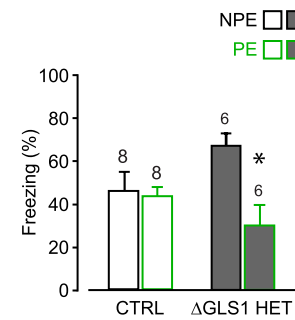

Supplement: supp [file elife-27566-supp-v1.zip]

**A**

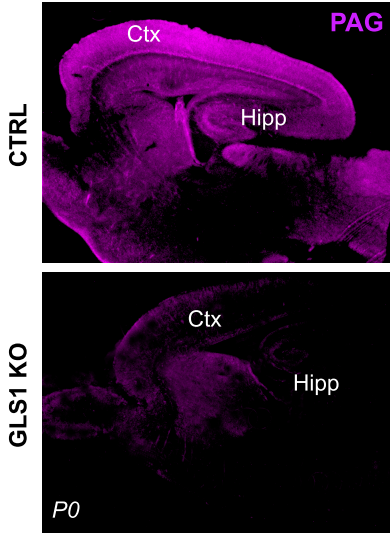

**B**

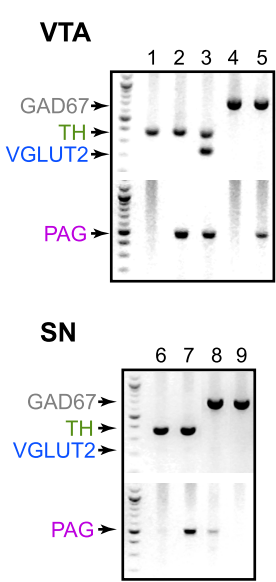

**C**

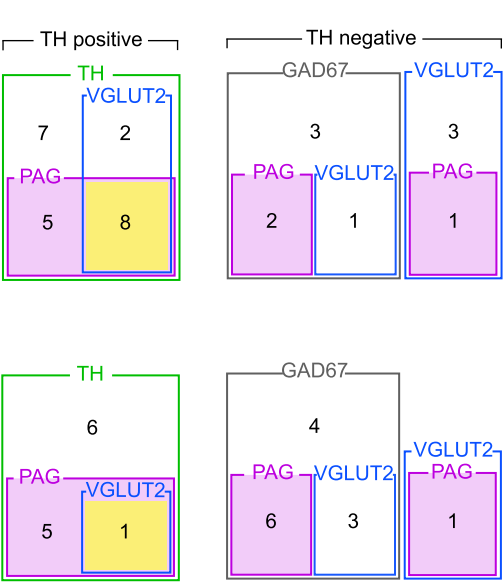

Supplement: supp [file elife-27566-supp-v1.zip]

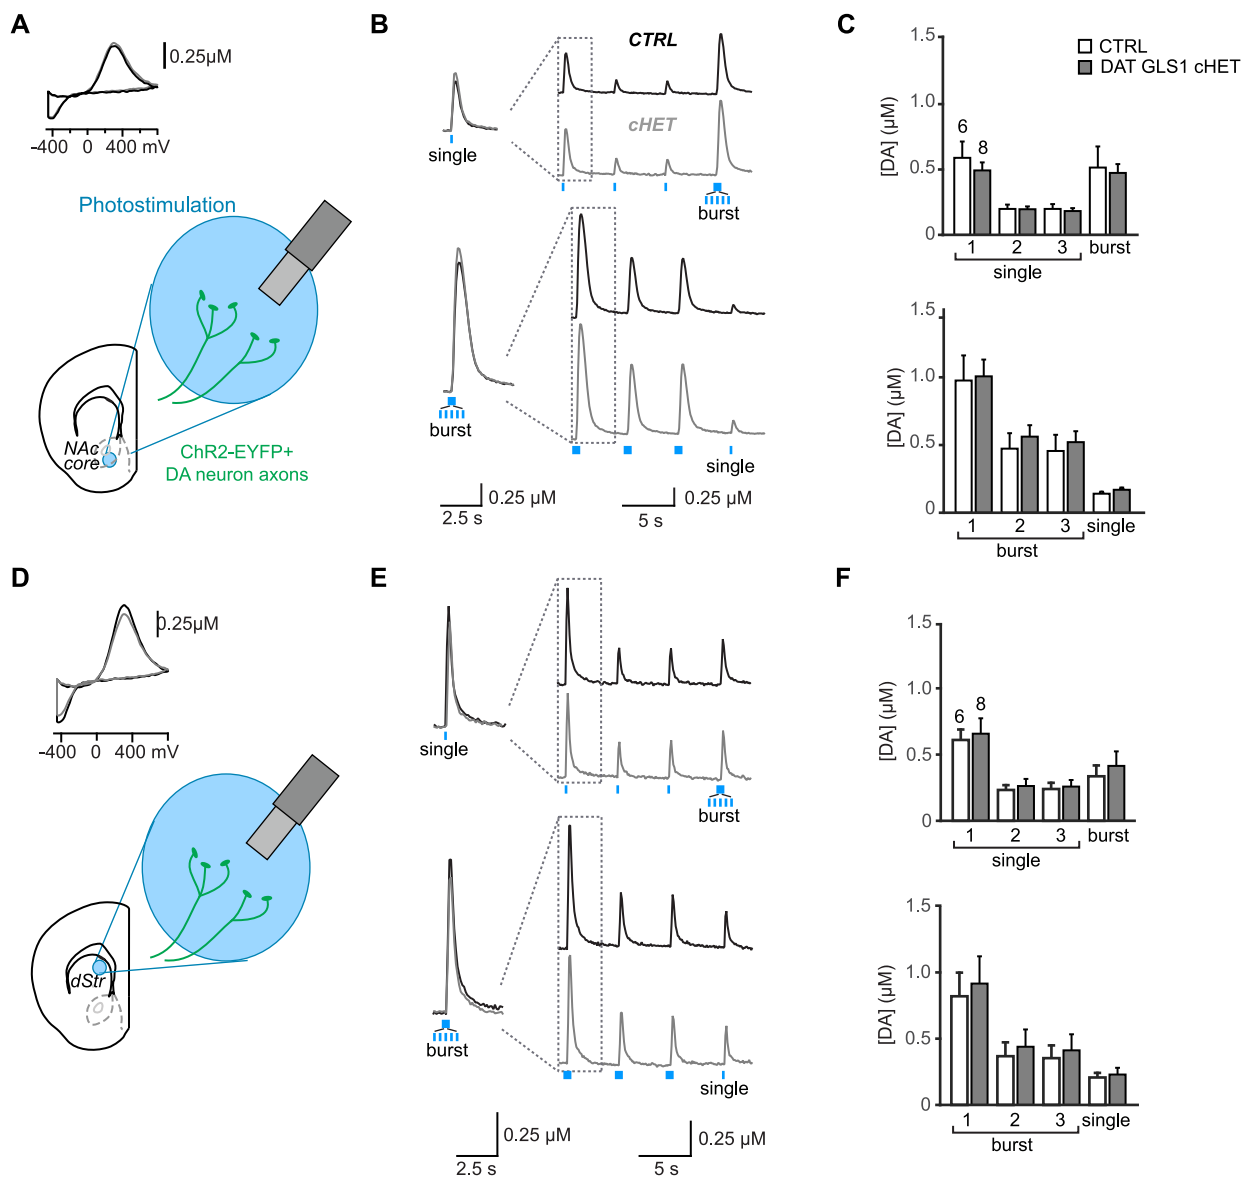

Supplement: supp [file elife-27566-supp-v1.zip]

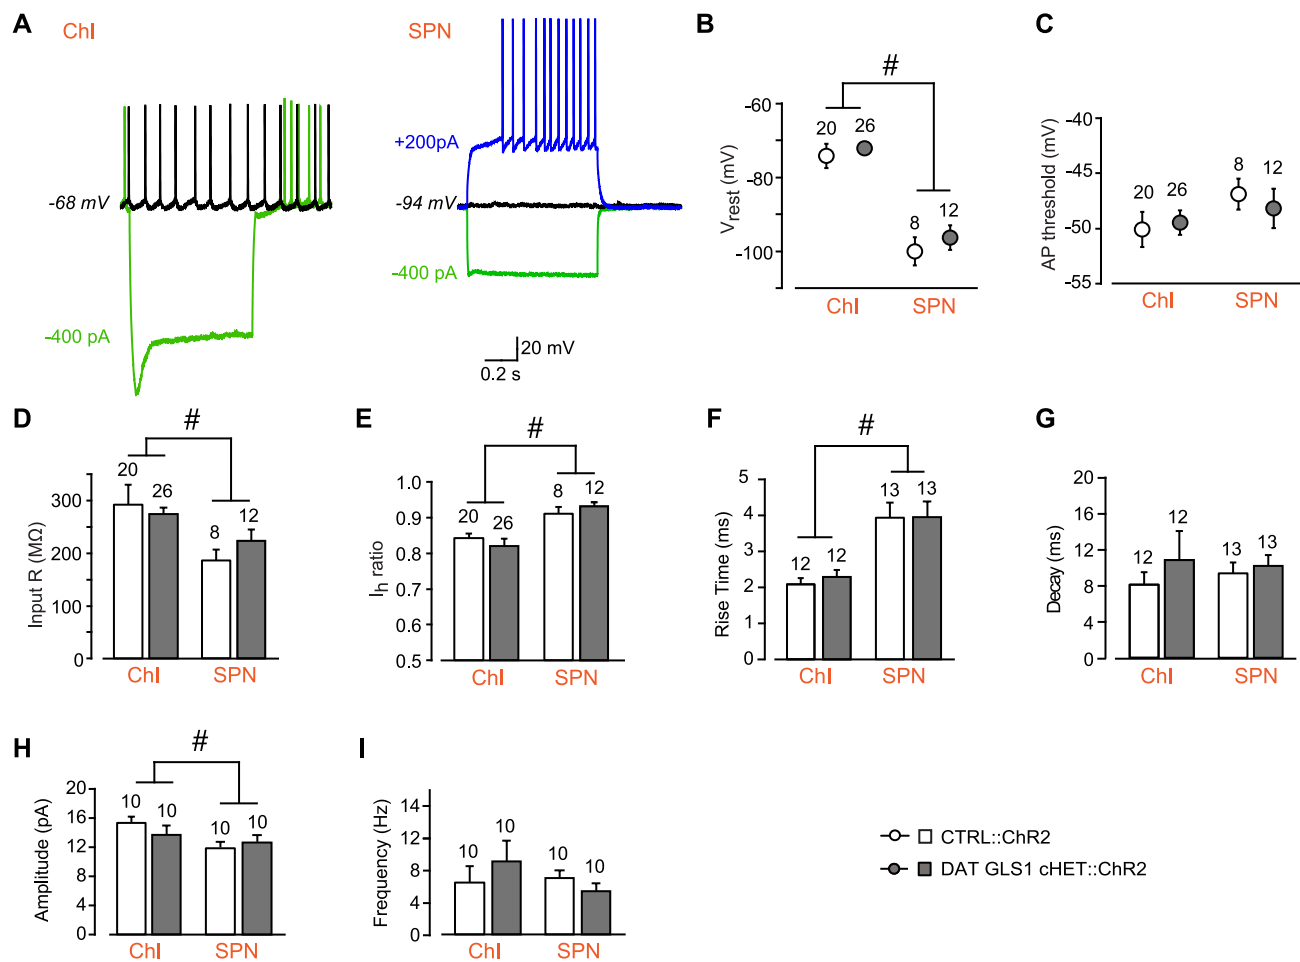

Supplement: supp [file elife-27566-supp-v1.zip]

**A**

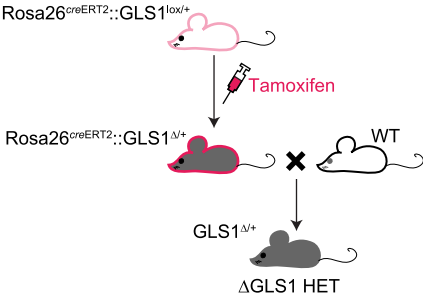

**B**

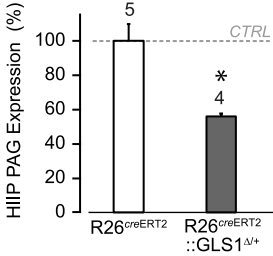

**C**

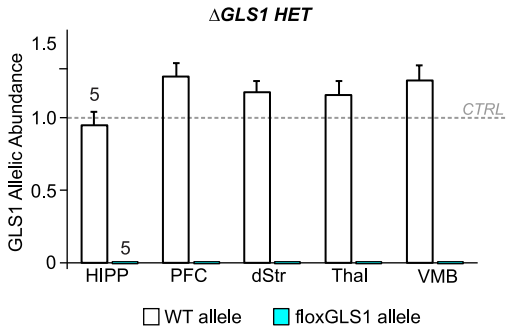

Supplement: supp [file elife-27566-supp-v1.zip]

**A**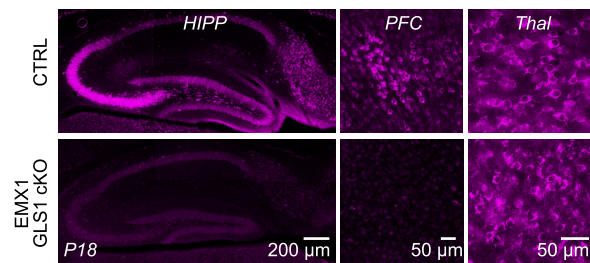**B**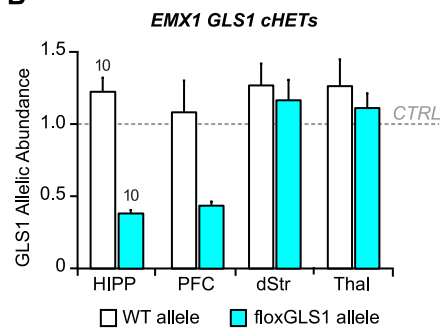**C**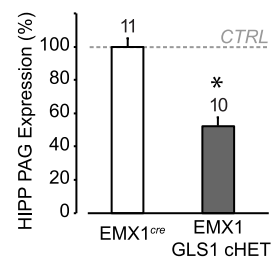

Supplement: supp [file elife-27566-supp-v1.zip]

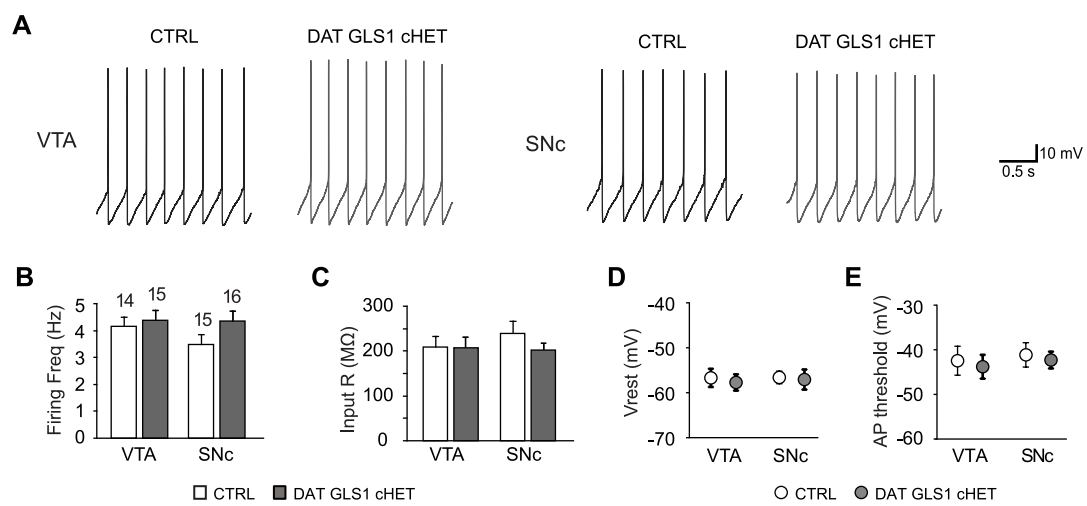

Supplement: supp [file elife-27566-supp-v1.zip]

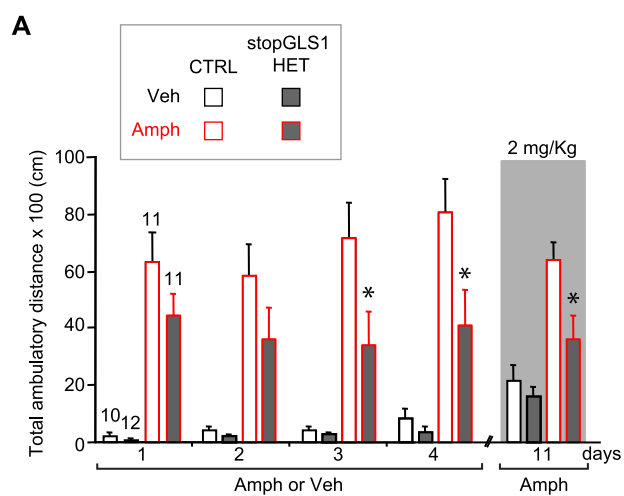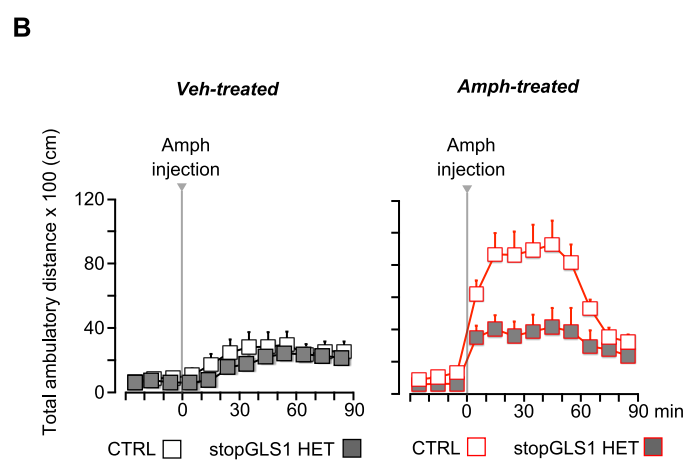

Supplement: supp [file elife-27566-supp-v1.zip]

**A**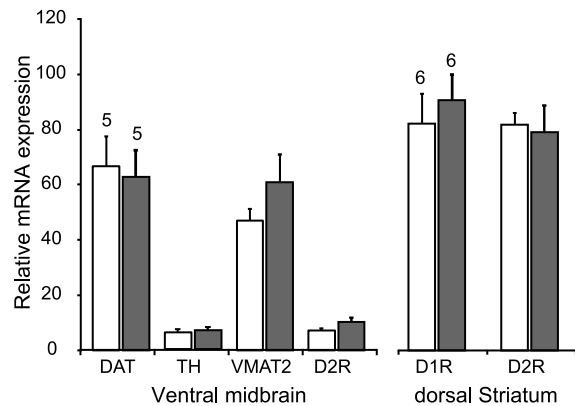**B**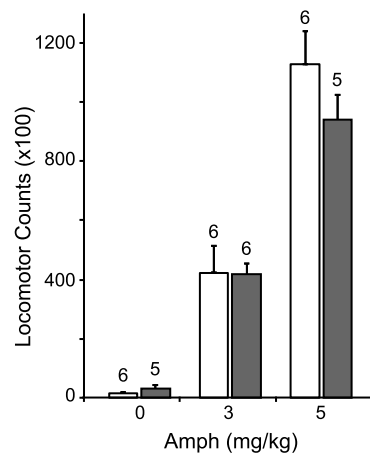**C**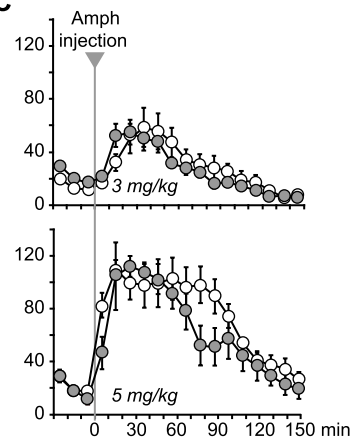

□ ○ CTRL    ■ ● DAT<sup>IREScrl/+</sup>

Supplement: supp [file elife-27566-supp-v1.zip]

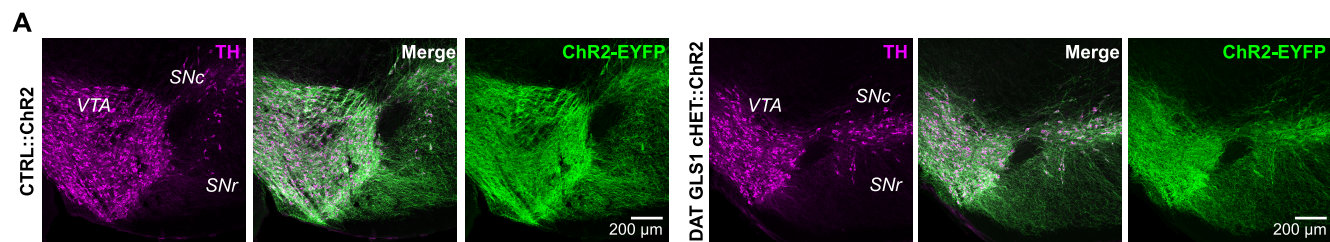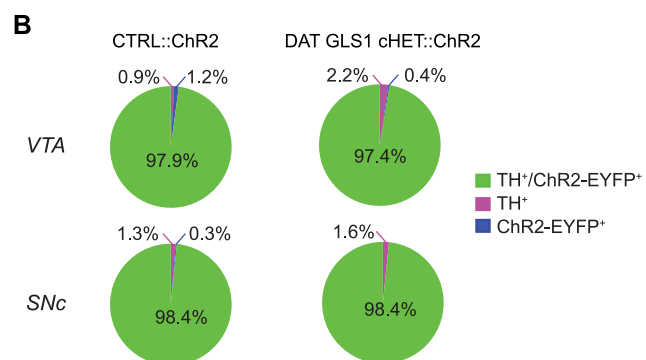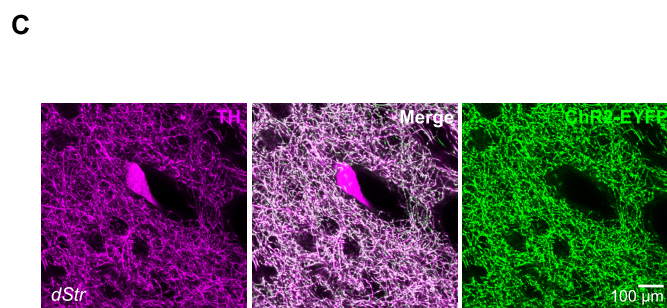

Supplement: supp [file elife-27566-supp-v1.zip]
